# Supplementary material for: Substrate-Dependent Selectivity in Sc(OTf)3-Catalyzed Cyclization of Alkenoic Acids and N-Protected Alkenamides
Source: MDPI journal article supplement (doi:10.3390/catal12111481), 2022-11-20
Supplement: s1 [file s1]

## *Supporting Information*

# **Substrate-dependent selectivity in Sc(OTf)<sub>3</sub>-catalyzed cyclization of alkenoic acids and N-protected alkenamides**

**Hailong Zhang, Romain Carlino, Régis Guillot, Richard Gil \*, Sophie Bezenine \* and Jérôme Hannedouche \***

Institut de Chimie Moléculaire et des Matériaux d'Orsay (ICMMO), Site Henri Moissan, Université Paris-Saclay, CNRS, 91400 Orsay, France

\* Correspondence: richard.gil@universite-paris-saclay.fr (R.G.); sophie.bezenine@universite-paris-saclay.fr (S.B.); jerome.hannedouche@universite-paris-saclay.fr (J.H.)

|                                                                                                                       |    |
|-----------------------------------------------------------------------------------------------------------------------|----|
| 1-Preparation of starting materials.....                                                                              | 2  |
| 1.1-Preparation of alkenoic acids.....                                                                                | 2  |
| 1.2- Preparation of alkenamides .....                                                                                 | 6  |
| 2-Optimization studies for the Sc(OTf) <sub>3</sub> -catalyzed cyclization of alkenoic acid <b>1b</b> by heating..... | 10 |
| 3-Cyclization Products .....                                                                                          | 10 |
| 4-Crystallographic Data .....                                                                                         | 18 |
| 5-Spectra .....                                                                                                       | 22 |
| 6-References .....                                                                                                    | 74 |

## 1-Preparation of starting materials

### 1.1-Preparation of alkenoic acids

**Representative procedure for the preparation of 2,2-dimethylpent-4-enoic acid (1b):**<sup>[1]</sup> To a solution of diisopropylamine (4.92 mL, 28.2 mmol) in THF (20 mL) at -78 °C was slowly added n-BuLi (2.5 M in hexane, 11.28 mL, 28.2 mmol), and the mixture was stirred at -78 °C for 0.5 h. To the solution was added isobutyric acid (0.82 g, 9.4 mmol) in THF (10 mL) and the mixture was stirred at 45 °C for 1.5 h. Allyl bromide (2.28 g, 18.8 mmol) was added to the solution at -78 °C and then the mixture was stirred at 45 °C overnight. H<sub>2</sub>O was added to the mixture and the aqueous layer was washed with Et<sub>2</sub>O. The aqueous layer was acidified with aq. HCl, and it was extracted with Et<sub>2</sub>O three times. The combined organic layers were washed with brine, dried over Na<sub>2</sub>SO<sub>4</sub>, filtered, and concentrated under vacuum. The residue was washed with pentane to give **1b**. Compounds **1c**, **1d**, **1f**, **1h**, **1i**, **1l**, **1m**, **1p** were prepared according to the representative procedure for **1b**.

#### 2,2-dimethylpent-4-enoic acid (1b)<sup>[1]</sup>

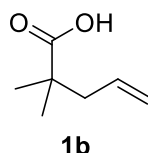

Colorless liquid, 86% yield. <sup>1</sup>H NMR (360 MHz, CDCl<sub>3</sub>) δ (ppm) 11.35 (b, 1H, OH), 5.85-5.66 (m, 1H, CH=CH<sub>2</sub>), 5.06 (d, *J* = 12.7 Hz, 2H, CH=CH<sub>2</sub>), 2.29 (d, *J* = 7.7 Hz, 2H, CH<sub>2</sub>), 1.18 (s, 6H, CH<sub>3</sub>). <sup>13</sup>C NMR (91 MHz, CDCl<sub>3</sub>) δ (ppm) 184.7, 134.0, 118.4, 44.5, 42.3, 24.7. HRMS (ESI) *m/z* calcd for C<sub>7</sub>H<sub>11</sub>O<sub>2</sub> [M-H]<sup>-</sup> 127.0765, found 127.0758. These data are in agreement with literature data.<sup>[1]</sup>

#### 1-allylcyclohexane-1-carboxylic acid (1c)<sup>[1]</sup>

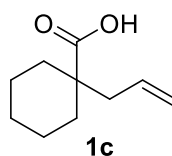

Colorless liquid, 48% yield. <sup>1</sup>H NMR (360 MHz, CDCl<sub>3</sub>) δ (ppm) 5.83-5.70 (m, 1H, CH=CH<sub>2</sub>), 5.10-5.01 (m, 2H, CH=CH<sub>2</sub>), 2.29 (d, *J* = 7.2 Hz, 1H, CH<sub>2</sub>CH=CH<sub>2</sub>), 2.09-2.00 (m, 2H, Cy-H), 1.86-1.51 (m, 3H, Cy-H), 1.47-1.35 (m, 2H, Cy-H), 1.33-1.19 (m, 3H, Cy-H). <sup>13</sup>C NMR (63 MHz, CDCl<sub>3</sub>) δ (ppm) 183.1, 133.5, 118.1, 47.3, 44.5, 33.6, 26.9, 23.2. HRMS (ESI) *m/z* calcd for C<sub>10</sub>H<sub>16</sub>O<sub>2</sub>Na [M+Na]<sup>+</sup> 191.1043, found 191.1036. These data are in agreement with literature data.<sup>[1]</sup>

#### 2,2-dimethylpent-4-enoic acid (1d)<sup>[2]</sup>

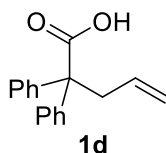

White solid, 94% yield. m.p. 140-142 °C, <sup>1</sup>H NMR (360 MHz, CDCl<sub>3</sub>) δ (ppm) 7.34-7.22 (m, 10H, Ar-H), 5.59 (ddt, *J* = 15.5, 11.9, 6.9 Hz, 1H, CH=CH<sub>2</sub>), 4.93 (d, *J* = 15.5 Hz, 1H, CH=CH<sub>2</sub>), 4.92 (d, *J* = 11.9 Hz, 1H, CH=CH<sub>2</sub>), 3.16 (d, *J* = 6.9 Hz, 2H, CH<sub>2</sub>). <sup>13</sup>C NMR (91 MHz, CDCl<sub>3</sub>) δ (ppm) 179.9, 142.2, 134.0, 129.2, 128.1, 127.3, 116.8, 60.4, 42.7. HRMS (ESI) *m/z* calcd for C<sub>17</sub>H<sub>16</sub>O<sub>2</sub>Na [M+Na]<sup>+</sup> 275.1043, found 275.1038. These data are in agreement with literature data.<sup>[2]</sup>

**2-methyl-2-phenylpent-4-enoic acid (1f)**<sup>[3]</sup>

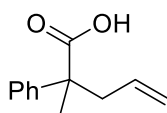

**1f**

Yellow liquid, 68% yield. <sup>1</sup>H NMR (360 MHz, CDCl<sub>3</sub>)  $\delta$  (ppm) 10.65 (b, 1H, OH), 7.44 - 7.25 (m, 5H, Ar-H), 5.64 (ddt,  $J$  = 15.7, 10.8, 7.8 Hz, 1H, CH=CH<sub>2</sub>), 5.11 (d,  $J$  = 15.7 Hz, 1H, CH=CH<sub>2</sub>), 5.07 (d,  $J$  = 10.8 Hz 1H, CH=CH<sub>2</sub>), 2.85 (dd,  $J$  = 14.1, 7.8 Hz, 1H, CH<sub>2</sub>), 2.70 (dd,  $J$  = 14.1, 7.8 Hz, 1H, CH<sub>2</sub>), 1.58 (s, 3H, CH<sub>3</sub>). <sup>13</sup>C NMR (91 MHz, CDCl<sub>3</sub>)  $\delta$  (ppm) 182.2, 142.5, 134.0, 128.7, 127.2, 126.3, 118.9, 49.8, 43.6, 22.3. HRMS (ESI)  $m/z$  calcd for C<sub>12</sub>H<sub>14</sub>O<sub>2</sub>Na [M+Na]<sup>+</sup> 213.0886, found 213.0888. These data are in agreement with literature data.<sup>[3]</sup>

**2,2-diphenylhex-5-enoic acid (1h)**<sup>[4]</sup>

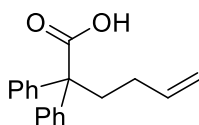

**1h**

White solid, 78% yield, m.p. 134-136 °C. <sup>1</sup>H NMR (250 MHz, CDCl<sub>3</sub>)  $\delta$  (ppm) 7.45-7.20 (m, 10H, Ar-H), 5.86-5.68 (m, 1H, CH=CH<sub>2</sub>), 4.96 (d,  $J$  = 18.8 Hz, 1H, CH=CH<sub>2</sub>), 4.92 (d,  $J$  = 11.6 Hz, 1H, CH=CH<sub>2</sub>), 2.54-2.40 (m, 2H, CH<sub>2</sub>), 1.90-1.75 (m, 2H, CH<sub>2</sub>). <sup>13</sup>C NMR (63 MHz, CDCl<sub>3</sub>)  $\delta$  (ppm) 180.9, 142.3, 138.3, 129.1, 128.1, 127.2, 114.8, 60.2, 37.2, 29.7. HRMS (ESI)  $m/z$  calcd for C<sub>18</sub>H<sub>18</sub>O<sub>2</sub>Na [M+Na]<sup>+</sup> 289.1199, found 289.1188. These data are in agreement with literature data.<sup>[4]</sup>

**(E)-2,2-diphenylhex-4-enoic acid (1i)**<sup>[5]</sup>

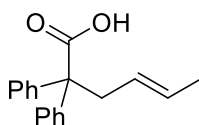

**1i**

White solid, 84% yield, (*E*:*Z*) isomer = 83:17. <sup>1</sup>H NMR (*E* isomer, 250 MHz, CDCl<sub>3</sub>)  $\delta$  (ppm) 7.41-7.18 (m, 10H, Ar-H), 5.35-5.18 (m, 2H, CH=CH<sub>2</sub>), 3.08 (d,  $J$  = 5.6 Hz, 2H, CH<sub>2</sub>), 1.50 (d,  $J$  = 5.1 Hz, 3H, CH<sub>3</sub>). <sup>13</sup>C NMR (63 MHz, CDCl<sub>3</sub>)  $\delta$  (ppm) 179.7, 142.3, 129.5, 129.3, 127.9, 127.1, 126.1, 60.6, 41.5, 18.1). These data are in agreement with literature data.<sup>[5]</sup>

**(E)-2,2-dimethyl-5-phenylpent-4-enoic acid (1l)**<sup>[6]</sup>

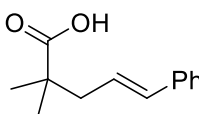

**1l**

Light yellow solid, 38% yield. m.p. 172-174 °C, <sup>1</sup>H NMR (360 MHz, CDCl<sub>3</sub>)  $\delta$  (ppm) 7.38-7.22 (m, 5H, Ar-H), 6.45 (d,  $J$  = 15.8 Hz, 1H, CH=CH), 6.19 (dt,  $J$  = 15.6, 7.5Hz, 1H, CH=CH), 2.45 (d,  $J$  = 7.5 Hz, 2H, CH<sub>2</sub>), 1.24 (s, 6H, CH<sub>3</sub>). <sup>13</sup>C NMR (91 MHz, CDCl<sub>3</sub>)  $\delta$  (ppm) 184.4, 137.5, 133.5, 128.6, 127.4, 126.3, 125.8, 43.6, 42.7, 24.9. HRMS (ESI)  $m/z$  calcd for C<sub>13</sub>H<sub>16</sub>O<sub>2</sub>Na [M+Na]<sup>+</sup> 227.1043, found 227.1040. These data are in agreement with literature data.<sup>[6]</sup>

**(E)-2,2,5-triphenylpent-4-enoic acid (1m)**<sup>[6]</sup>

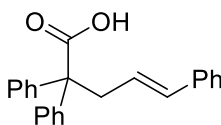

**1m**

Light yellow solid, 57% yield. m.p. 146-148 °C,  $^1\text{H}$  NMR (360 MHz,  $\text{CDCl}_3$ )  $\delta$  (ppm) 7.46-7.22 (m, 15H, Ar-H), 6.31 (d,  $J = 15.8$  Hz, 1H,  $\text{CH}=\text{CH}$ ), 6.03 (dt,  $J = 15.8, 7.0$  Hz 1H,  $\text{CH}=\text{CH}$ ), 3.39 (d,  $J = 7.0$  Hz, 2H,  $\text{CH}_2$ ).  $^{13}\text{C}$  NMR (91 MHz,  $\text{CDCl}_3$ )  $\delta$  (ppm) 180.1, 142.0, 137.6, 133.7, 129.3, 128.5, 128.1, 127.3, 127.2, 126.2, 125.8, 60.8, 41.7. HRMS (ESI)  $m/z$  calcd for  $\text{C}_{23}\text{H}_{20}\text{O}_2\text{Na}$   $[\text{M}+\text{Na}]^+$  351.1356, found 351.1342. These data are in agreement with literature data.<sup>[6]</sup>

#### 5-methyl-2,2-diphenylhex-4-enoic acid (**1p**)<sup>[4]</sup>

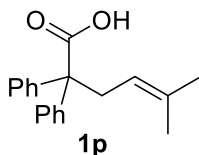

White solid, 91% yield.  $^1\text{H}$  NMR (250 MHz,  $\text{CDCl}_3$ )  $\delta$  (ppm) 7.40-7.11 (m, 10H, Ar-H), 5.13-4.99 (m, 1H,  $\text{CH}=\text{C}$ ), 3.11 (d,  $J = 7.2$  Hz, 2H,  $\text{CH}_2$ ), 1.56 (s, 3H,  $\text{CH}_3$ ), 1.26 (s, 3H,  $\text{CH}_3$ ).  $^{13}\text{C}$  NMR (91 MHz,  $\text{CDCl}_3$ )  $\delta$  (ppm) 180.6, 142.2, 135.3, 129.2, 127.8, 126.9, 119.3, 60.6, 36.7, 25.9, 17.6. HRMS (ESI)  $m/z$  calcd for  $\text{C}_{23}\text{H}_{20}\text{O}_2\text{Na}$   $[\text{M}+\text{Na}]^+$  351.1356, found 351.1346.

**Representative procedure for the preparation of 2,2-bis(4-(*tert*-butyl)phenyl)pent-4-enoic acid (**1e**).** A solution of glyoxylic acid (50 mmol) and *tert*-butylbenzene (100 mmol) in acetic acid (100 mL) was cooled in an ice bath. Concentrated sulfuric acid (6 mL) was added dropwise under stirring. The solution was then stirred at 40 °C overnight. Then to the reaction was added water and the product was extracted by dichloromethane. The combined organic layer was washed with water, and brine and dried over  $\text{Na}_2\text{SO}_4$ , filtered, and concentrated under vacuum. The residue was purified by column chromatography on silica gel (petroleum ether/ethyl acetate 5:1) to give the intermediate (5.04 mg, 37%) as a white solid. To a solution of diisopropylamine (4.92 mL, 28.2 mmol) in THF (20 mL) at -78 °C was slowly added *n*-BuLi (2.5 M in hexane, 11.28 mL, 28.2 mmol), and the mixture was stirred at -78 °C for 0.5 h. To the solution was added the intermediate (2.56 g, 9.4 mmol) in THF (10 mL), and the mixture was stirred at 45 °C for 1.5 h. Allyl bromide (3.70 g, 18.8 mmol) was added to the solution at -78 °C and then the mixture was stirred at 45 °C overnight.  $\text{H}_2\text{O}$  was added to the mixture and the aqueous layer was washed with  $\text{Et}_2\text{O}$ . The aqueous layer was acidified with  $\text{HCl}_{\text{aq}}$ , and it was extracted with  $\text{Et}_2\text{O}$ . The combined organic layers were washed with brine, dried over  $\text{Na}_2\text{SO}_4$ , filtered, and concentrated under vacuum. The solid residue was washed with pentane to give **1e**. Compounds **1n**, **1o**, **1r** and **1s** were prepared according to the representative procedure for **1e**.

#### 2,2-bis(4-(*tert*-butyl)phenyl)pent-4-enoic acid (**1e**)<sup>[7]</sup>

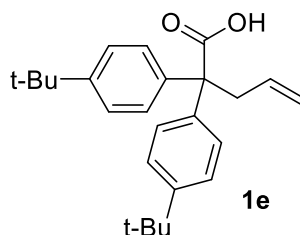

White solid, 88% yield. m.p. 126-128 °C,  $^1\text{H}$  NMR (360 MHz,  $\text{CDCl}_3$ )  $\delta$  (ppm) 7.31 (d, 4H,  $J = 8.3$  Hz, 4H, Ar-H), 7.22 (d,  $J = 8.3$  Hz, 4H, Ar-H), 5.58 (ddt,  $J = 16.9, 10.2, 7.0$  Hz, 1H,  $\text{CH}=\text{CH}_2$ ), 4.98 (d,  $J = 16.9$  Hz, 1H,  $\text{CH}=\text{CH}_2$ ), 4.94 (d,  $J = 10.2$  Hz, 1H,  $\text{CH}=\text{CH}_2$ ), 3.14 (d,  $J = 7.0$  Hz, 2H,  $\text{CH}_2$ ), 1.31 (s, 18H,  $\text{CH}_3$ ).  $^{13}\text{C}$  NMR (91 MHz,  $\text{CDCl}_3$ )  $\delta$  (ppm) 180.0, 149.8, 139.0, 134.4, 128.8, 124.9, 118.4, 59.5, 42.6, 34.6, 31.5. HRMS (ESI)  $m/z$  calcd for  $\text{C}_{25}\text{H}_{32}\text{O}_2\text{Na}$   $[\text{M}+\text{Na}]^+$  387.2295, found 387.2281. These data are in agreement with literature data.<sup>[7]</sup>

**(E)-2,2-bis(4-(tert-butyl)phenyl)-5-phenylpent-4-enoic acid (1n)**

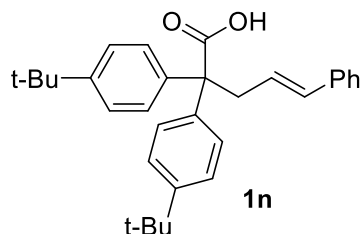

White solid, 81% yield. m.p. 218-220 °C,  $^1\text{H}$  NMR (360 MHz,  $\text{CDCl}_3$ )  $\delta$  (ppm) 7.34 (d,  $J = 8.7$  Hz, 4H, Ar-H), 7.30-7.23 (m, 6H, Ar-H), 7.22-7.16 (m, 3H, Ar-H), 6.22 (d, 1H,  $J = 15.8$  Hz,  $\text{CH}=\text{CH}$ ), 5.99 (dt,  $J = 15.8, 7.2$  Hz, 1H,  $\text{CH}=\text{CH}$ ), 3.30 (d,  $J = 7.2$  Hz, 2H,  $\text{CH}_2$ ), 1.34 (s, 18H,  $\text{CH}_3$ ).  $^{13}\text{C}$  NMR (91 MHz,  $\text{CDCl}_3$ )  $\delta$  (ppm) 179.6, 149.9, 139.0, 137.8, 133.5, 128.8, 128.5, 127.1, 126.3, 126.2, 124.9, 60.1, 41.8, 34.6, 31.5. HRMS (ESI)  $m/z$  calcd for  $\text{C}_{31}\text{H}_{36}\text{O}_2\text{Na}$   $[\text{M}+\text{Na}]^+$  463.2608, found 463.2585.

**(E)-2,2-bis(4-methoxyphenyl)-5-phenylpent-4-enoic acid (1o)**

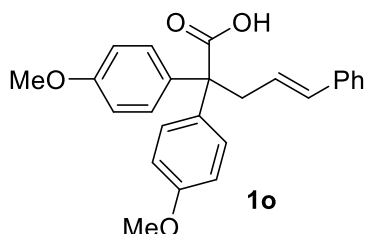

Yellow solid, 68% yield. m.p. 142-144 °C,  $^1\text{H}$  NMR (360 MHz,  $\text{CDCl}_3$ )  $\delta$  (ppm) 7.32-7.16 (m, 9H, Ar-H), 6.87 (d, 4H,  $J = 8.9$  Hz, Ar-H), 6.29 (d, 1H,  $J = 16.1$  Hz,  $\text{CH}=\text{CH}$ ), 5.9 (dt, 1H,  $J = 7.0, 16.1$ , Hz,  $\text{CH}=\text{CH}$ ), 3.84 (s, 6H,  $\text{OCH}_3$ ), 3.28 (d, 2H,  $J = 7.0$  Hz,  $\text{CH}_2$ ).  $^{13}\text{C}$  NMR (91 MHz,  $\text{CDCl}_3$ )  $\delta$  (ppm) 180.3, 158.6, 137.7, 134.3, 133.6, 130.3, 128.5, 127.2, 126.2, 126.1, 113.4, 59.4, 55.4, 42.0. HRMS (ESI)  $m/z$  calcd for  $\text{C}_{25}\text{H}_{24}\text{O}_4\text{Na}$   $[\text{M}+\text{Na}]^+$  411.1567, found 411.1551.

**(E)-2,2-di([1,1'-biphenyl]-4-yl)-5-phenylpent-4-enoic acid (1r)**

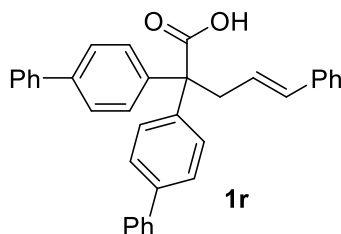

White solid, 19% yield. m.p. 100-102 °C,  $^1\text{H}$  NMR (360 MHz,  $\text{CDCl}_3$ )  $\delta$  (ppm) 7.64-7.54 (m, 8H, Ar-H), 7.48-7.41 (m, 8H, Ar-H), 7.37-7.32 (m, 2H, Ar-H), 7.25-7.13 (m, 5H, Ar-H), 6.31 (d, 1H,  $J = 15.8$  Hz,  $\text{CH}=\text{CH}$ ), 6.02 (dt,  $J = 15.8, 7.1$  Hz, 1H,  $\text{CH}=\text{CH}$ ), 3.38 (d, 2H,  $J = 7.1$  Hz,  $\text{CH}_2$ ).  $^{13}\text{C}$  NMR (91 MHz,  $\text{CDCl}_3$ )  $\delta$  (ppm) 178.9, 141.0, 140.6, 140.1, 137.6, 134.0, 129.7, 128.9, 128.6, 127.5, 127.3, 127.2, 126.8, 126.3, 125.6, 60.4, 41.8. HRMS (ESI)  $m/z$  calcd for  $\text{C}_{35}\text{H}_{28}\text{O}_2\text{Na}$   $[\text{M}+\text{Na}]^+$  503.1982, found 503.1957.

**(E)-2,2-bis(4-chlorophenyl)-5-phenylpent-4-enoic acid (1s)**

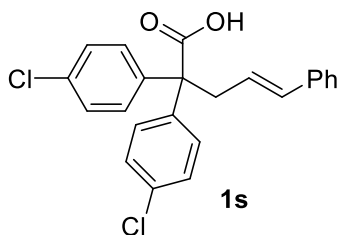

Orange solid, 37% yield. m.p. 184 - 186 °C,  $^1\text{H}$  NMR (360 MHz,  $\text{CDCl}_3$ )  $\delta$  (ppm) 7.37-7.16 (m, 13H, Ar-H), 6.26 (d, 1H,  $J = 15.4$  Hz,  $\text{CH}=\text{CH}-\text{Ph}$ ), 5.90 (dt, 1H,  $J = 15.4$  Hz, 7.1 Hz,  $\text{CH}_2-\text{CH}=\text{CH}$ ), 3.26 (d, 2H,  $J = 7.1$  Hz,  $\text{CH}_2$ ).  $^{13}\text{C}$  NMR (91 MHz,  $\text{CDCl}_3$ )  $\delta$  (ppm) 178.9, 140.2, 137.3, 134.6, 133.6, 130.6, 128.7, 128.4, 127.6, 126.2, 124.6, 60.0, 41.7. HRMS (ESI)  $m/z$  calcd for  $\text{C}_{23}\text{H}_{18}\text{Cl}_2\text{O}_2\text{Na}$   $[\text{M}+\text{Na}]^+$  419.0576, found 419.0564.

#### Procedure for the preparation of methyl (*E*)-2,2,5-triphenylpent-4-enoate (**1q**)<sup>[5]</sup>

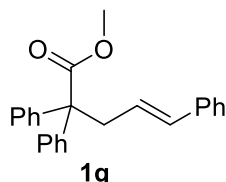

To a solution of 2,2,5-triphenylpent-4-enoic acid (**1m**, 0.328 g, 1 mmol) in acetone (3 mL) at 25 °C was added  $\text{K}_2\text{CO}_3$  in one portion, and the mixture was stirred at 25 °C for 20 min. To the solution was added iodomethane (0.85 g, 6 mmol), and the mixture was stirred at 25 °C for 18 h. After the reaction, the volatiles were removed under decreased pressure, then  $\text{H}_2\text{O}$  was added to the mixture and it was extracted with EtOAc. The combined organic layers were washed with brine, dried over  $\text{Na}_2\text{SO}_4$ , filtered, and concentrated under vacuum to give **1q** (0.32g, 0.93 mmol, 94% yield).  $^1\text{H}$  NMR (360 MHz,  $\text{CDCl}_3$ )  $\delta$  (ppm) 7.46 – 7.20 (m, 15H, Ar-H), 6.32 (d,  $J = 15.8$  Hz, 1H,  $\text{CH}=\text{CH}$ ), 6.05 (dt,  $J = 15.8$  Hz, 7.3 Hz, 1H,  $\text{CH}=\text{CH}$ ), 3.78 (s, 3H,  $\text{CH}_3$ ), 3.40 (d,  $J = 7.3$  Hz, 2H,  $\text{CH}_2$ ).  $^{13}\text{C}$  NMR (91 MHz,  $\text{CDCl}_3$ )  $\delta$  (ppm) 174.6, 142.6, 137.7, 133.5, 129.1, 128.5, 128.0, 127.1, 127.0, 126.1, 60.9, 52.5, 42.0. HRMS (ESI)  $m/z$  calcd for  $\text{C}_{24}\text{H}_{22}\text{O}_2\text{Na}$   $[\text{M}+\text{Na}]^+$  365.1512, found 365.1500. These data are in agreement with literature data.<sup>[5]</sup>

## 1.2- Preparation of alkenamides

**Representative procedure for the preparation of *N*-tosylpent-4-enamide (**5d**):**<sup>[8]</sup> To a solution of **1a** (1.56 g, 15.6 mmol) in THF (30 mL) was added *p*-toluenesulfonyl isocyanate (2.4 mL, 15.6 mmol), and the mixture was stirred at room temperature for 10 min. To the solution was added triethylamine (2.2 mL, 15.6 mmol) and the mixture was stirred at room temperature for 2 h. Aqueous HCl was added to the mixture, and extraction with EtOAc was done. The combined organic layers were washed with brine, dried over  $\text{Na}_2\text{SO}_4$ , filtered, and concentrated under vacuum. The residue was subjected to short column chromatography on silica gel with EtOAc/hexane (1/5) as an eluent to give **5d**. Compounds **5a**, **5b**, **5c**, and **5e** were prepared according to the representative procedure for **5d**.

#### *N*-tosylpent-4-enamide (**5d**)<sup>[1]</sup>

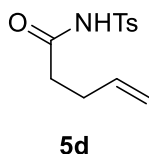

White solid, 75% yield. m.p. 89-91 °C,  $^1\text{H}$  NMR (360 MHz,  $\text{CDCl}_3$ )  $\delta$  (ppm) 8.25 (b, 1H, NH), 7.94 (d,  $J = 8.5$  Hz, 2H, Ar), 7.35 (d,  $J = 8.5$  Hz, 2H, Ar), 5.72 (ddt,  $J = 16.6$ , 10.7, 6.8 Hz 1H,  $\text{CH}=\text{CH}_2$ ), 4.99 (d,  $J = 16.6$  Hz, 1H,  $\text{CH}=\text{CH}_2$ ), 4.98 (d,  $J = 10.7$  Hz, 1H,  $\text{CH}=\text{CH}_2$ ), 2.45 (s, 3H,  $\text{CH}_3$ ), 2.38 – 2.28 (m, 4H,  $\text{CH}_2$ ).  $^{13}\text{C}$  NMR (91 MHz,  $\text{CDCl}_3$ )  $\delta$  (ppm) 170.0, 145.4, 135.9, 135.6, 129.8, 128.5, 116.6, 35.6, 28.3, 21.9. HRMS (ESI)  $m/z$  calcd for  $\text{C}_{12}\text{H}_{15}\text{O}_3\text{NSNa}$   $[\text{M}+\text{Na}]^+$  276.0665, found 276.0662. These data are in agreement with literature data.<sup>[1]</sup>

### 2,2-dimethyl-*N*-tosylpent-4-enamide (5a)<sup>[1]</sup>

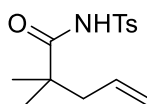

**5a**

White solid, 62% yield. m.p. 148-150 °C, <sup>1</sup>H NMR (360 MHz, CDCl<sub>3</sub>) δ (ppm) 8.76 (b, 1H, NH), 7.94 (d, *J* = 8.3 Hz, 2H, Ar-H), 7.33 (d, *J* = 8.3 Hz, 2H, CH<sub>2</sub>), 5.59-5.47 (m, 1H, CH=CH<sub>2</sub>), 4.96 (dd, *J* = 8.3, 1.5 Hz, 1H, CH=CH<sub>2</sub>), 4.95 (dd, *J* = 18.0, 1.5 Hz, 1H, CH=CH<sub>2</sub>), 2.44 (s, 3H, CH<sub>3</sub>), 2.18 (d, *J* = 7.3 Hz, 2H, CH<sub>2</sub>), 1.12 (s, 6H, CH<sub>3</sub>). <sup>13</sup>C NMR (91 MHz, CDCl<sub>3</sub>) δ (ppm) 175.3, 145.1, 135.5, 132.9, 129.6, 128.5, 119.1, 44.5, 43.5, 24.4, 21.8. HRMS (ESI) *m/z* calcd for C<sub>14</sub>H<sub>19</sub>NO<sub>3</sub>SNa [M+Na]<sup>+</sup> 304.0978, found 304.0979. These data are in agreement with literature data.<sup>[1]</sup>

### 1-allyl-*N*-tosylcyclohexane-1-carboxamide (5b)<sup>[1]</sup>

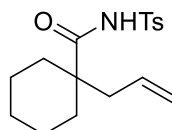

**5b**

White solid, 55% yield. m.p. 148-150 °C, <sup>1</sup>H NMR (360 MHz, CDCl<sub>3</sub>) δ (ppm) 8.47 (b, 1H, NH), 7.94 (d, *J* = 8.6 Hz, 2H, Ar-H), 7.33 (d, *J* = 8.6 Hz, 2H, Ar-H), 5.51 - 5.39 (m, 1H, CH=CH<sub>2</sub>), 4.91 (dd, *J* = 10.3, 1.3 Hz, 1H, CH=CH<sub>2</sub>), 4.86 (dd, *J* = 16.9, 1.3 Hz, 1H, CH=CH<sub>2</sub>), 2.44 (s, 3H, CH<sub>3</sub>), 2.13 (d, *J* = 7.6 Hz, 2H, CH<sub>2</sub>), 1.90-1.85 (m, 2H, CH<sub>2</sub>), 1.55-1.46 (m, 3H, 1CH<sub>2</sub>, CHH), 1.36-1.20 (m, 5H, 2CH<sub>2</sub>, CHH). <sup>13</sup>C NMR (91 MHz, CDCl<sub>3</sub>) δ (ppm) 174.2, 145.1, 135.7, 132.1, 129.6, 128.7, 119.1, 48.1, 44.0, 33.6, 25.7, 22.7, 21.8. HRMS (ESI) *m/z* calcd for C<sub>17</sub>H<sub>24</sub>NO<sub>3</sub>S [M+H]<sup>+</sup> 322.1471, found 322.1463. These data are in agreement with literature data.<sup>[1]</sup>

### 2,2-diphenyl-*N*-tosylpent-4-enamide (5c)<sup>[5]</sup>

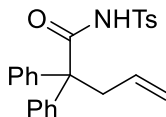

**5c**

White solid, 82% yield. m.p. 118-120 °C, <sup>1</sup>H NMR (360 MHz, CDCl<sub>3</sub>) δ (ppm) 7.78 (b, 1H, NH), 7.66 (d, *J* = 8.4 Hz, 2H, Ar-H), 7.24-7.18 (m, 8H, Ar-H), 7.07-7.04 (m, 4H, Ar-H), 5.50-5.39 (m, 1H, CH=CH<sub>2</sub>), 4.80 (dd, *J* = 8.5, 1.9 Hz, 1H, CH=CH<sub>2</sub>), 4.78 (dd, *J* = 18.6, 1.9 Hz, 1H, CH=CH<sub>2</sub>), 2.98 (d, *J* = 6.8 Hz, 2H, CH<sub>2</sub>), 2.37 (s, 3H, CH<sub>3</sub>). <sup>13</sup>C NMR (91 MHz, CDCl<sub>3</sub>) δ (ppm) 171.5, 145.1, 140.2, 135.0, 133.5, 129.54, 128.8, 128.5, 127.8, 119.2, 61.6, 42.8, 21.8. HRMS (ESI) *m/z* calcd for C<sub>24</sub>H<sub>24</sub>NO<sub>3</sub>S [M+H]<sup>+</sup> 406.1471, found 406.1461. These data are in agreement with literature data.<sup>[5]</sup>

### 2,2-bis(4-(*tert*-butyl)phenyl)-*N*-tosylpent-4-enamide (5e)

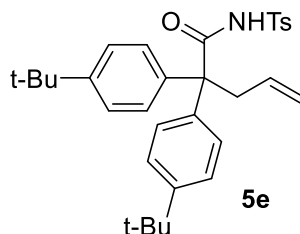

**5e**

White solid, 60% yield. m.p. 176-178 °C, <sup>1</sup>H NMR (360 MHz, CDCl<sub>3</sub>) δ (ppm) 7.86 (b, 1H, NH), 7.7 (d, *J* = 7.2, 2H, Ar-H), 7.33-7.26 (m, 5H, Ar-H), 7.26-7.20 (m, 1H, Ar-H), 7.08 (m, 4H, Ar-H), 5.62-5.46 (m, 1H, CH=CH<sub>2</sub>), 4.92-4.87 (m, 2H, CH=CH<sub>2</sub>), 3.05 (d, *J* = 7.2 Hz, 2H, CH<sub>2</sub>), 2.46 (s, 3H, CH<sub>3</sub>), 1.34 (s, 18H, CH<sub>3</sub>). <sup>13</sup>C NMR (91 MHz, CDCl<sub>3</sub>) δ (ppm) 171.9, 150.7, 145.0, 137.2, 135.2, 133.7, 129.5, 128.7, 128.6, 125.7, 124.9, 118.9, 60.9, 42.7, 31.4, 31.3, 21.8. HRMS (ESI) *m/z* calcd for C<sub>32</sub>H<sub>40</sub>NO<sub>3</sub>S [M+H]<sup>+</sup> 518.2729, found 518.2704.

**Representative procedure for the preparation of compound 5i:**<sup>[9]</sup> 2,2-diphenylpent-4-enoic acid (3.85 g 15.3 mmol) was dissolved in dry dichloromethane (30 mL), followed by addition of two drops of DMF and SOCl<sub>2</sub> (1.5 mL, 20.7 mmol). After 2 h, the volatiles and solvent were evaporated and the resulting acyl chloride was obtained. To the acyl chloride was then added NH<sub>4</sub>OH (35% in aqueous solution, 27 mL, 270 mmol), and the resulting mixture was stirred for 16 h at r.t. and extracted with ethyl acetate. The combined organic layers were dried over Na<sub>2</sub>SO<sub>4</sub>, filtered, and evaporated under reduced pressure. The residue was purified by column chromatography on silica gel (petroleum ether/ethyl acetate 5:1) to give **5i**.

**2,2-diphenylpent-4-enamide (5i)**<sup>[10]</sup>

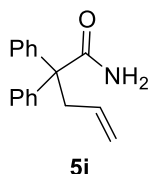

White solid, 86% yield. m.p. 78-80 °C, <sup>1</sup>H NMR (360 MHz, CDCl<sub>3</sub>)  $\delta$  (ppm) 7.27-7.18 (m, 10H, Ar-H), 5.68 (ddt,  $J$  = 17.1, 10.3, 6.8 Hz, 1H, CH=CH<sub>2</sub>), 5.48 (b, 1H, NH), 4.96-4.87 (m, 2H, CH=CH<sub>2</sub>), 3.16-3.13 (dt,  $J$  = 6.8, 1.3 Hz, 2H, CH<sub>2</sub>). <sup>13</sup>C NMR (91 MHz, CDCl<sub>3</sub>)  $\delta$  (ppm) 176.8, 142.9, 135.1, 129.1, 128.4, 127.2, 118.1, 60.6, 43.3. HRMS (ESI)  $m/z$  calcd for C<sub>7</sub>H<sub>18</sub>NO [M+H]<sup>+</sup> 252.1383, found 252.1377. These data are in agreement with literature data.<sup>[10]</sup>

**Representative procedure for the preparation of compound 5f.** 2,2-diphenylpent-4-enoic acid (3.85 g 15.3 mmol) was dissolved in dry dichloromethane (30 mL), followed by addition of two drops of DMF and SOCl<sub>2</sub> (1.5 mL, 20.7 mmol). After 2 h, the volatiles and solvent were evaporated and the resulting acyl chloride was obtained. To the acyl chloride was then added methanesulfonamide (1.75 g, 18.4 mmol), and the resulting mixture was stirred for 16 h at r.t. and extracted with ethyl acetate. The combined organic layers were dried over Na<sub>2</sub>SO<sub>4</sub>, filtered, and evaporated under reduced pressure. The residue was purified by column chromatography on silica gel (petroleum ether/ethyl acetate 5:1) to give **5f**. Compounds **5g**, **5h**, **5j**, and **5k**, were prepared according to the representative procedure from **5f**.

**N-(methanesulfonyl)-2,2-diphenylpent-4-enamide (5f)**<sup>[8]</sup>

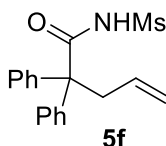

Colourless oil, 46% yield. <sup>1</sup>H NMR (360 MHz, CDCl<sub>3</sub>)  $\delta$  (ppm) 7.71 (b, 1H, NH), 7.36-7.21 (m, 10H, Ar-H), 5.65-5.54 (m, 1H, CH=CH<sub>2</sub>), 4.97-4.92 (m, 2H, CH=CH<sub>2</sub>), 3.16 (d,  $J$  = 7.5 Hz, 2H, CH<sub>2</sub>), 3.15 (s, 3H, CH<sub>3</sub>). <sup>13</sup>C NMR (91 MHz, CDCl<sub>3</sub>)  $\delta$  (ppm) 173.2, 140.4, 133.5, 129.0, 128.9, 128.0, 119.4, 61.7, 42.9, 41.4. HRMS (ESI)  $m/z$  calcd for C<sub>18</sub>H<sub>19</sub>NO<sub>3</sub>NaS [M+Na]<sup>+</sup> 352.0978, found 352.0965. These data are in agreement with literature data.<sup>[8]</sup>

**2,2-diphenyl-N-(phenylsulfonyl)pent-4-enamide (5g)**

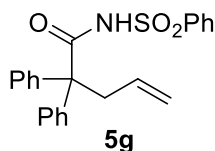

White solid, 66% yield. m.p. 148 - 150 °C, <sup>1</sup>H NMR (360 MHz, CDCl<sub>3</sub>)  $\delta$  (ppm) 7.86 (d,  $J$  = 7.5 Hz 2H, Ar-H), 7.65 (t,  $J$  = 7.5 Hz, 1H, Ar-H), 7.50 (t,  $J$  = 7.8 Hz, 2H, Ar-H), 7.31-7.24 (m, 6H, Ar-H), 7.16-7.11 (m, 4H, Ar-H), 5.56-5.46 (ddt,  $J$  = 16.9, 10.3, 7 Hz, 1H, CH=CH<sub>2</sub>), 4.89-4.83 (m, 2H, CH=CH<sub>2</sub>), 3.06 (d,  $J$  = 7.0 Hz, 2H, CH<sub>2</sub>). <sup>13</sup>C NMR (91 MHz, CDCl<sub>3</sub>)  $\delta$  (ppm) 171.5, 140.2, 138.0, 134.0, 133.4, 128.9, 128.5, 127.9, 119.2, 61.7, 42.8. HRMS (ESI)  $m/z$  calcd for C<sub>23</sub>H<sub>21</sub>NO<sub>3</sub>NaS [M+Na]<sup>+</sup> 414.1134, found 414.1113.



***N*-((4-methoxyphenyl)sulfonyl)-2,2-diphenylpent-4-enamide (5h)**

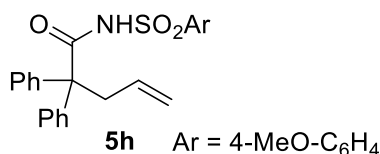

White solid, 49% yield. m.p. 148- 52 °C, <sup>1</sup>H NMR (360 MHz, CDCl<sub>3</sub>) δ (ppm) 7.72 (d, *J* = 8.6 Hz, 1H, Ar-H), 7.36 (d, *J* = 8.6 Hz, 1H, Ar-H). 7.20-7.12 (m, 10H, Ar-H), 5.51-5.40 (m, 1H, CH=CH<sub>2</sub>), 4.82-4.78 (m, 2H, CH=CH<sub>2</sub>), 4.78 (s, 3H, CH<sub>3</sub>) 3.03 (d, *J* = 7.0 Hz, 2H, CH<sub>2</sub>). <sup>13</sup>C NMR (91 MHz, CDCl<sub>3</sub>) δ (ppm) 171.5, 164.0, 140.3, 133.5, 130.9, 129.4, 128.9, 127.9, 119.2, 114.1, 61.6, 55.9, 42.8. HRMS (ESI) *m/z* calcd for C<sub>23</sub>H<sub>21</sub>NO<sub>3</sub>NaS [M+Na]<sup>+</sup> 444.1245, found 444.1258.

***N*-benzyl-2,2-diphenylpent-4-enamide (5j)<sup>[10]</sup>**

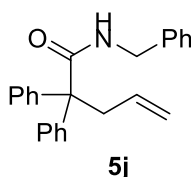

White solid, 89% yield. m.p. 138-140 °C, <sup>1</sup>H NMR (360 MHz, CDCl<sub>3</sub>) δ (ppm) 7.20-7.05 (m, 13H, Ar-H), 6.94-6.91 (m, 2H, Ar-H), 5.70 (b, 1H, NH), 5.61 (ddt, *J* = 17.1, 10.2, 6.8 Hz 1H, CH=CH<sub>2</sub>), 4.92-4.84 (m, 2H, CH=CH<sub>2</sub>), 4.30 (d, *J* = 5.6 Hz, 2H, NHCH<sub>2</sub>), 3.17 (d, *J* = 6.8 Hz, 2H, CH<sub>2</sub>CH=CH<sub>2</sub>). <sup>13</sup>C NMR (91 MHz, CDCl<sub>3</sub>) δ (ppm) 174.1, 143.0, 138.3, 135.3, 129.2, 128.7, 128.4, 127.5, 127.4, 127.2, 118.0, 60.8, 44.0, 43.5. HRMS (ESI) *m/z* calcd for C<sub>24</sub>H<sub>24</sub>NO [M+H]<sup>+</sup> 342.1852, found 342.1842. These data are in agreement with literature data.<sup>[10]</sup>

**2,2-diphenyl-*N*-((trifluoromethyl)sulfonyl)pent-4-enamide (5k)**

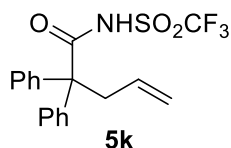

White solid, 64% yield. m.p. 70-76 °C, <sup>1</sup>H NMR (300 MHz, CDCl<sub>3</sub>) δ (ppm) 7.20-7.15 (m, 10H, Ar-H), 5.54 (ddt, *J* = 15.3, 12.0, 6.9 Hz, 1H, CH=CH<sub>2</sub>), 4.87 (d, *J* = 15.3 Hz, 2H, CH=CH<sub>2</sub>), 4.86 (d, *J* = 12.0 Hz, 2H, CH=CH<sub>2</sub>), 3.09 (d, *J* = 6.9 Hz, 2H, CH<sub>2</sub>), 1.73 (b, 1H, NH). <sup>13</sup>C NMR (75 MHz, CDCl<sub>3</sub>) δ (ppm) 184.1, 143.0, 134.9, 129.3, 128.0, 126.8, 117.9, 63.2, 43.0. HRMS (ESI) *m/z* calcd for C<sub>23</sub>H<sub>21</sub>NO<sub>3</sub>NaS [M+Na]<sup>+</sup> 406.0695, found 406.0685.

## 2-Optimization studies for the Sc(OTf)<sub>3</sub>-catalyzed cyclization of alkenoic acid **1b** by heating

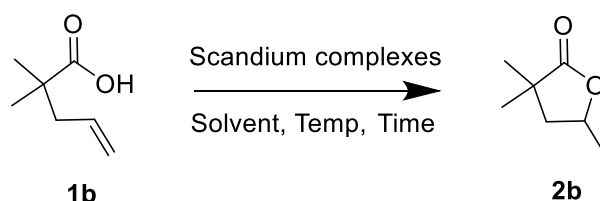

| Entry | catalyst             | Equiv (%) | Solvent            | Temp  | Time | Conv (%) | Yield (%) <sup>a</sup> |
|-------|----------------------|-----------|--------------------|-------|------|----------|------------------------|
| 1     | -                    | -         | Tol                | 110°C | 16 h | 0        | 0                      |
| 2     | CF <sub>3</sub> COOH | 10        | Tol                | 110°C | 16 h | 0        | 0                      |
| 3     | Sc(OAc) <sub>3</sub> | 10        | Tol                | 110°C | 16 h | 0        | 0                      |
| 4     | ScCl <sub>3</sub>    | 10        | Tol                | 110°C | 16 h | 0        | 0                      |
| 5     | Sc(OTf) <sub>3</sub> | 10        | Tol                | 110°C | 16 h | 99       | 91                     |
| 6     | Sc(OTf) <sub>3</sub> | 5         | Tol                | 110°C | 16 h | 69       | 46                     |
| 7     | Sc(OTf) <sub>3</sub> | 1         | Tol                | 110°C | 16 h | 12       | 4                      |
| 8     | Sc(OTf) <sub>3</sub> | 10        | H <sub>2</sub> O   | 100°C | 16 h | 0        | 0                      |
| 9     | Sc(OTf) <sub>3</sub> | 10        | 1,4-dioxane        | 101°C | 16 h | 93       | 78                     |
| 10    | Sc(OTf) <sub>3</sub> | 10        | EtOH               | 78°C  | 16 h | 62       | 0                      |
| 11    | Sc(OTf) <sub>3</sub> | 10        | CH <sub>3</sub> CN | 82°C  | 16 h | 32       | 26                     |
| 12    | Sc(OTf) <sub>3</sub> | 10        | DCE                | 84°C  | 16 h | 87       | 59                     |
| 13    | Sc(OTf) <sub>3</sub> | 10        | Tol                | 80°C  | 16 h | 24       | 22                     |
| 14    | Sc(OTf) <sub>3</sub> | 10        | Tol                | 40°C  | 16 h | 0        | 0                      |
| 18    | Sc(OTf) <sub>3</sub> | 10        | Tol                | 110°C | 8h   | 81       | 59                     |

**Table S1.** Optimization studies for the Sc(OTf)<sub>3</sub>-catalyzed cyclization of **1b**. <sup>a</sup> yields were determined by <sup>1</sup>H NMR using 1,3,5-trimethoxybenzene as internal standard.

## 3-Cyclization Products

### 5-methyldihydrofuran-2(3H)-one (**2a**)<sup>[11]</sup>

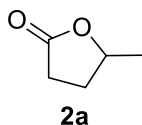

Colorless oil, 82 mg, 79% isolated yield. <sup>1</sup>H NMR (360 MHz, CDCl<sub>3</sub>) δ (ppm) 4.64-4.55 (m, 1H, CH), 2.56-2.44 (m, 2H, CH<sub>2</sub>), 2.39-2.25 (m, 1H, CH<sub>2</sub>), 1.85-1.71 (m, 1H, CH<sub>2</sub>), 1.36 (d, *J* = 6.2 Hz, 3H, CH<sub>3</sub>). <sup>13</sup>C NMR (91 MHz, CDCl<sub>3</sub>) δ (ppm) 177.3, 77.3, 29.7, 29.1, 21.0. HRMS (ESI) *m/z* calcd for C<sub>5</sub>H<sub>9</sub>O<sub>2</sub> [M+H]<sup>+</sup> 101.0597, found 101.0598. These data are in agreement with literature data.<sup>[11]</sup>

### 3,3,5-trimethyldihydrofuran-2(3H)-one (**2b**)<sup>[12]</sup>

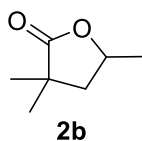

Colorless oil, 88 mg, 69% isolated yield (under thermal conditions) and 80 mg, 62% yield (under microwave conditions). <sup>1</sup>H NMR (360 MHz, CDCl<sub>3</sub>) δ (ppm) 4.74-4.60 (m, 1H, CH), 2.20 (dd, *J* = 12.8 Hz, 5.7 Hz, 1H, CH<sub>2</sub>), 1.74 (dd, *J* = 12.8 Hz, 9.8 Hz, 1H, CH<sub>2</sub>), 1.40 (d, *J* = 6.1 Hz, 3H, CH<sub>3</sub>), 1.27

(s, 3H, CH<sub>3</sub>), 1.25 (s, 3H, CH<sub>3</sub>). <sup>13</sup>C NMR (91 MHz, CDCl<sub>3</sub>) δ (ppm) 182.7, 73.9, 45.2, 41.1, 25.1, 24.3, 21.1. HRMS (ESI) *m/z* calcd for C<sub>7</sub>H<sub>13</sub>O<sub>2</sub> [M+H]<sup>+</sup> 129.0910, found 129.0907. These data are in agreement with literature data.<sup>[12]</sup>

**3-methyl-2-oxaspiro[4.5]decan-1-one (2c)<sup>[12]</sup>**

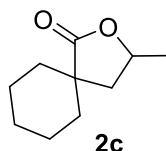

Slightly yellow solid, 70 mg, 83% isolated yield. m.p. 66-68 °C, <sup>1</sup>H NMR (360 MHz, CDCl<sub>3</sub>) δ (ppm) 4.51 (pd, *J* = 6.1, 3.8 Hz, 1H, CH), 2.37 (dd, *J* = 12.5, 6.1 Hz, 1H, CH<sub>2</sub>), 1.81 (dd, *J* = 12.5, 3.8 Hz, 1H, CH<sub>2</sub>), 1.78-1.65 (m, 2H, Cy-CH<sub>2</sub>), 1.63-1.51 (m, 4H, CH<sub>2</sub>, Cy-CH<sub>2</sub>), 1.50-1.42 (m, 1H, CH<sub>2</sub>, Cy-CH<sub>2</sub>), 1.37 (d, *J* = 6.1 Hz, 3H, CH<sub>3</sub>), 1.34-1.15 (m, 3H, Cy-CH<sub>2</sub>). <sup>13</sup>C NMR (91 MHz, CDCl<sub>3</sub>) δ (ppm) 181.7, 73.7, 45.5, 41.3, 34.4, 31.6, 25.4, 22.2, 22.2, 21.5. HRMS (ESI) *m/z* calcd for C<sub>10</sub>H<sub>17</sub>O<sub>2</sub> [M+H]<sup>+</sup> 169.1223, found 169.1218. These data are in agreement with literature data.<sup>[12]</sup>

**5-methyl-3,3-diphenyldihydrofuran-2(3H)-one (2d)<sup>[12]</sup>**

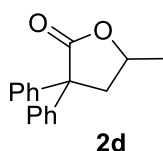

White solid, 156 mg, 62% yield (under thermal conditions) and 174 mg, 69% yield (under microwave conditions). m.p. 110-112 °C. <sup>1</sup>H NMR (360 MHz, CDCl<sub>3</sub>) δ (ppm) 7.36-7.10 (m, 10H, Ar-H), 4.48-4.34 (m, 1H, CH), 2.99 (dd, *J* = 12.9, 4.4 Hz, 1H, CH<sub>2</sub>), 2.52 (dd, *J* = 12.9, 11.1 Hz, 1H, CH<sub>2</sub>), 1.39 (d, *J* = 6 Hz, 3H, CH<sub>3</sub>). <sup>13</sup>C NMR (91 MHz, CDCl<sub>3</sub>) δ (ppm) 177.3, 142.2, 140.1, 129.0, 128.5, 127.8, 127.6, 127.5, 127.3, 73.7, 58.8, 45.5, 20.5. HRMS (ESI) *m/z* calcd for C<sub>17</sub>H<sub>17</sub>O<sub>2</sub> [M+H]<sup>+</sup> 253.1223, found 253.1222. These data are in agreement with literature data.<sup>[12]</sup>

**3,3-bis(4-(*tert*-butyl)phenyl)-5-methyldihydrofuran-2(3H)-one (2e)**

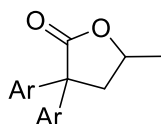

**2e** Ar = 4-*t*-BuC<sub>6</sub>H<sub>4</sub>

Slightly yellow solid, 37 mg, 51% isolated yield. m.p. 165-167 °C, <sup>1</sup>H NMR (360 MHz, CDCl<sub>3</sub>) δ (ppm) 7.31-7.12 (m, 8H, Ar-H), 4.46-4.35 (m, 1H, CH), 2.97 (dd, *J* = 12.8, 4.7 Hz, 1H, CH<sub>2</sub>), 2.47 (dd, *J* = 12.8, 10.6 Hz, 1H, CH<sub>2</sub>), 1.38 (d, *J* = 6.2 Hz, 3H, CH<sub>3</sub>), 1.23 (s, 9H, CH<sub>3</sub>), 1.21 (s, 9H, CH<sub>3</sub>). <sup>13</sup>C NMR (91 MHz, CDCl<sub>3</sub>) δ (ppm) 177.8, 150.6, 149.9, 139.4, 136.7, 127.4, 127.1, 125.9, 125.3, 73.7, 58.1, 45.7, 34.6, 34.5, 31.4, 20.5. HRMS (ESI) *m/z* calcd for C<sub>25</sub>H<sub>33</sub>O<sub>2</sub> [M+H]<sup>+</sup> 365.2481, found 365.2460.

**3,5-dimethyl-3-phenyldihydrofuran-2(3H)-one (2f)**

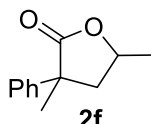

Yellow oil, 89 mg, 94% isolated yield, mixture of 2 diastereomers. **2f-(diastereomer 1)** 56 mg, 59% isolated yield. <sup>1</sup>H NMR (360 MHz, CDCl<sub>3</sub>) δ (ppm) 7.38-7.25 (m, 5H, Ar-H), 4.40-4.28 (m, 1H, CH), 2.78 (dd, *J* = 12.9, 4.9 Hz, 1H, CH<sub>2</sub>), 1.97 (dd, *J* = 12.9, 10.7 Hz, 1H, CH<sub>2</sub>), 1.59 (s, 3H, CH<sub>3</sub>), 1.41 (d, *J* = 6.1 Hz, 3H, CH<sub>3</sub>). <sup>13</sup>C NMR (91 MHz, CDCl<sub>3</sub>) δ (ppm) 179.6, 141.1, 129.0, 127.5, 125.8, 73.7, 50.5, 46.1, 26.5, 20.5. **2f-(diastereomer 2)** 33 mg, 35% isolated yield. <sup>1</sup>H NMR (360 MHz, CDCl<sub>3</sub>) δ (ppm) 7.51-7.45 (m, 2H, Ar-H), 7.40-7.33 (m, 2H, Ar-H), 7.31-7.24 (m, 1H, Ar-H), 4.71 (pd,

$J = 8.9, 6.1$  Hz 1H, CH), 2.55-2.53 (dd,  $J = 12.8, 6.1$  Hz, 1H, CH<sub>2</sub>), 2.29 (dd,  $J = 12.8, 8.9$  Hz, 1H, CH<sub>2</sub>), 1.64 (s, 3H, CH<sub>3</sub>), 1.40 (d,  $J = 6.2$  Hz, 3H, CH<sub>3</sub>). <sup>13</sup>C NMR (91 MHz, CDCl<sub>3</sub>)  $\delta$  (ppm) 179.7, 142.9, 128.8, 127.2, 126.2, 73.7, 48.7, 46.0, 25.4, 21.2. HRMS (ESI)  $m/z$  calcd for C<sub>12</sub>H<sub>15</sub>O<sub>2</sub> [M+H]<sup>+</sup> 191.1067, found 191.1063.

**3-methylisobenzofuran-1(3H)-one (2g)**<sup>[13]</sup>

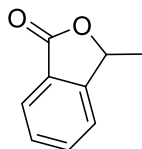

**2g**

Colorless oil, 89% yield. <sup>1</sup>H NMR (250 MHz, CDCl<sub>3</sub>)  $\delta$  (ppm) 7.90 (d,  $J = 7.6$  Hz, 1H), 7.68 (td,  $J = 7.5, 1.0$  Hz, 1H), 7.53 (t,  $J = 7.4$  Hz, 1H), 7.44 (d,  $J = 7.6$  Hz, 1H), 5.57 (q,  $J = 6.7$  Hz, 1H), 1.64 (d,  $J = 6.7$  Hz, 3H). <sup>13</sup>C NMR (91 MHz, CDCl<sub>3</sub>)  $\delta$  (ppm) 170.5, 151.3, 134.1, 129.1, 125.8, 127.7, 121.7, 77.8, 20.5. HRMS (ESI)  $m/z$  calcd for C<sub>9</sub>H<sub>9</sub>O<sub>2</sub> [M+H]<sup>+</sup> 149.0601, found 149.0597. These data are in agreement with literature data.<sup>[13]</sup>

**6-methyl-3,3-diphenyltetrahydro-2H-pyran-2-one (2h)**<sup>[5]</sup>

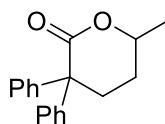

**2h**

White solid, 73% yield. mp = 101 °C. <sup>1</sup>H NMR (250 MHz, CDCl<sub>3</sub>)  $\delta$  (ppm) 7.46-7.17 (m, 10H), 4.45-4.14 (m, 1H), 2.83-2.73 (m, 1H), 2.69-2.62 (m, 1H), 1.98-1.93 (m, 1H), 1.79-1.68 (m, 1H), 1.38 (d,  $J = 7.0$  Hz, 3H). These data are in agreement with literature data.<sup>[5]</sup>

**5-ethyl-3,3-diphenyldihydrofuran-2(3H)-one (2i)**<sup>[5]</sup>

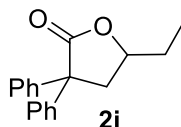

**2i**

Colorless oil, 74% yield. <sup>1</sup>H NMR (250 MHz, CDCl<sub>3</sub>)  $\delta$  (ppm) 7.51-7.14 (m, 10H), 4.39-4.22 (m, 1H), 2.92-2.78 (m, 1H), 2.72-2.55 (m, 1H), 1.89-1.66 (m, 2H), 1.05 (t,  $J = 7.4$  Hz, 3H). These data are in agreement with literature data.<sup>[5]</sup>

**Hexahydro-2H-cyclopenta[b]furan-2-one (3j)**<sup>[14]</sup>

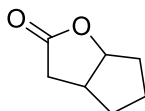

**3j**

Colorless oil, 79% yield. <sup>1</sup>H NMR (250 MHz, CDCl<sub>3</sub>)  $\delta$  (ppm) 5.00 (t,  $J = 5.6$  Hz, 1H), 2.93-2.74 (m, 2H), 2.28 (d,  $J = 15.6$  Hz, 1H), 2.09-1.98 (m, 1H), 1.92-1.61 (m, 4H), 1.59-1.46 (m, 1H). These data are in agreement with literature data.<sup>[14]</sup>

**1,4-diphenyl-1,2,3,4-tetrahydronaphthalene-1-carboxylic acid (4m)**

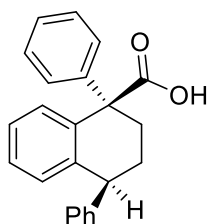

**4m**

White solid, 91% yield (under thermic conditions) and 58% yield (under microwave conditions). m.p. 203-205 °C,  $^1\text{H}$  NMR (360 MHz,  $\text{CDCl}_3$ )  $\delta$  (ppm) 11.75 (b, 1H, OH), 7.33-7.13 (m, 13H, Ar-H), 6.98-6.96 (m, 1H, Ar-H), 4.22 (t,  $J = 6.5$  Hz, 1H, CH), 2.88-2.83 (m, 1H,  $\text{CH}_2$ ), 2.13-1.91 (m, 3H,  $\text{CH}_2$ ).  $^{13}\text{C}$  NMR (91 MHz,  $\text{CDCl}_3$ )  $\delta$  (ppm) 181.0, 147.1, 145.7, 140.3, 131.2, 130.6, 129.0, 128.5, 128.4, 128.1, 127.4, 126.7, 126.2, 57.8, 45.8, 34.6, 29.8. HRMS (ESI)  $m/z$  calcd for  $\text{C}_{23}\text{H}_{20}\text{O}_2\text{Na}$   $[\text{M}+\text{Na}]^+$  351.1355, found 351.1351.

**6-(tert-butyl)-1-(4-(tert-butyl)phenyl)-4-phenyl-1,2,3,4-tetrahydronaphthalene-1-carboxylic acid (4n)**

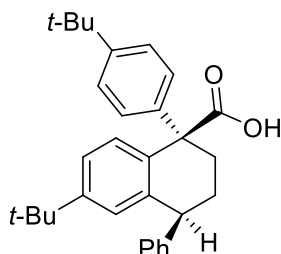

**4n**

White solid, 86 mg, 98% isolated yield. m.p. 230-232 °C,  $^1\text{H}$  NMR (360 MHz,  $\text{CDCl}_3$ )  $\delta$  (ppm) 11.63 (b, 1H, OH), 7.35-7.28 (m, 5H, Ar-H), 7.24 (td,  $J = 7.8, 1.9$ , 2H, Ar-H), 7.17 (d,  $J = 7.3$  Hz, 2H, Ar-H), 7.07 (d,  $J = 8.7$  Hz, 2H, Ar-H), 6.99 (d,  $J = 1.9$  Hz, 1H, Ar-H), 4.23 (t,  $J = 6.4$  Hz, 1H, CH), 2.85-2.78 (m, 1H,  $\text{CH}_2$ ), 1.98-1.69 (m, 3H,  $\text{CH}_2$ ), 1.35 (s, 9H,  $\text{CH}_3$ ), 1.24 (s, 9H,  $\text{CH}_3$ ).  $^{13}\text{C}$  NMR (91 MHz,  $\text{CDCl}_3$ )  $\delta$  (ppm) 181.3, 150.1, 149.4, 147.3, 142.4, 139.6, 134.0, 130.6, 129.1, 128.4, 128.0, 127.5, 126.1, 125.0, 123.5, 56.7, 45.8, 34.5, 34.2, 31.5, 31.4, 29.7. HRMS (ESI)  $m/z$  calcd for  $\text{C}_{31}\text{H}_{36}\text{O}_2\text{Na}$   $[\text{M}+\text{Na}]^+$  463.2613, found 463.2585.

**6-methoxy-1-(4-methoxyphenyl)-4-phenyl-1,2,3,4-tetrahydronaphthalene-1-carboxylic acid (4o)**

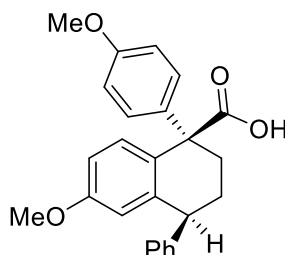

**4o**

Slightly yellow solid, 73 mg, 95% isolated yield. m.p. 176-178 °C,  $^1\text{H}$  NMR (360 MHz,  $\text{CDCl}_3$ )  $\delta$  (ppm) 11.72 (b, 1H, OH), 7.32-7.20 (m, 4H, Ar-H), 7.15 (d,  $J = 7.5$  Hz, 2H, Ar-H), 7.05 (d,  $J = 8.3$  Hz, 2H, Ar-H), 6.84 (d,  $J = 8.3$  Hz, 2H, Ar-H), 6.76 (dd,  $J = 8.7, 2.5$  Hz, 1H, Ar-H), 6.47 (d,  $J = 2.3$  Hz, 1H, Ar-H), 4.16 (t,  $J = 6.2$  Hz, 1H, CH), 3.80 (s, 3H,  $\text{OCH}_3$ ), 3.68 (s, 3H,  $\text{OCH}_3$ ), 2.83-2.76 (m, 1H,  $\text{CH}_2$ ), 2.05-1.99 (m, 2H,  $\text{CH}_2$ ), 1.95-1.86 (m, 1H,  $\text{CH}_2$ ).  $^{13}\text{C}$  NMR (91 MHz,  $\text{CDCl}_3$ )  $\delta$  (ppm) 181.7, 158.6, 158.3, 146.8, 141.7, 137.7, 132.2, 129.4, 129.1, 128.5, 126.3, 114.9, 113.5, 112.9, 56.2, 55.4, 55.2, 45.9, 34.4, 29.5. HRMS (ESI)  $m/z$  calcd for  $\text{C}_{25}\text{H}_{24}\text{O}_4\text{Na}$   $[\text{M}+\text{Na}]^+$  411.1567, found 411.1561.

**4,4-dimethyl-1-phenyl-1,2,3,4-tetrahydronaphthalene-1-carboxylic acid (4p)**

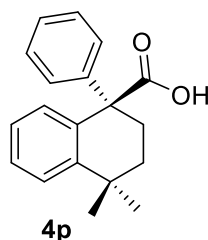

Colourless oil, 90% yield.  $^1\text{H}$  RMN (400 MHz,  $\text{CDCl}_3$ )  $\delta$  (ppm) 10.25 (b, 1H, COOH), 7.35 (d, 1H,  $J = 7.7$  Hz, Ar-H), 7.22-7.20 (m, 6H, Ar-H), 7.02 (t, 1H,  $J = 7.2$  Hz, Ar-H), 6.96 (d, 2H,  $J = 7.2$  Hz, Ar-H), 2.70-2.62 (m 1H,  $\text{CH}_2$ ), 2.10-2.03 (m, 1H,  $\text{CH}_2$ ), 1.66-1.58 (m, 1H,  $\text{CH}_2$ ), 1.44-1.37 (m, 1H,  $\text{CH}_2$ ), 1.28 (s,  $\text{CH}_3$ ), 1.21 (s,  $\text{CH}_3$ ).  $^{13}\text{C}$  RMN (100.6 MHz,  $\text{CDCl}_3$ )  $\delta$  (ppm) 181.6, 146.9, 145.6, 135.1, 131.2, 128.4, 128.1, 127.8, 127.0, 126.7, 125.6, 57.9, 35.2, 34.1, 33.3, 32.1 31.8. HRMS (ESI)  $m/z$  calcd for  $\text{C}_{19}\text{H}_{20}\text{O}_2\text{Na}$   $[\text{M}+\text{Na}]^+$  303.1356 found 303.1353.

**Methyl 1,4-diphenyl-1,2,3,4-tetrahydronaphthalene-1-carboxylate (4q)**

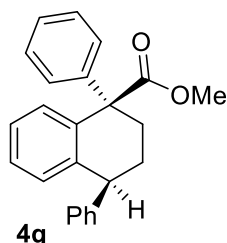

Colourless oil, 93% yield,  $^1\text{H}$  NMR (360 MHz,  $\text{CDCl}_3$ )  $\delta$  (ppm) 7.35-7.20 (m, 7H, Ar-H), 7.17-7.14 (m, 4H, Ar-H), 7.09-7.07 (m, 2H, Ar-H), 6.96-6.93 (m, 1H, Ar-H), 4.22 (dd,  $J = 8.1, 6.1$  Hz, 1H, CH), 3.83 (s, 3H,  $\text{CH}_3$ ), 2.90-2.83 (m, 1H,  $\text{CH}_2$ ), 2.13-2.05 (m, 2H,  $\text{CH}_2$ ), 1.97-1.87 (m, 1H,  $\text{CH}_2$ ).  $^{13}\text{C}$  NMR (91 MHz,  $\text{CDCl}_3$ )  $\delta$  (ppm) 175.7, 147.2, 146.2, 140.5, 137.7, 131.4, 130.5, 129.0, 128.5, 128.2, 127.3, 126.7, 126.2, 126.1, 57.8, 52.7, 45.9, 35.1, 30.1. HRMS (ESI)  $m/z$  calcd for  $\text{C}_{24}\text{H}_{23}\text{O}_2$   $[\text{M}+\text{H}]^+$  343.1693, found 343.1678.

**3,3,5-trimethyl-1-tosylpyrrolidin-2-one (6a)<sup>[15]</sup>**

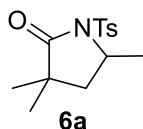

White solid, 41 mg, 28% isolated yield. m.p. 87-89  $^{\circ}\text{C}$ , IR (neat,  $\text{cm}^{-1}$ )  $\nu$  1727 ( $\text{C}=\text{O}$ ).  $^1\text{H}$  NMR (360 MHz,  $\text{CDCl}_3$ )  $\delta$  (ppm) 7.92 (d,  $J = 8.4$  Hz, 2H, Ar-H), 7.31 (d,  $J = 8.4$  Hz, 2H, Ar-H), 4.34-4.25 (m, 1H, CH), 2.42 (s, 3H,  $\text{CH}_3$ ), 2.13 (dd,  $J = 13.0, 7.9$  Hz, 1H,  $\text{CH}_2$ ), 1.58-1.52 (m, 1H,  $\text{CH}_2$ ), 1.55 (d,  $J = 6.1$  Hz, 3H,  $\text{CH}_3$ ), 1.14 (s, 3H,  $\text{CH}_3$ ), 1.00 (s, 3H,  $\text{CH}_3$ ).  $^{13}\text{C}$  NMR (91 MHz,  $\text{CDCl}_3$ )  $\delta$  (ppm) 179.1, 144.9, 136.1, 129.6, 128.3, 53.3, 42.4, 41.3, 25.3, 23.1, 21.8. HRMS (ESI)  $m/z$  calcd for  $\text{C}_{14}\text{H}_{20}\text{NO}_3\text{S}$   $[\text{M}+\text{H}]^+$  282.1158, found 282.1155. These data are in agreement with literature data.<sup>[15]</sup>

**4-methyl-N-(3,3,5-trimethyldihydrofuran-2(3H)-ylidene)benzenesulfonamide (7a)<sup>[16]</sup>**

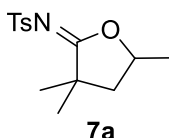

Yellow solid, 89 mg, 61% isolated yield. m.p. 143-145  $^{\circ}\text{C}$ . IR (neat,  $\text{cm}^{-1}$ )  $\nu$  1618 ( $\text{C}=\text{N}$ ).  $^1\text{H}$  NMR (360 MHz,  $\text{CDCl}_3$ )  $\delta$  (ppm) 7.85 (d,  $J = 8.2$  Hz, 2H, Ar-H), 7.26 (d,  $J = 8.2$  Hz, 2H, Ar-H), 4.84-4.75 (m, 1H, CH), 2.41 (s, 3H,  $\text{CH}_3$ ), 2.13 (dd,  $J = 12.8, 5.8$  Hz, 1H,  $\text{CH}_2$ ), 1.64 (dd,  $J = 12.7, 10.1$  Hz, 1H,  $\text{CH}_2$ ), 1.40 (d,  $J = 6.2$  Hz, 3H,  $\text{CH}_3$ ), 1.26 (s, 3H,  $\text{CH}_3$ ), 1.25 (s, 3H,  $\text{CH}_3$ ).  $^{13}\text{C}$  NMR (91 MHz,  $\text{CDCl}_3$ )  $\delta$  (ppm) 180.0, 143.2, 138.7, 129.1, 127.6, 81.3, 45.1, 44.8, 25.9, 25.7, 21.7, 20.7. HRMS (ESI)  $m/z$

calcd for  $C_{14}H_{20}NO_3S$   $[M+H]^+$  282.1158, found 282.1147. These data are in agreement with literature data.<sup>[16]</sup>

**3-methyl-2-tosyl-2-azaspiro[4.5]decan-1-one (6b)<sup>[15]</sup>**

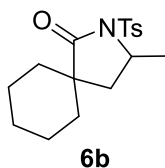

Yellow oil, 7 mg, 11% isolated yield. IR (neat,  $cm^{-1}$ )  $\nu$  1731 (C=O).  $^1H$  NMR (360 MHz,  $CDCl_3$ )  $\delta$  (ppm) 7.91 (d,  $J = 8.3$  Hz, 2H, Ar-H), 7.30 (d,  $J = 8.3$  Hz, 2H, Ar-H), 4.30 (dq,  $J = 8.3, 6.1, 1.8$  Hz, 1H, CH), 2.42 (s, 3H,  $CH_3$ ), 2.23 (dd,  $J = 13.1, 8.3$  Hz, 1H,  $CH_2$ ), 1.69-1.60 (m, 5H,  $CH_2$ ), 1.54 (d,  $J = 6.1$  Hz, 3H,  $CH_3$ ), 1.41-1.36 (m, 2H,  $CH_2$ ), 1.28-1.22 (m, 4H,  $CH_2$ ).  $^{13}C$  NMR (91 MHz,  $CDCl_3$ )  $\delta$  (ppm) 178.8, 155.0, 144.9, 136.2, 129.6, 128.4, 53.5, 45.7, 38.4, 33.8, 33.1, 25.3, 23.6, 21.9, 21.8, 21.8. HRMS (ESI)  $m/z$  calcd for  $C_{17}H_{24}NO_3S$   $[M+H]^+$  322.1471, found 322.1468. These data are in agreement with literature data.<sup>[15]</sup>

**4-methyl-N-(3-methyl-2-oxaspiro[4.5]decan-1-ylidene)benzenesulfonamide (7b)<sup>[16]</sup>**

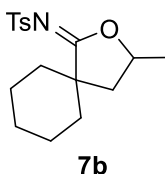

Slightly yellow solid, 34 mg, 52% isolated yield. m.p. 114-116 °C. IR (neat,  $cm^{-1}$ )  $\nu$  1625 (C=N).  $^1H$  NMR (360 MHz,  $CDCl_3$ )  $\delta$  (ppm) 7.85 (d,  $J = 6.8$  Hz, 2H, Ar-H), 7.26 (d,  $J = 6.8$  Hz, 2H, Ar-H), 4.82-4.73 (m, 1H, CH), 2.41 (s, 3H,  $CH_3$ ), 2.37 (dd,  $J = 13.2, 6.2$  Hz, 1H,  $CH_2$ ), 1.85-1.35 (m, 7H,  $CH_2$ ), 1.40 (d,  $J = 6.2$  Hz, 3H,  $CH_3$ ), 1.33-1.14 (m, 4H,  $CH_2$ ).  $^{13}C$  NMR (91 MHz,  $CDCl_3$ )  $\delta$  (ppm) 179.9, 143.1, 138.9, 129.1, 127.5, 81.7, 49.6, 40.2, 35.0, 32.7, 25.1, 22.4, 21.7, 21.0. HRMS (ESI)  $m/z$  calcd for  $C_{17}H_{24}NO_3S$   $[M+H]^+$  322.1471, found 322.1464. These data are in agreement with literature data.<sup>[16]</sup>

**4-methyl-N-(5-methyl-3,3-diphenyldihydrofuran-2(3H)-ylidene)benzenesulfonamide (7c)<sup>[16]</sup>**

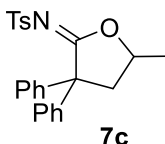

White solid, 74 mg, 79% isolated yield. m.p. 138-140 °C. IR (neat,  $cm^{-1}$ )  $\nu$  1618 (C=N).  $^1H$  NMR (360 MHz,  $CDCl_3$ )  $\delta$  (ppm) 7.85 (d,  $J = 8.3$  Hz, 2H, Ar-H), 7.39-7.20 (m, 12H, Ar-H), 4.77-4.67 (m, 1H, CH), 3.00 (dd,  $J = 13.00, 4.6$  Hz, 1H,  $CH_2$ ), 2.54-2.48 (dd,  $J = 13.00, 10.6$  Hz, 1H,  $CH_2$ ), 2.45 (s, 3H,  $CH_3$ ), 1.52 (d,  $J = 6.1$  Hz, 3H,  $CH_3$ ).  $^{13}C$  NMR (91 MHz,  $CDCl_3$ )  $\delta$  (ppm) 175.5, 143.2, 141.7, 140.2, 138.8, 129.2, 129.0, 128.3, 128.0, 127.6, 127.5, 80.9, 61.4, 45.7, 21.7, 19.9. HRMS (ESI)  $m/z$  calcd for  $C_{24}H_{24}NO_3S$   $[M+H]^+$  406.1471, found 406.1452. These data are in agreement with literature data.<sup>[16]</sup>

**5-methyl-1-tosylpyrrolidin-2-one (6d)<sup>[15]</sup>**

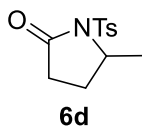

Slightly yellow solid, 21 mg, 38% isolated yield. m.p. 95-97 °C. IR (neat,  $cm^{-1}$ )  $\nu$  1733 (C=O).  $^1H$  NMR (360 MHz,  $CDCl_3$ )  $\delta$  (ppm) 7.93 (d,  $J = 8.4$  Hz, 2H, Ar-H), 7.31 (d,  $J = 8.4$  Hz, 2H, Ar-H), 4.55-4.47 (m, 1H, CH), 2.60-2.50 (m, 1H,  $CH_2$ ), 2.42 (s, 3H,  $CH_3$ ), 2.38-2.22 (m, 2H,  $CH_2$ ), 1.74-1.68 (m, 1H,  $CH_2$ ), 1.45 (d,  $J = 6.4$  Hz, 3H,  $CH_3$ ).  $^{13}C$  NMR (91 MHz,  $CDCl_3$ )  $\delta$  (ppm) 173.4, 145.0, 136.2,

129.6, 128.4, 56.5, 30.7, 26.7, 21.8, 21.6. HRMS (ESI)  $m/z$  calcd for  $C_{12}H_{16}NO_3S$   $[M+H]^+$  254.0845, found 254.0844. These data are in agreement with literature data.<sup>[15]</sup>

**3,3-bis(4-(*tert*-butyl)phenyl)-5-methyl-1-tosylpyrrolidin-2-one (6e)**

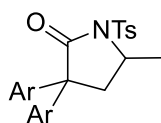

**6e** Ar = 4-*t*-BuC<sub>6</sub>H<sub>4</sub>

White solid, 7 mg, 7% isolated yield. m.p. 151-155 °C. IR (neat, cm<sup>-1</sup>)  $\nu$  1755 (C=O). <sup>1</sup>H NMR (360 MHz, CDCl<sub>3</sub>)  $\delta$  (ppm) 7.84 (d,  $J$  = 8.3 Hz, 2H, Ar-H), 7.24 (d,  $J$  = 8.3 Hz, 2H, Ar-H), 7.19 (d,  $J$  = 8.3 Hz, 2H, Ar-H), 7.07 (d,  $J$  = 8.3 Hz, 2H, Ar-H), 6.99 (d,  $J$  = 8.3 Hz, 2H, Ar-H), 4.26-4.17 (m, 1H, CH), 3.01 (dd,  $J$  = 13.2, 6.5 Hz, 1H, CH<sub>2</sub>), 2.43 (s, 3H, CH<sub>3</sub>), 2.38 (dd,  $J$  = 13.2, 8.0 Hz, 1H, CH<sub>2</sub>), 1.53 (d,  $J$  = 6.1 Hz, 3H, CH<sub>3</sub>), 1.27 (s, 9H, CH<sub>3</sub>), 1.25 (s, 9H, CH<sub>3</sub>). <sup>13</sup>C NMR (75 MHz, CDCl<sub>3</sub>)  $\delta$  (ppm) 175.2, 150.2, 150.0, 144.8, 139.1, 137.1, 135.7, 129.4, 128.6, 127.5, 127.1, 125.6, 125.4, 57.3, 53.8, 42.7, 34.5, 31.4, 31.1, 22.2, 21.8. HRMS (ESI)  $m/z$  calcd for  $C_{32}H_{40}NO_3S$   $[M+H]^+$  518.2723, found 518.2701.

***N*-(3,3-bis(4-(*tert*-butyl)phenyl)-5-methyldihydrofuran-2(3*H*)-ylidene)-4-methylbenzenesulfonamide (7e)**

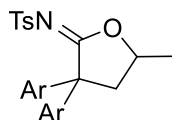

**7e** Ar = 4-*t*-BuC<sub>6</sub>H<sub>4</sub>

White solid, 77 mg, 75% isolated yield. m.p. 94-96 °C. IR (neat, cm<sup>-1</sup>)  $\nu$  1629 (C=N). <sup>1</sup>H NMR (360 MHz, CDCl<sub>3</sub>)  $\delta$  (ppm) 7.83 (d,  $J$  = 8.1 Hz, 2H, Ar-H), 7.32 (d,  $J$  = 8.2 Hz, 2H, Ar-H), 7.26-7.23 (m, 6H, Ar-H), 7.08 (d,  $J$  = 8.2 Hz, 2H, Ar-H), 4.73-4.63 (m, 1H, CH), 2.97 (dd,  $J$  = 12.8, 4.6 Hz, 1H, CH<sub>2</sub>), 2.46-2.41 (m, 1H, CH<sub>2</sub>), 2.43 (s, 3H, CH<sub>3</sub>), 1.44 (d,  $J$  = 6.1 Hz, 3H, CH<sub>3</sub>), 1.29 (s, 9H, CH<sub>3</sub>), 1.28 (s, 9H, CH<sub>3</sub>). <sup>13</sup>C NMR (91 MHz, CDCl<sub>3</sub>)  $\delta$  (ppm) 176.1, 150.8, 150.1, 143.1, 139.0, 138.9, 136.5, 129.1, 127.9, 127.6, 127.3, 125.9, 125.2, 80.9, 60.8, 46.0, 34.6, 34.5, 31.4, 21.7, 20.0. HRMS (ESI)  $m/z$  calcd for  $C_{32}H_{40}NO_3S$   $[M+H]^+$  518.2723, found 518.2700.

***N*-(5-methyl-3,3-diphenyldihydrofuran-2(3*H*)-ylidene)methanesulfonamide (7f)**

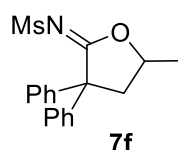

**7f**

White solid, 57 mg, 87% isolated yield. m.p. 132-134 °C. IR (neat, cm<sup>-1</sup>)  $\nu$  1643 (C=N). <sup>1</sup>H NMR (360 MHz, CDCl<sub>3</sub>)  $\delta$  (ppm) 7.26-7.14 (m, 10H, Ar-H), 4.68-4.59 (m, 1H, CH), 2.93 (s, 3H, CH<sub>3</sub>), 2.89 (dd,  $J$  = 13.0, 4.5 Hz, 1H, CH<sub>2</sub>), 2.56 (dd,  $J$  = 13.0, 10.7 Hz, 1H, CH<sub>2</sub>), 1.49 (d,  $J$  = 6.2 Hz, 3H, CH<sub>3</sub>). <sup>13</sup>C NMR (91 MHz, CDCl<sub>3</sub>)  $\delta$  (ppm) 175.5, 141.5, 140.3, 129.1, 129.0, 128.9, 128.3, 128.09, 127.5, 81.0, 61.3, 45.7, 42.6, 20.0. HRMS (ESI)  $m/z$  calcd for  $C_{18}H_{20}NO_3S$   $[M+H]^+$  330.1158, found 330.1150.

**5-methyl-3,3-diphenyl-1-(phenylsulfonyl)pyrrolidin-2-one (6g)**

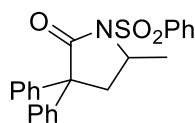

**6g**

Yellow oil, 9 mg, 12% isolated yield. IR (neat, cm<sup>-1</sup>)  $\nu$  1733 (C=O). <sup>1</sup>H NMR (360 MHz, CDCl<sub>3</sub>)  $\delta$  (ppm) 7.96 (d,  $J$  = 7.7 Hz, 2H, Ar-H), 7.61 (t,  $J$  = 7.5 Hz, 1H, Ar-H), 7.45 (t,  $J$  = 8.0 Hz, 2H, Ar-H), 7.24-7.13 (m, 8H, Ar-H), 7.07-7.04 (m, 2H, Ar-H), 4.32-4.23 (m, 1H, CH), 3.06 (dd,  $J$  = 13.2, 6.5 Hz,



1H, CH<sub>2</sub>), 2.44 (dd, *J* = 13.2, 7.4 Hz, 1H, CH<sub>2</sub>), 1.53 (d, *J* = 6.2 Hz, 3H, CH<sub>3</sub>). <sup>13</sup>C NMR (91 MHz, CDCl<sub>3</sub>) δ (ppm) 74.7, 142.1, 140.0, 138.3, 133.9, 128.9, 128.8, 128.6, 128.5, 127.8, 127.5, 127.4, 127.3, 58.0, 53.9, 42.4, 22.1. HRMS (ESI) *m/z* calcd for C<sub>23</sub>H<sub>22</sub>NO<sub>3</sub>S [M+H]<sup>+</sup> 392.1315, found 392.1296.

***N*-(5-methyl-3,3-diphenyldihydrofuran-2(3*H*)-ylidene)benzenesulfonamide (7g)**

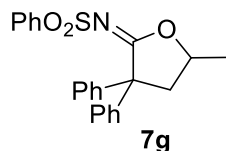

White solid, 56 mg, 72% isolated yield. m.p. 121-123 °C, IR (neat, cm<sup>-1</sup>) ν 1630 (C=N). <sup>1</sup>H NMR (360 MHz, CDCl<sub>3</sub>) δ (ppm) 7.87-7.84 (m, 2H, Ar-H), 7.48-7.44 (m, 1H, Ar-H), 7.40-7.35 (m, 2H, Ar-H), 7.24-7.09 (m, 10H, Ar-H), 4.65-4.56 (m, 1H, CH), 2.93 (dd, *J* = 13.0, 4.6 Hz, 1H, CH<sub>2</sub>), 2.50 (dd, *J* = 13.0, 10.7 Hz, 1H, CH<sub>2</sub>), 1.39 (d, *J* = 6.2 Hz, 3H, CH<sub>3</sub>). <sup>13</sup>C NMR (91 MHz, CDCl<sub>3</sub>) δ (ppm) 175.8, 141.6, 141.5, 140.0, 132.5, 129.0, 128.5, 128.2, 128.0, 127.5, 127.3, 127.2, 81.0, 61.4, 45.6, 19.9. HRMS (ESI) *m/z* calcd for C<sub>23</sub>H<sub>22</sub>NO<sub>3</sub>S [M+H]<sup>+</sup> 392.1315, found 392.1298.

**1-((4-methoxyphenyl)sulfonyl)-5-methyl-3,3-diphenylpyrrolidin-2-one (6h)**

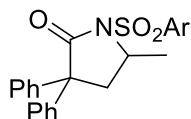

**6h** Ar = 4-MeOC<sub>6</sub>H<sub>4</sub>

White solid, 8 mg, 9% isolated yield. m.p. 176-178 °C, IR (neat, cm<sup>-1</sup>) ν 1731 (C=O). <sup>1</sup>H NMR (360 MHz, CDCl<sub>3</sub>) δ (ppm) 7.88 (d, *J* = 8.9 Hz, 2H, Ar-H), 7.25-7.14 (m, 8H, Ar-H), 7.08-7.05 (m, 2H, Ar-H), 6.89 (d, *J* = 8.9 Hz, 2H, Ar-H), 4.30-4.19 (m, 1H, CH), 3.87 (s, 3H, CH<sub>3</sub>), 3.05 (dd, *J* = 13.2, 6.6 Hz, 1H, CH<sub>2</sub>), 2.42 (dd, *J* = 13.2, 7.3 Hz, 1H, CH<sub>2</sub>), 1.52 (d, *J* = 6.1 Hz, 3H, CH<sub>3</sub>). <sup>13</sup>C NMR (91 MHz, CDCl<sub>3</sub>) δ (ppm) 174.3, 163.9, 142.3, 140.1, 130.8, 128.8, 128.6, 127.9, 127.6, 127.5, 127.3, 114.0, 58.0, 55.8, 53.8, 42.4, 22.2. HRMS (ESI) *m/z* calcd for C<sub>24</sub>H<sub>24</sub>NO<sub>3</sub>S [M+H]<sup>+</sup> 422.1421, found 422.1406.

**4-methoxy-*N*-(5-methyl-3,3-diphenyldihydrofuran-2(3*H*)-ylidene)benzenesulfonamide (7h)**

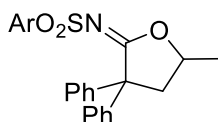

**7h** Ar = 4-MeOC<sub>6</sub>H<sub>4</sub>

White solid, 74 mg, 88% isolated yield. m.p. 138-140 °C, IR (neat, cm<sup>-1</sup>) ν 1630 (C=N). <sup>1</sup>H NMR (360 MHz, CDCl<sub>3</sub>) δ (ppm) 7.83 (d, *J* = 8.8 Hz, 2H, Ar-H), 7.30-7.12 (m, 10H, Ar-H), 6.88 (d, *J* = 8.8 Hz, 2H, Ar-H), 4.67-4.58 (m, 1H, CH), 3.80 (s, 3H, CH<sub>3</sub>), 2.88 (dd, *J* = 13.0, 4.6 Hz, 1H, CH<sub>2</sub>), 2.45 (dd, *J* = 13.0, 10.7 Hz, 1H, CH<sub>2</sub>), 1.42 (d, *J* = 6.2 Hz, 3H, CH<sub>3</sub>). <sup>13</sup>C NMR (91 MHz, CDCl<sub>3</sub>) δ (ppm) 175.3, 162.9, 141.6, 140.0, 133.3, 129.6, 128.9, 128.2, 127.9, 127.5, 127.4, 114.2, 113.6, 80.8, 61.3, 55.7, 45.6, 19.9. HRMS (ESI) *m/z* calcd for C<sub>24</sub>H<sub>24</sub>NO<sub>3</sub>S [M+H]<sup>+</sup> 422.1421, found 422.1404.

#### 4-Crystallographic Data

X-ray diffraction data for compounds **4m**, **6a**, **7a** & **7c** were collected by using a Kappa X8 APPEX II Bruker diffractometer with graphite-monochromated MoK $\alpha$  radiation ( $\lambda = 0.71073$  Å). Crystals were mounted on a CryoLoop (Hampton Research) with Paratone-N (Hampton Research) as cryoprotectant and then flashfrozen in a nitrogen-gas stream at 200 K. For compounds, the temperature of the crystal was maintained at the selected value by means of a 700 series Cryostream cooling device to within an accuracy of  $\pm 1$  K. The data were corrected for Lorentz polarization, and absorption effects. The structures were solved by direct methods using SHELXS-97<sup>[17]</sup> and refined against  $F^2$  by full-matrix least-squares techniques using SHELXL-2018<sup>[18]</sup> with anisotropic displacement parameters for all non-hydrogen atoms. Hydrogen atoms were located on a difference Fourier map and introduced into the calculations as a riding model with isotropic thermal parameters. All calculations were performed by using the Crystal Structure crystallographic software package WINGX<sup>[19]</sup>.

The crystal data collection and refinement parameters are given in Table S2.

CCDC 2213993-2213996 contains the supplementary crystallographic data for this paper. These data can be obtained free of charge from the Cambridge Crystallographic Data Centre and Fachinformationszentrum Karlsruhe via <http://www.ccdc.cam.ac.uk/structures/>.

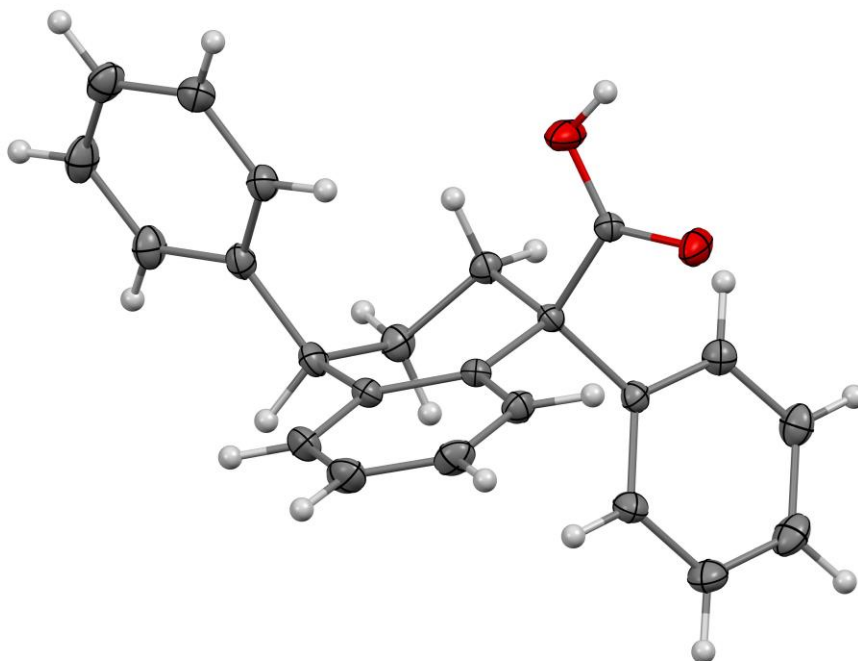

**Figure S1.** An ORTEP drawing of compound **4m**. Thermal ellipsoids are shown at the 30% level.

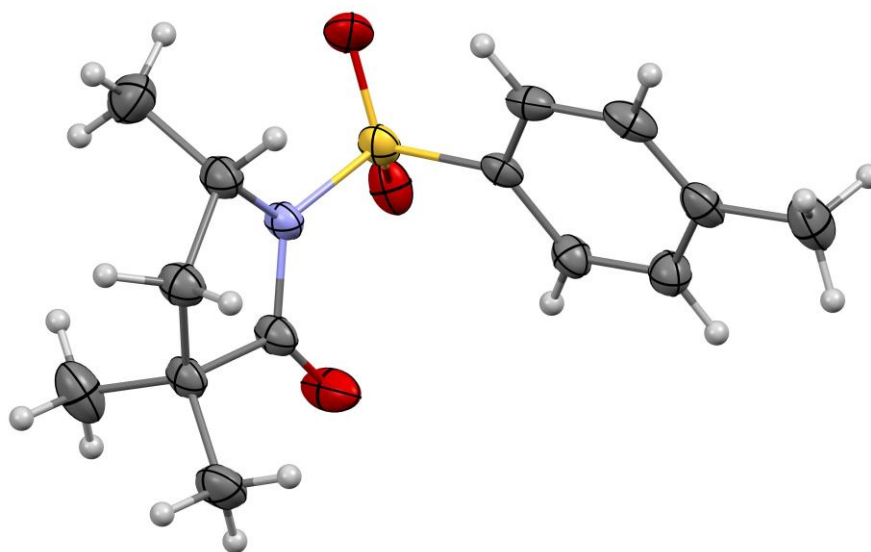

**Figure S2.** An ORTEP drawing of compound **6a**. Thermal ellipsoids are shown at the 30% level.

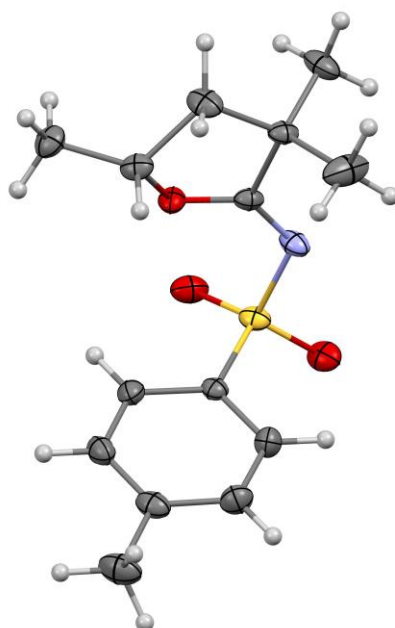

**Figure S3.** An ORTEP drawing of compound **7a**. Thermal ellipsoids are shown at the 30% level. Only one disorder component is shown.

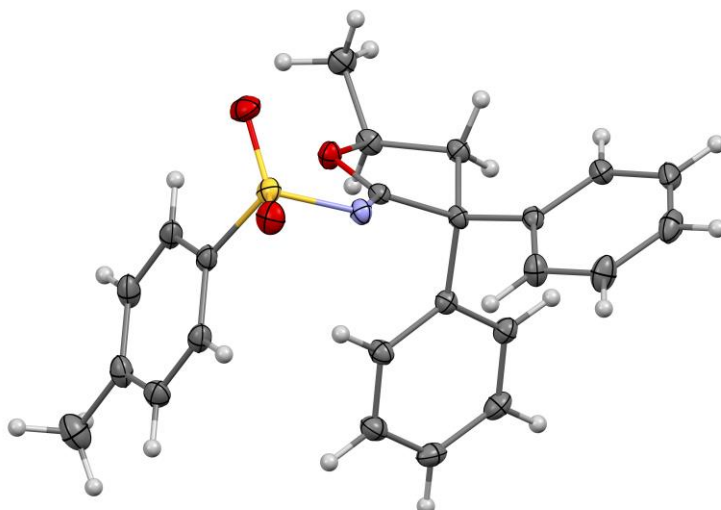

**Figure S4.** An ORTEP drawing of compound **7c**. Thermal ellipsoids are shown at the 30% level.

| Compound                                                       | 4m                                             | 6a                                                 | 7a                                                 | 7c                                                 |
|----------------------------------------------------------------|------------------------------------------------|----------------------------------------------------|----------------------------------------------------|----------------------------------------------------|
| CCDC                                                           | 2213993                                        | 2213994                                            | 2213996                                            | 2213995                                            |
| Empirical Formula                                              | C <sub>23</sub> H <sub>20</sub> O <sub>2</sub> | C <sub>14</sub> H <sub>19</sub> N O <sub>3</sub> S | C <sub>14</sub> H <sub>19</sub> N O <sub>3</sub> S | C <sub>24</sub> H <sub>23</sub> N O <sub>3</sub> S |
| <i>M<sub>r</sub></i>                                           | 328.39                                         | 281.36                                             | 281.36                                             | 405.49                                             |
| Crystal size, mm <sup>3</sup>                                  | 0.14 x 0.07 x 0.02                             | 0.28 x 0.09 x 0.03                                 | 0.28 x 0.18 x 0.13                                 | 0.33 x 0.12 x 0.03                                 |
| Crystal system                                                 | triclinic                                      | monoclinic                                         | triclinic                                          | orthorhombic                                       |
| Space group                                                    | <i>P</i> -1                                    | <i>P</i> 2 <sub>1</sub> / <i>c</i>                 | <i>P</i> -1                                        | <i>P b c a</i>                                     |
| <i>a</i> , Å                                                   | 8.611(2)                                       | 8.0427(9)                                          | 8.0664(4)                                          | 10.3347(3)                                         |
| <i>b</i> , Å                                                   | 9.741(2)                                       | 15.333(2)                                          | 8.1885(4)                                          | 19.6916(6)                                         |
| <i>c</i> , Å                                                   | 11.193(3)                                      | 11.9935(15)                                        | 12.3567(7)                                         | 20.1928(7)                                         |
| $\alpha$ , °                                                   | 95.479(10)                                     | 90                                                 | 89.870(3)                                          | 90                                                 |
| $\beta$ , °                                                    | 96.784(10)                                     | 99.561(7)                                          | 88.621(3)                                          | 90                                                 |
| $\gamma$ , °                                                   | 105.599(10)                                    | 90                                                 | 64.810(2)                                          | 90                                                 |
| Cell volume, Å <sup>3</sup>                                    | 889.9(4)                                       | 1458.4(3)                                          | 738.32(7)                                          | 4109.4(2)                                          |
| <i>Z</i> ; <i>Z'</i>                                           | 2 ; 1                                          | 4 ; 1                                              | 2 ; 1                                              | 8 ; 1                                              |
| <i>T</i> , K                                                   | 200(1)                                         | 200(1)                                             | 200(1)                                             | 200(1)                                             |
| Radiation type ; wavelength Å                                  | MoK $\alpha$ ; 0.71073                         | MoK $\alpha$ ; 0.71073                             | MoK $\alpha$ ; 0.71073                             | MoK $\alpha$ ; 0.71073                             |
| <i>F</i> <sub>000</sub>                                        | 348                                            | 600                                                | 300                                                | 1712                                               |
| $\mu$ , mm <sup>-1</sup>                                       | 0.077                                          | 0.225                                              | 0.223                                              | 0.183                                              |
| range, °                                                       | 1.849 - 30.495                                 | 2.175 - 30.498                                     | 1.649 - 30.723                                     | 1.621 - 30.712                                     |
| Reflection collected                                           | 24 263                                         | 24 815                                             | 27 372                                             | 104 894                                            |
| Reflections unique                                             | 5 197                                          | 4 348                                              | 4 487                                              | 6 265                                              |
| <i>R</i> <sub>int</sub>                                        | 0.0585                                         | 0.0581                                             | 0.0376                                             | 0.0837                                             |
| GOF                                                            | 1.036                                          | 1.075                                              | 1.023                                              | 1.013                                              |
| Refl. obs. ( <i>I</i> > 2( <i>I</i> ))                         | 3 085                                          | 2 326                                              | 3 599                                              | 3 978                                              |
| Parameters ; restraints                                        | 227 ; 0                                        | 176 ; 0                                            | 205 ; 0                                            | 264 ; 0                                            |
| w <i>R</i> <sub>2</sub> (all data)                             | 0.1346                                         | 0.2557                                             | 0.1463                                             | 0.1163                                             |
| <i>R</i> value ( <i>I</i> > 2( <i>I</i> ))                     | 0.0540                                         | 0.0823                                             | 0.0525                                             | 0.0452                                             |
| Largest diff. peak and hole (e <sup>-</sup> ·Å <sup>-3</sup> ) | 0.232 ; -0.260                                 | 0.872 ; -0.471                                     | 0.439 ; -0.433                                     | 0.261 ; -0.439                                     |

**Table S2.** Crystallographic data and structure refinement details.

## 5-Spectra

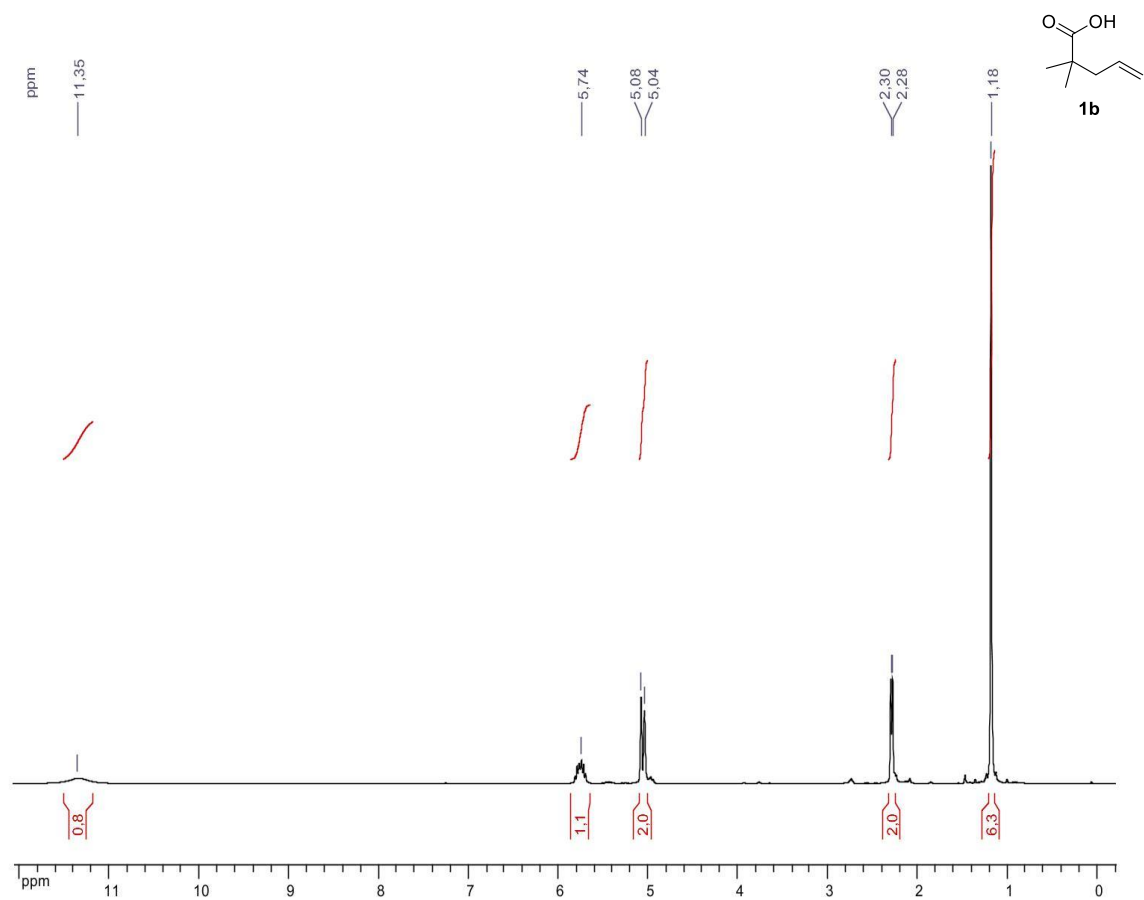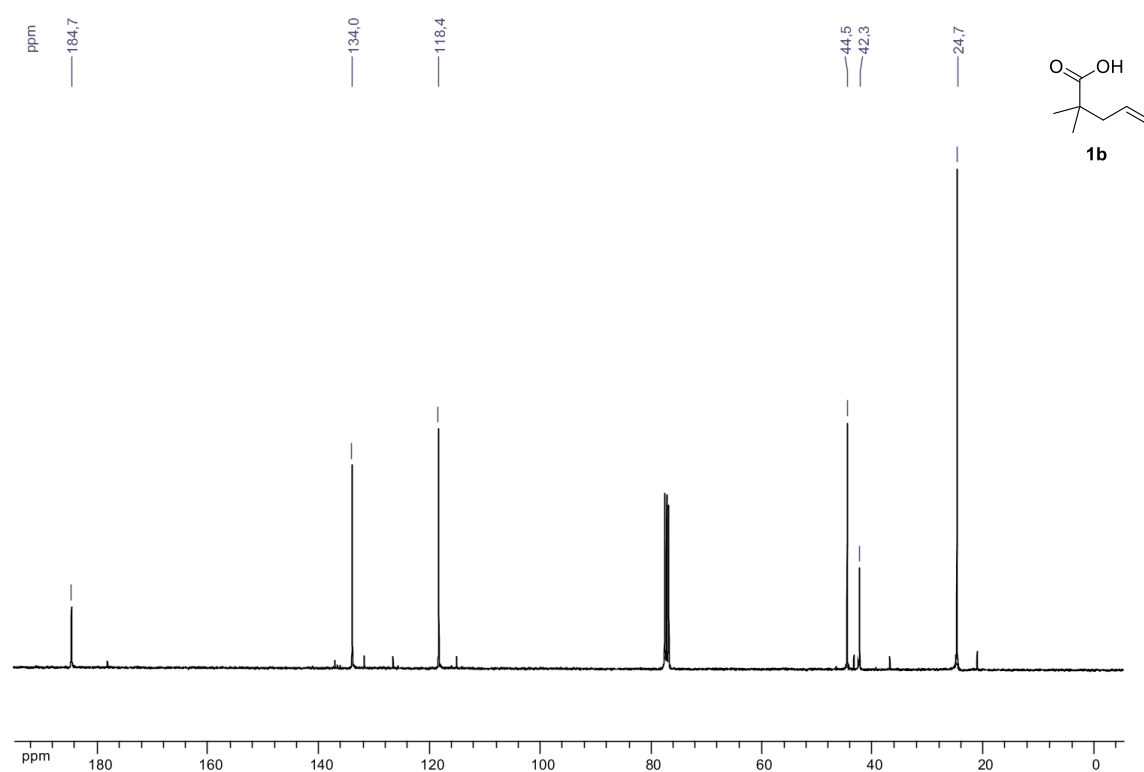

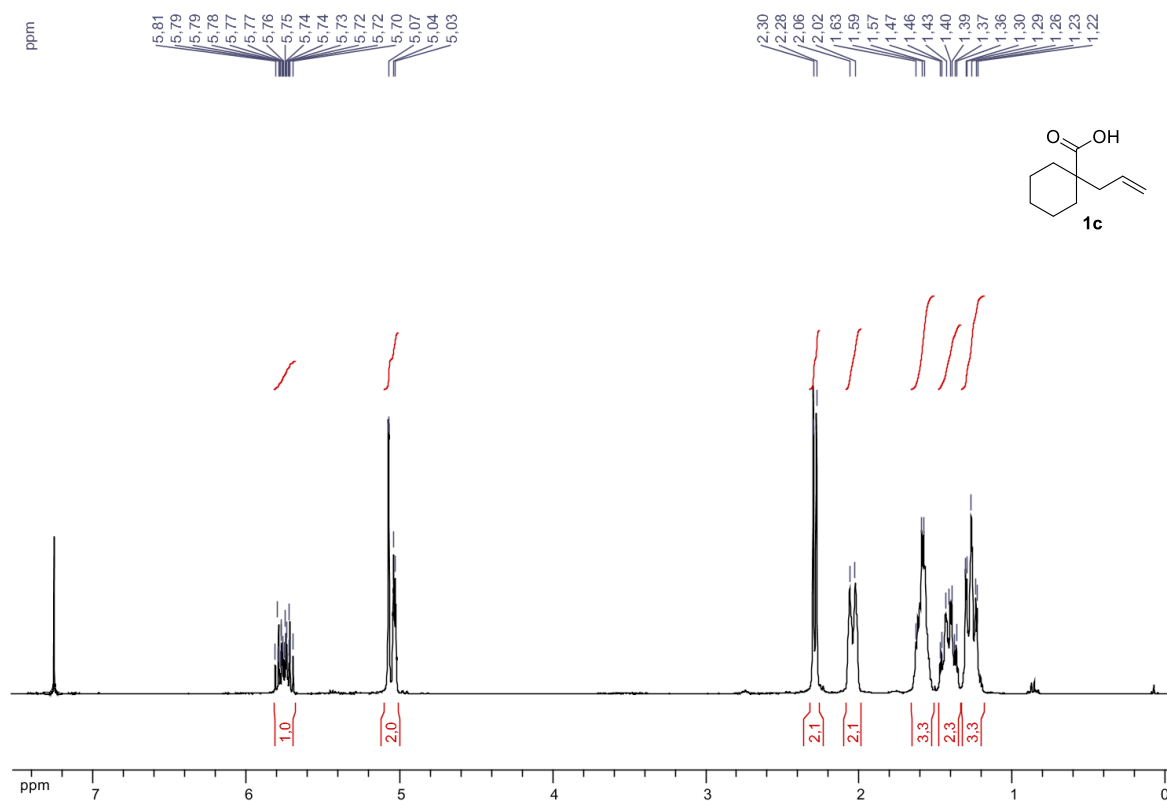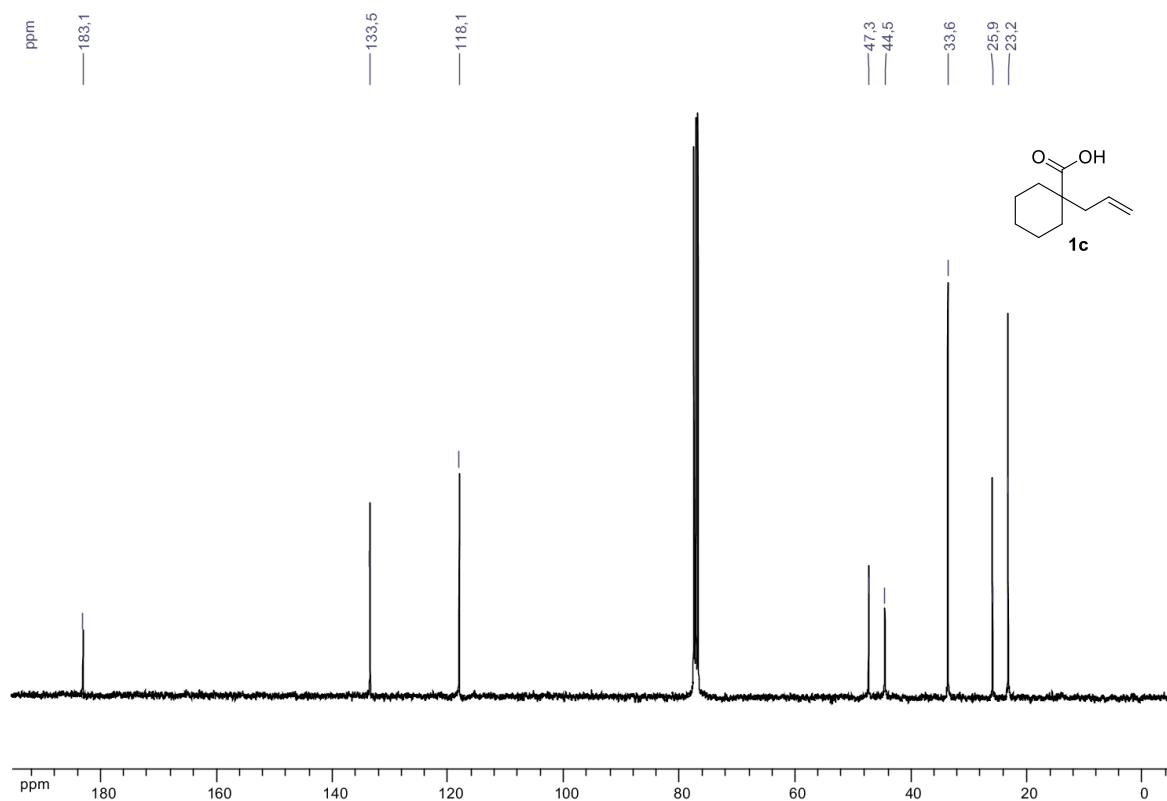

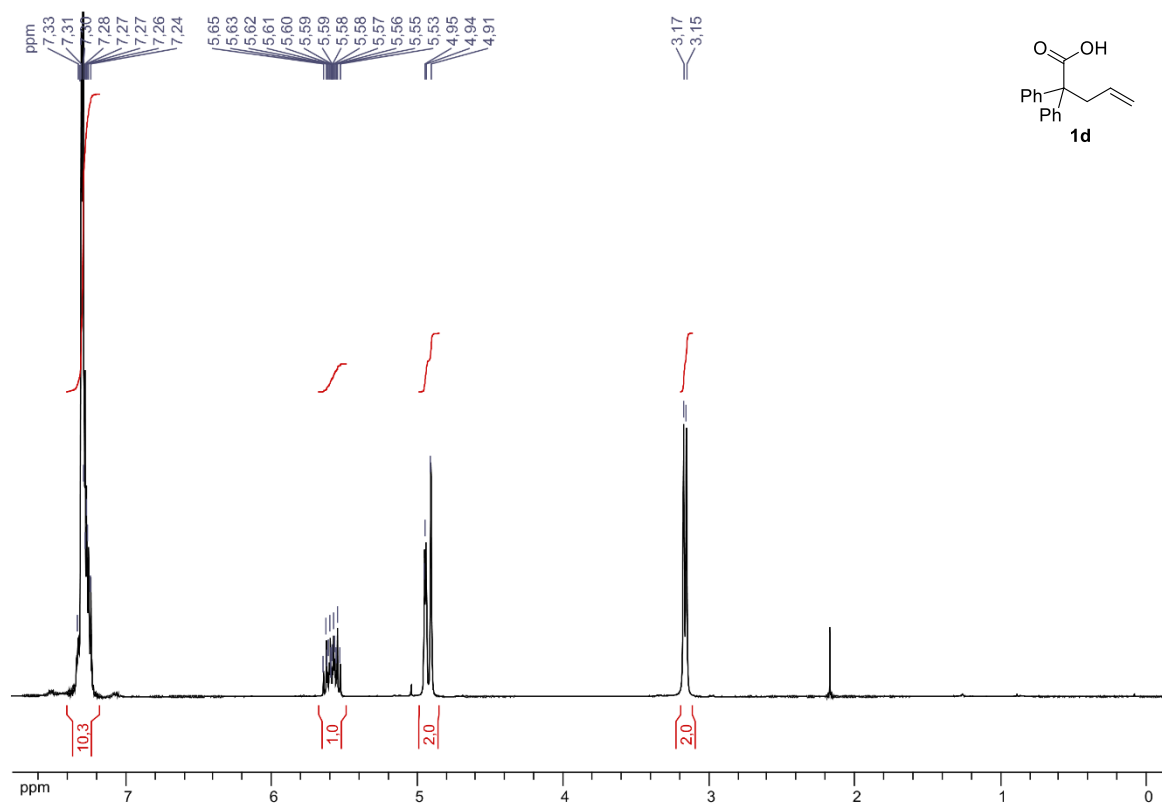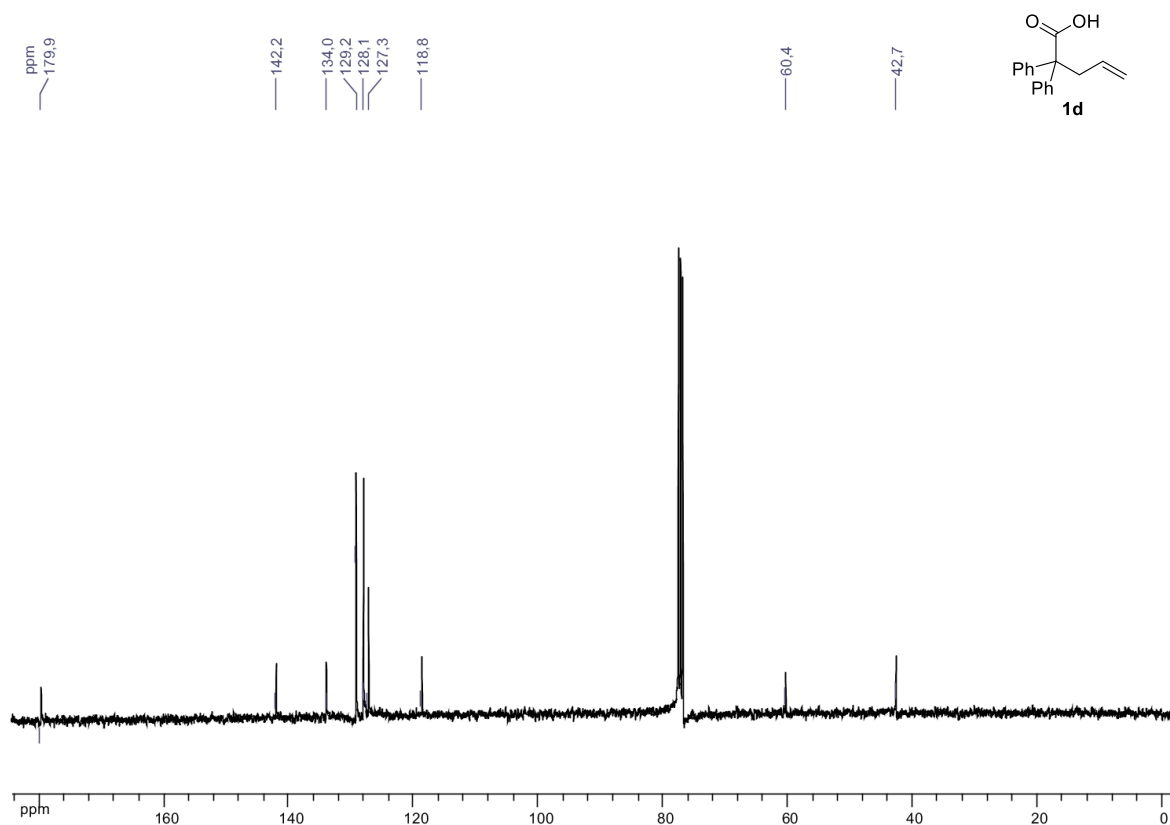



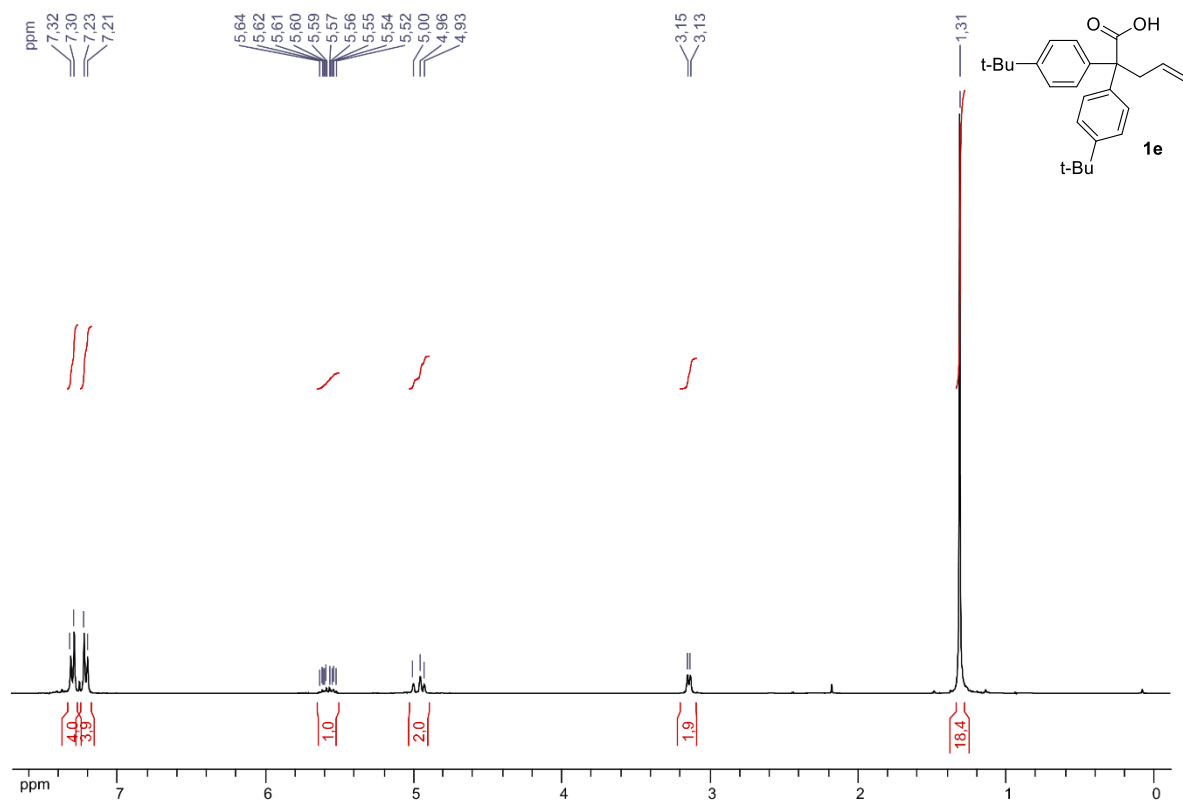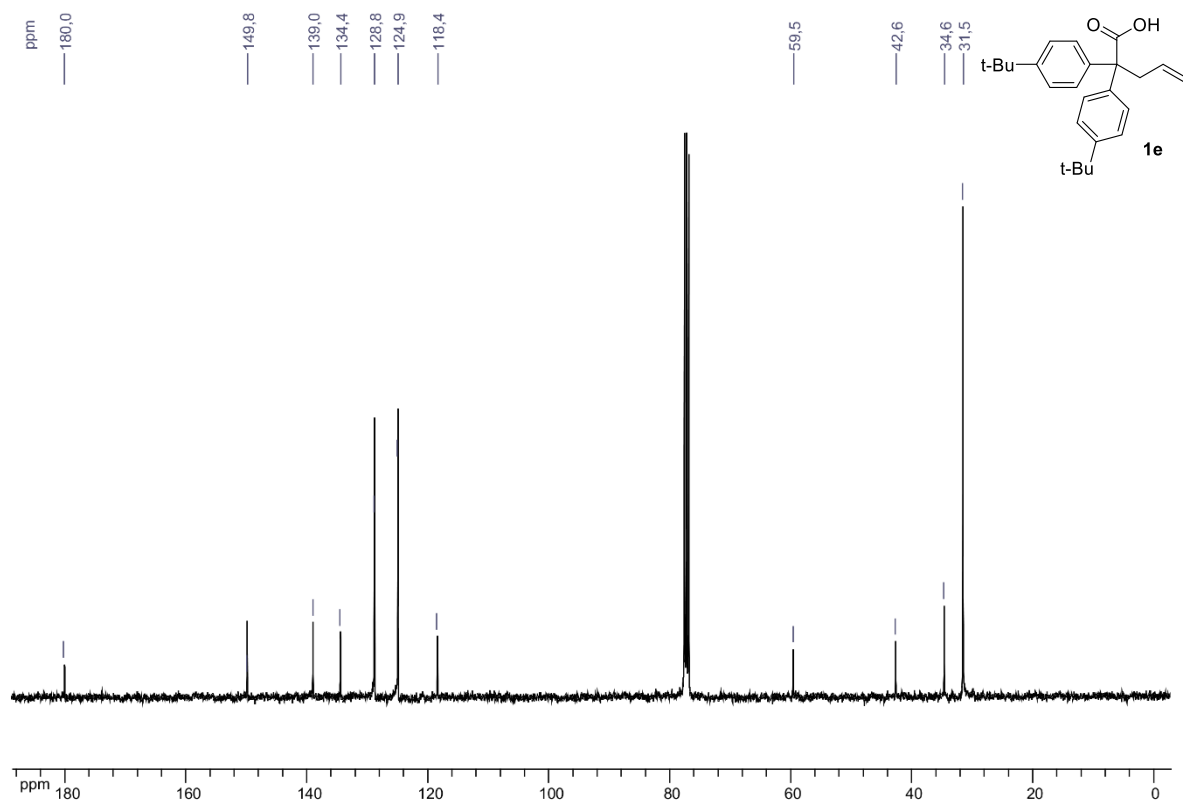

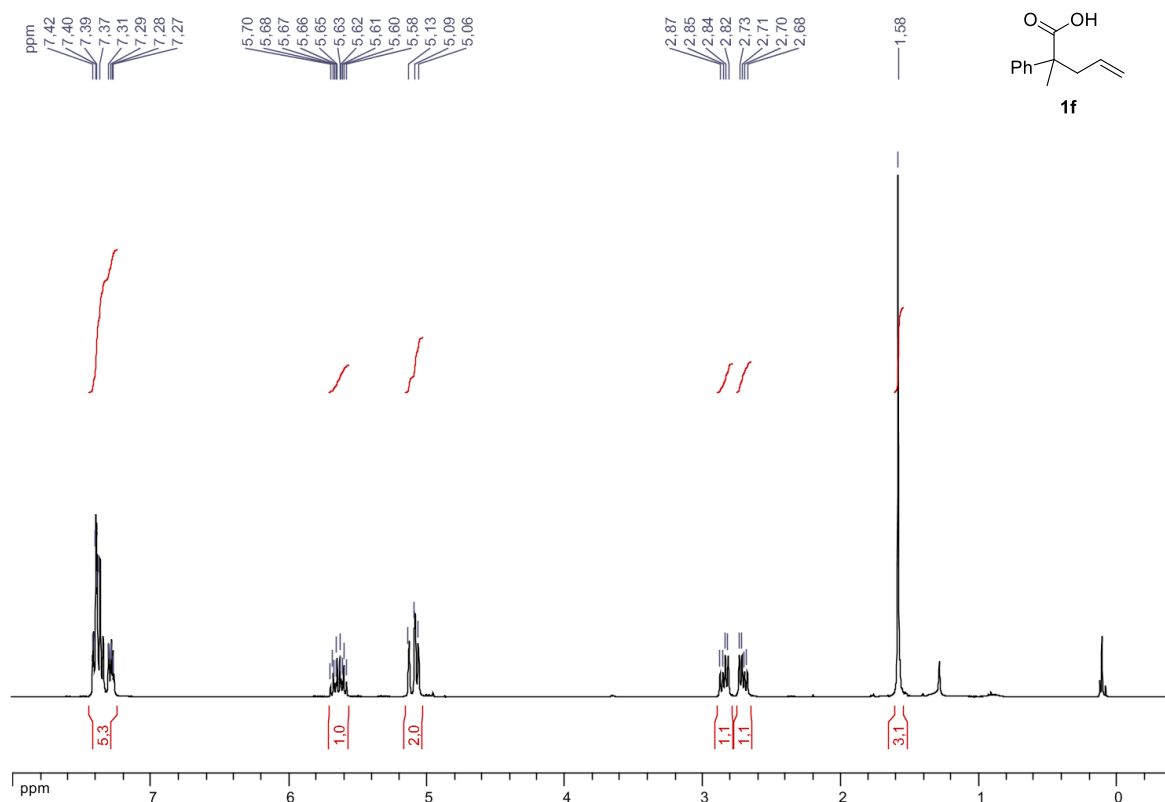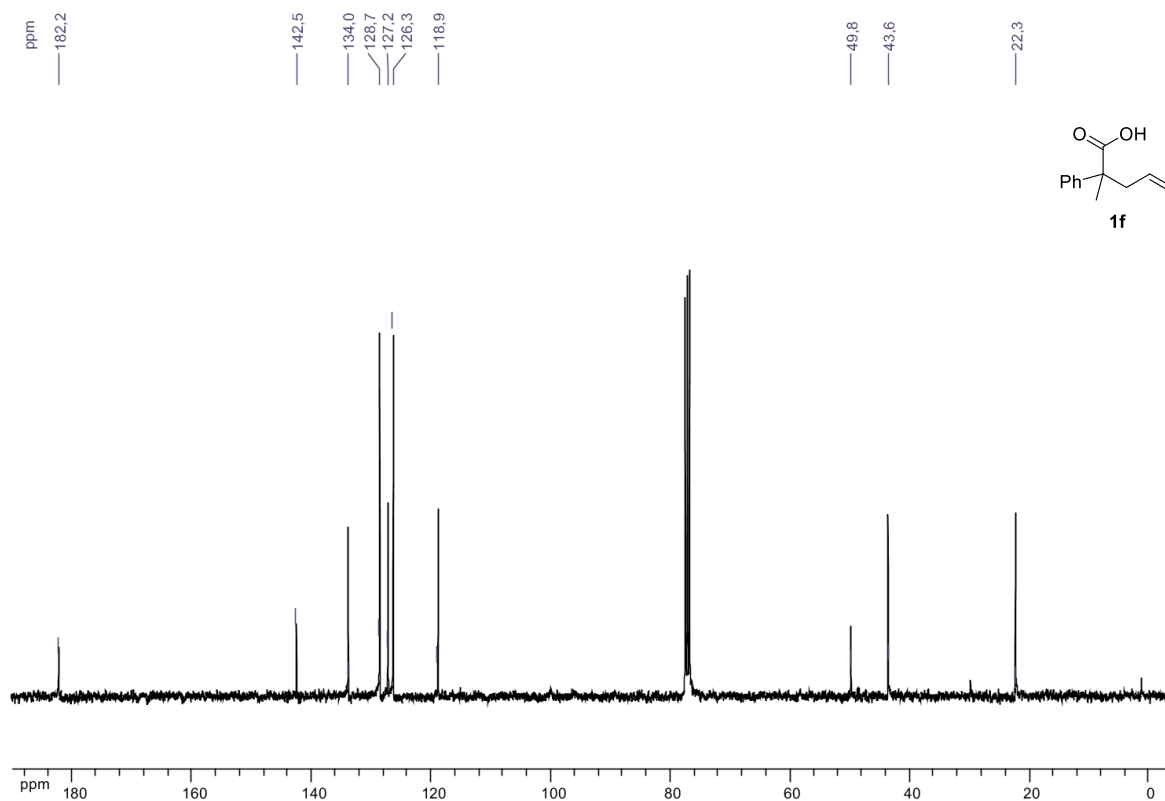

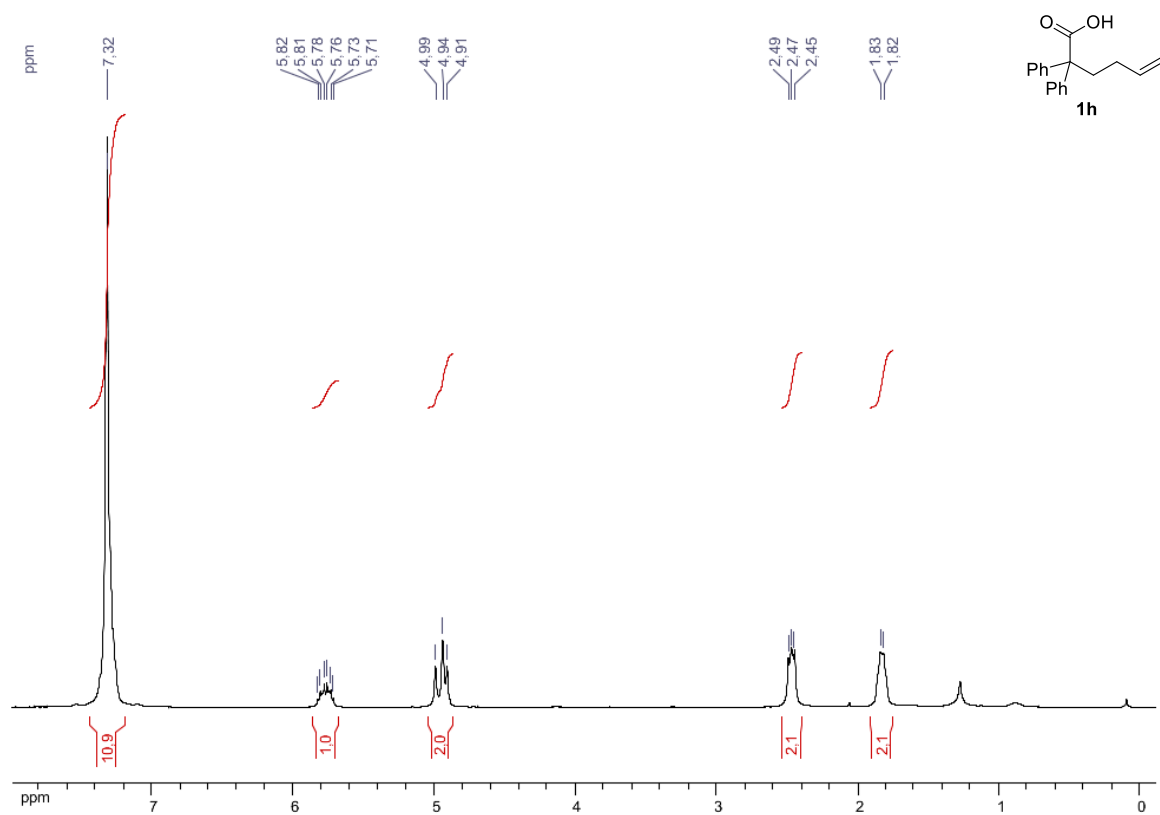

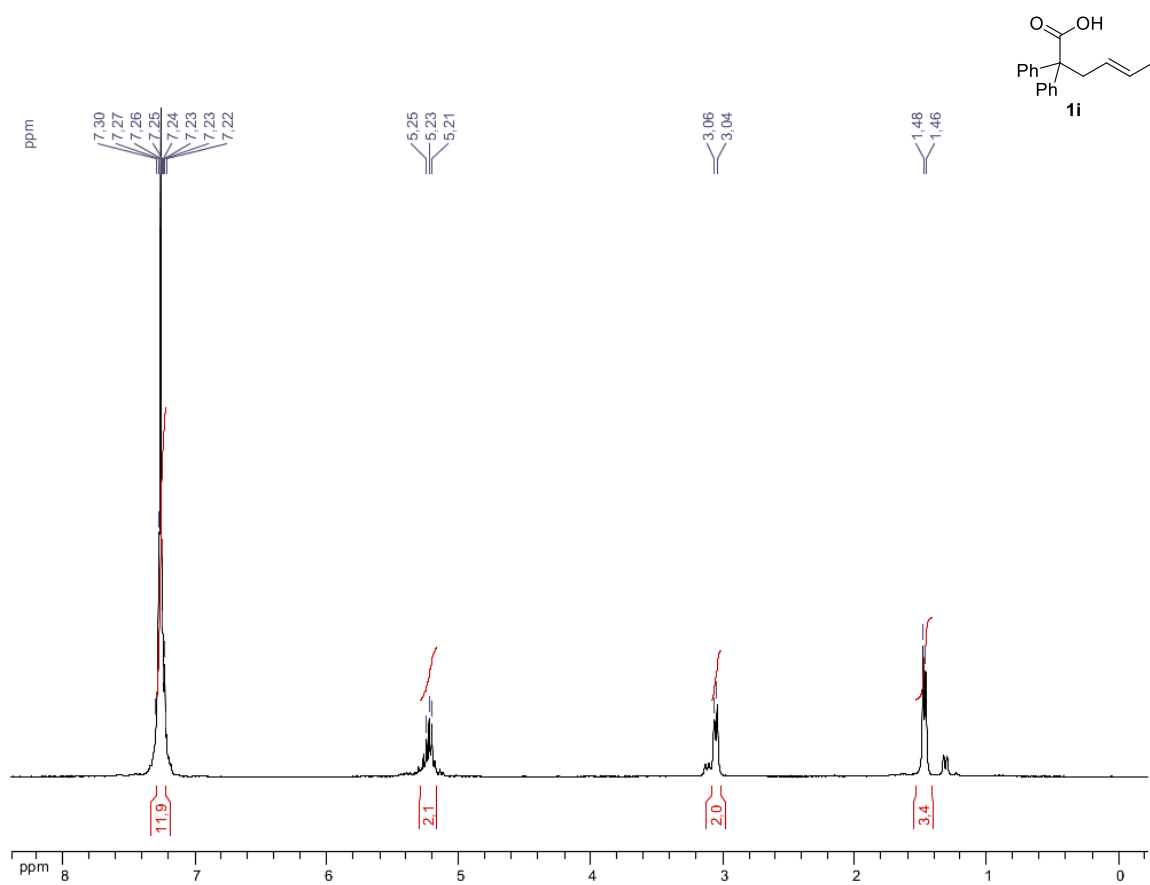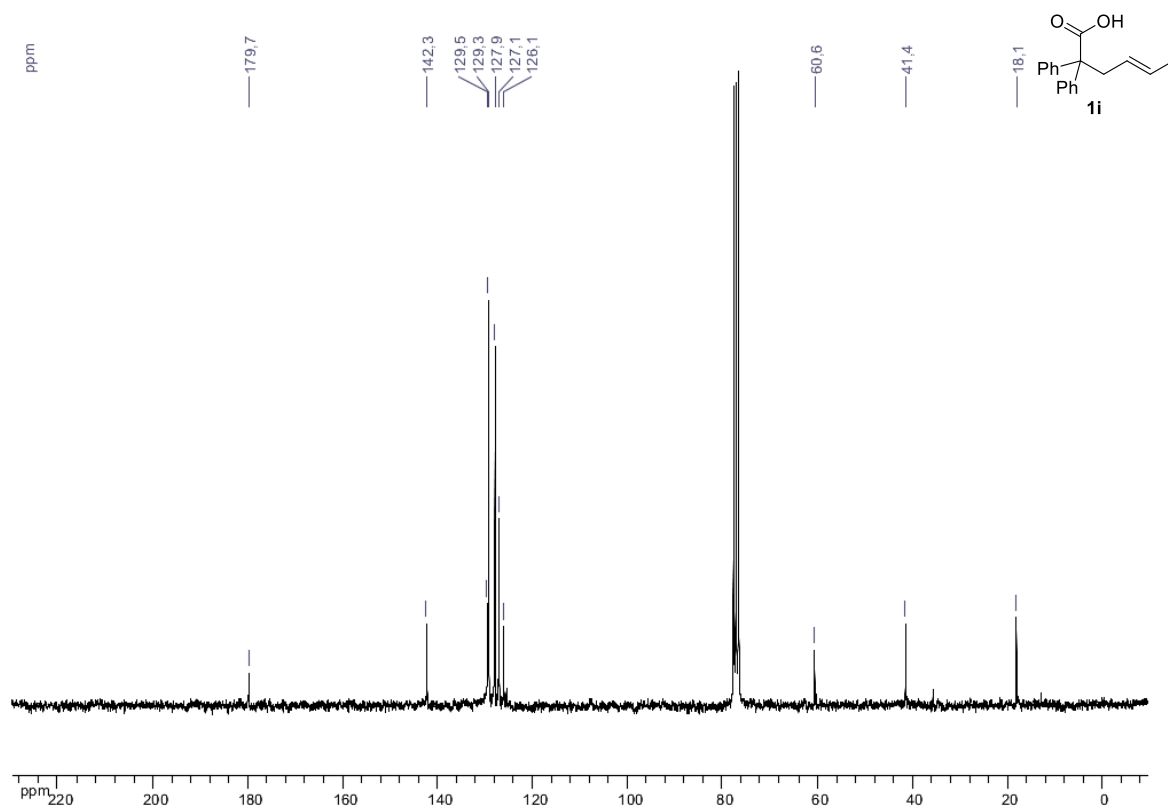

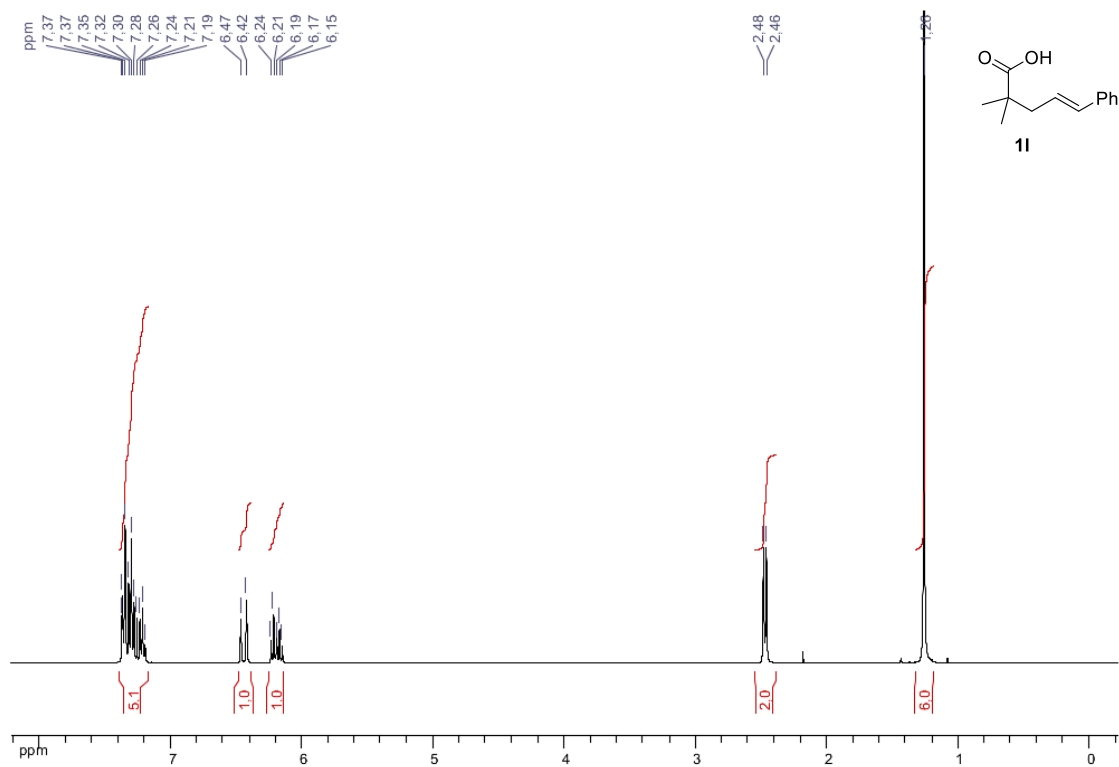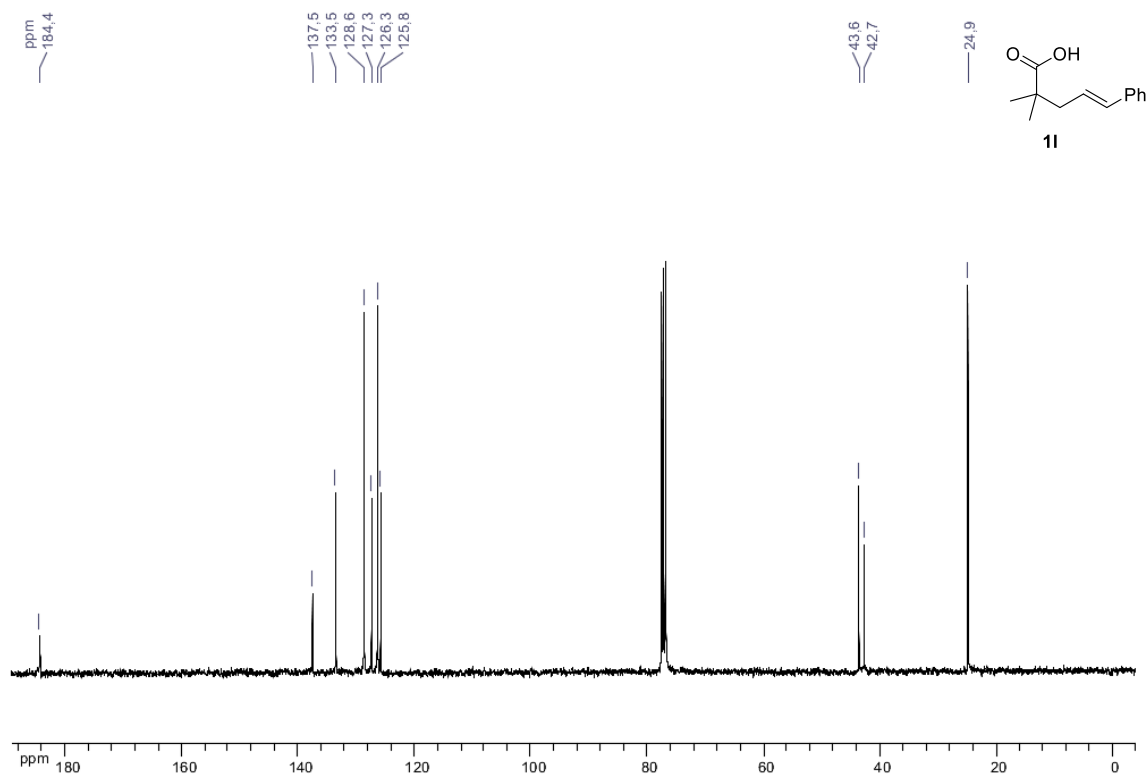

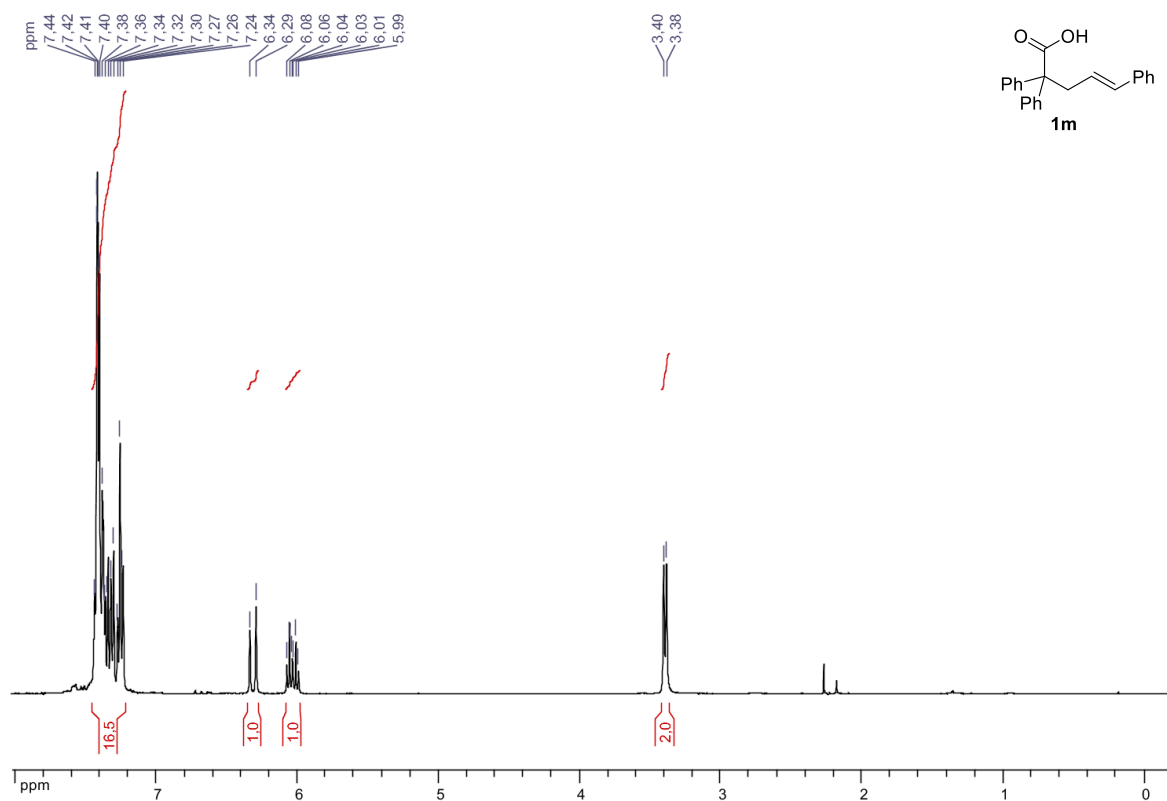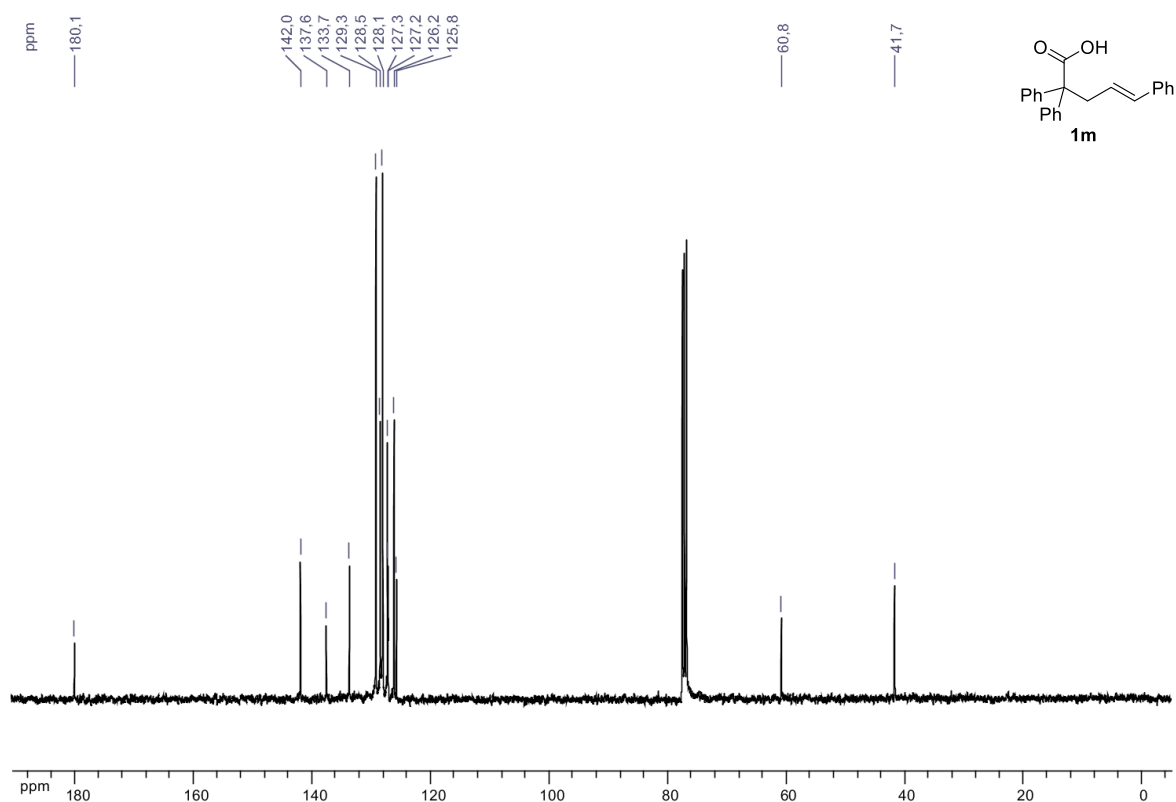

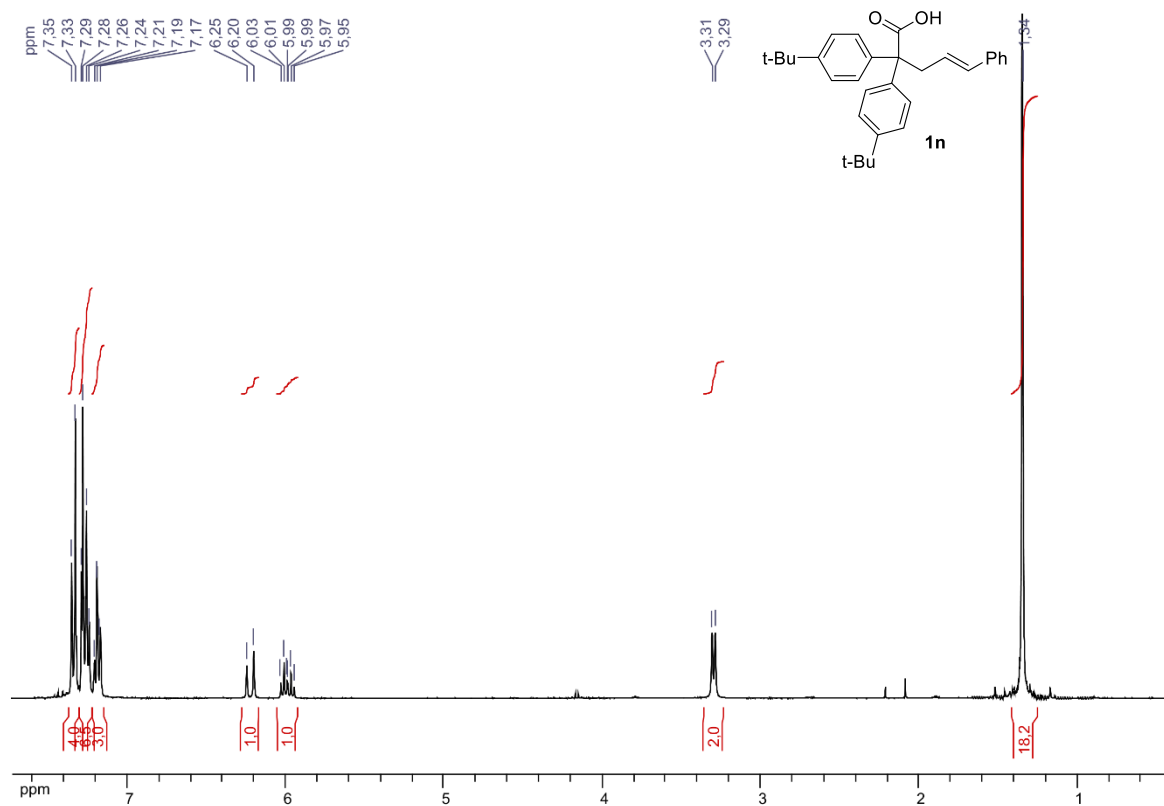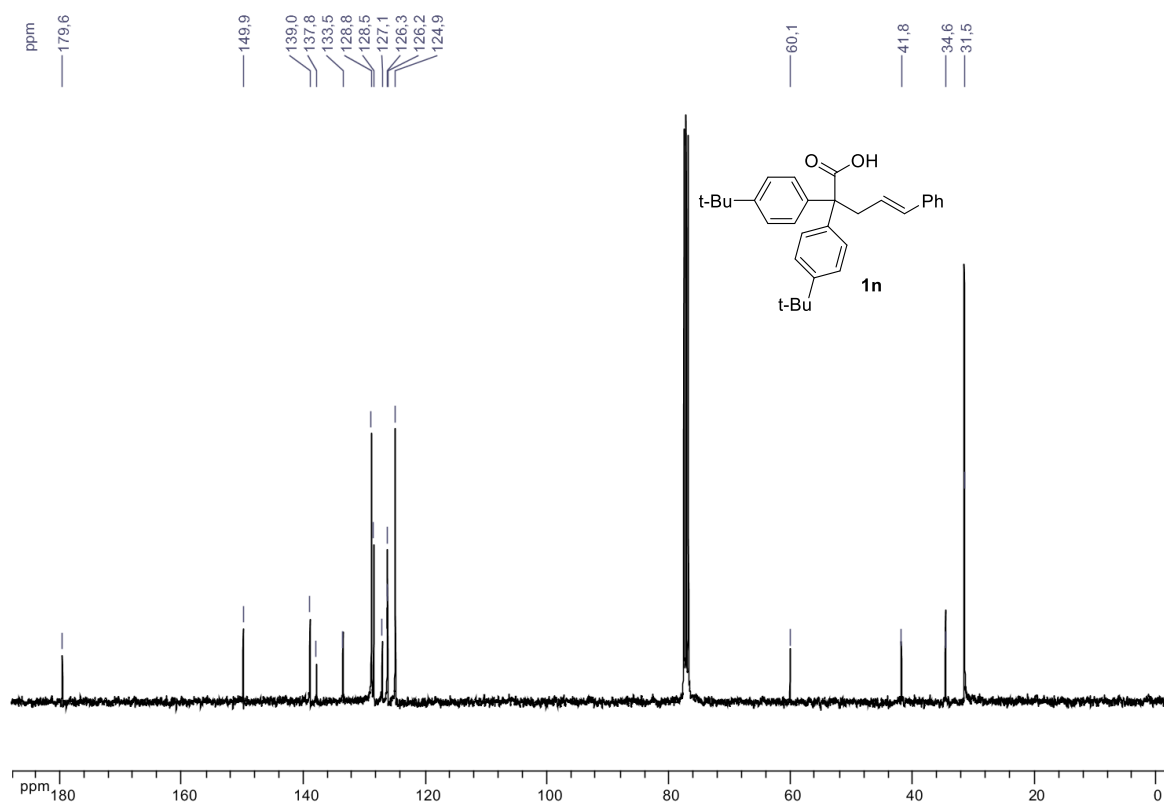

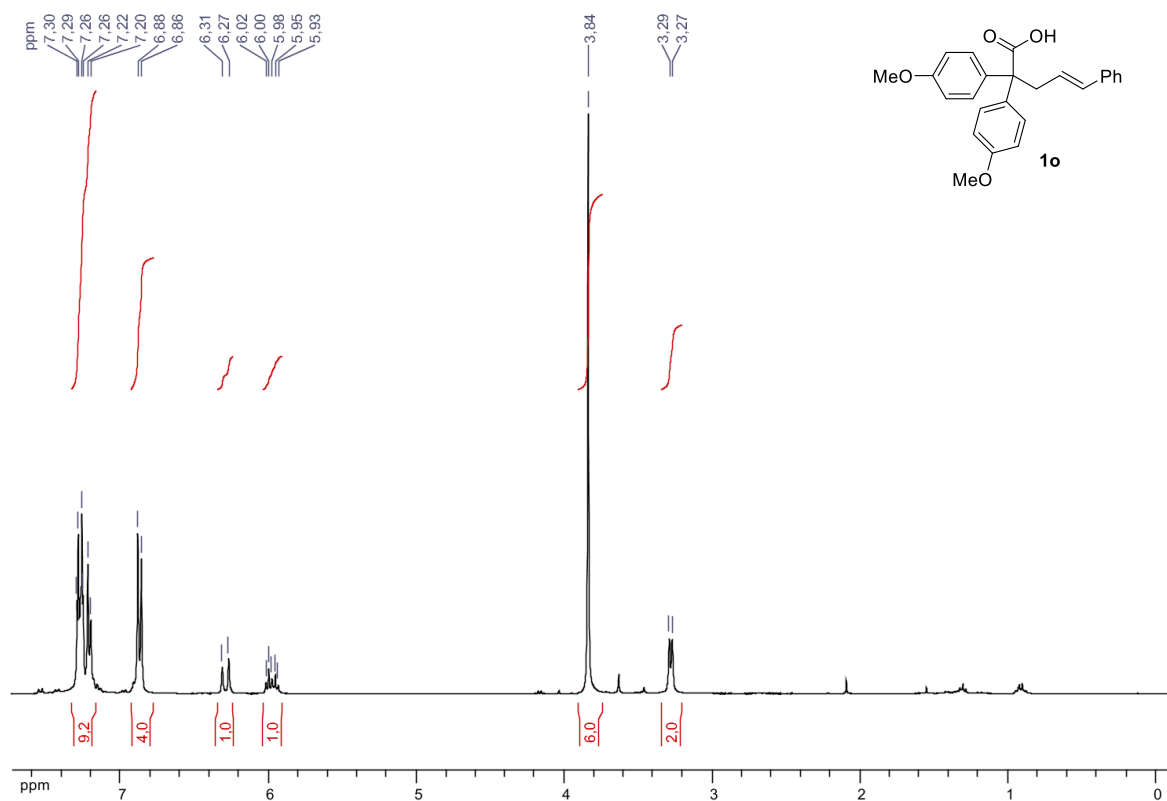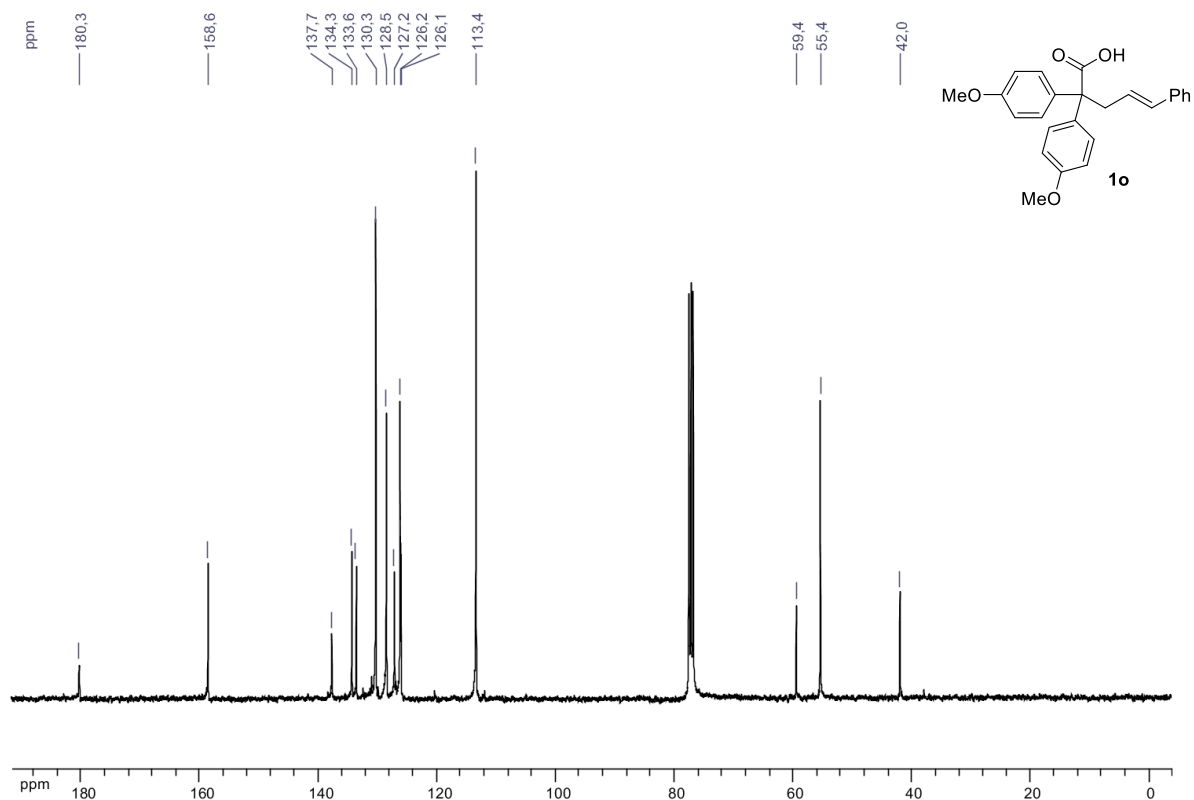



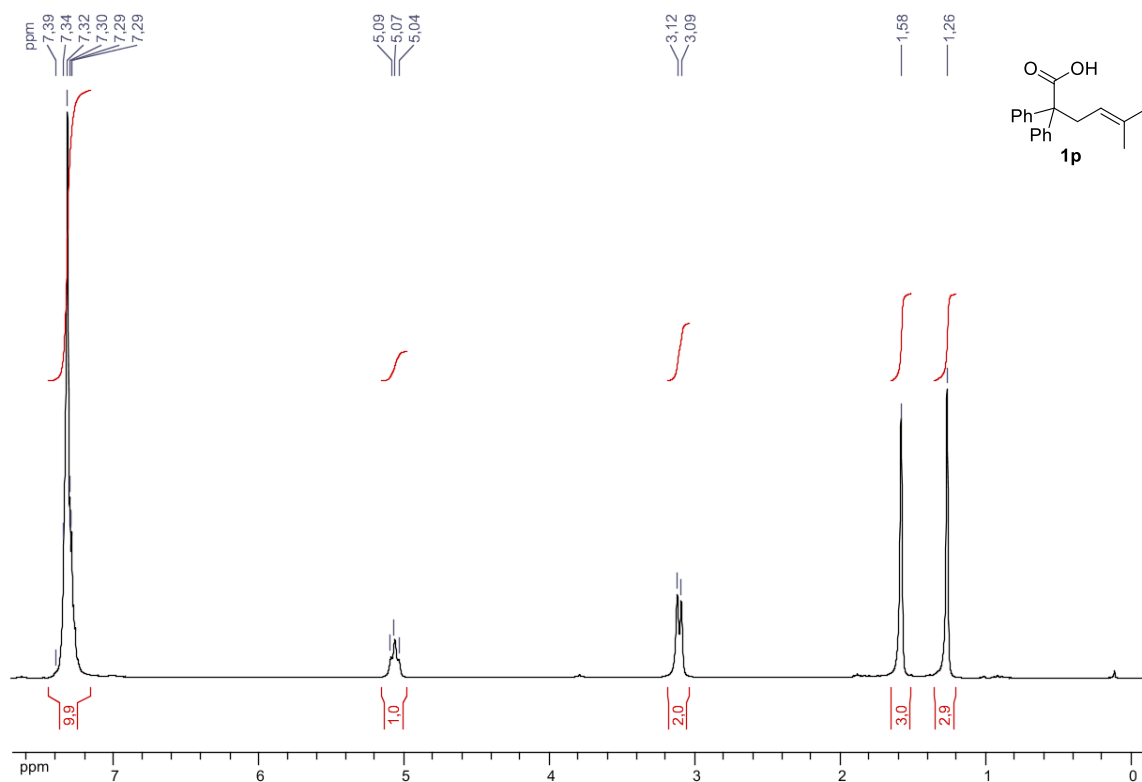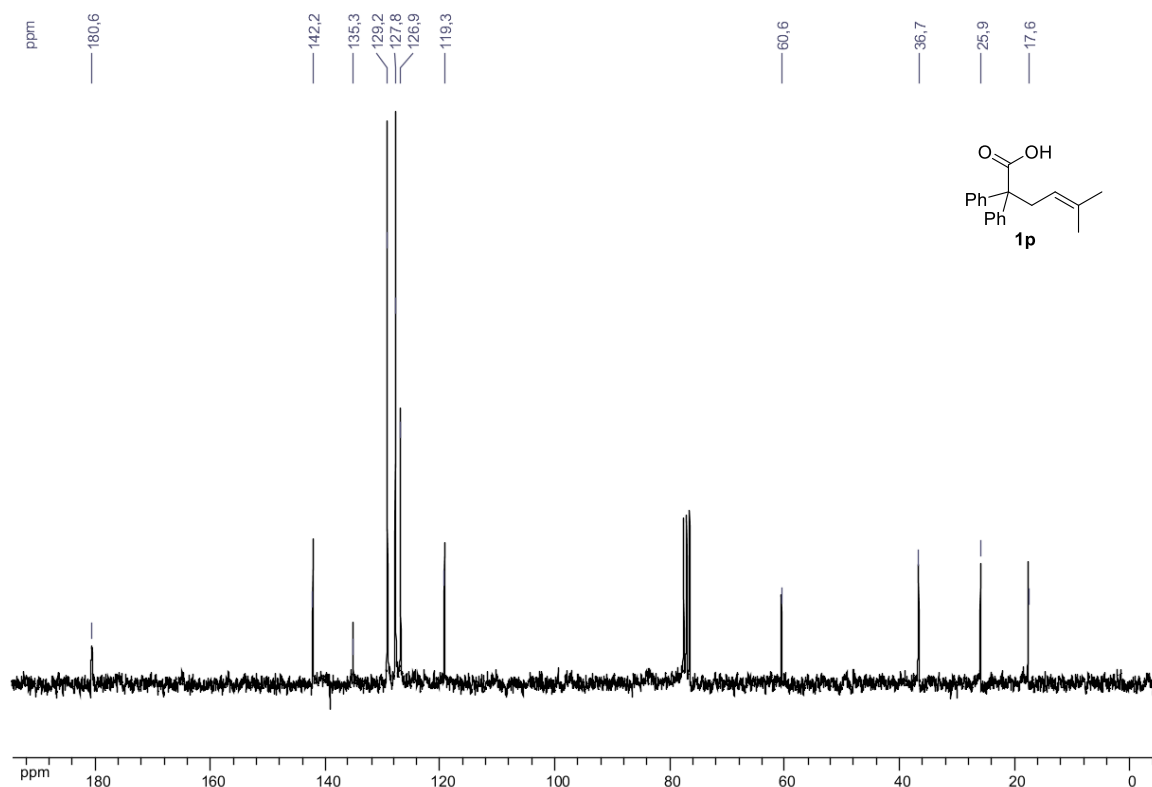

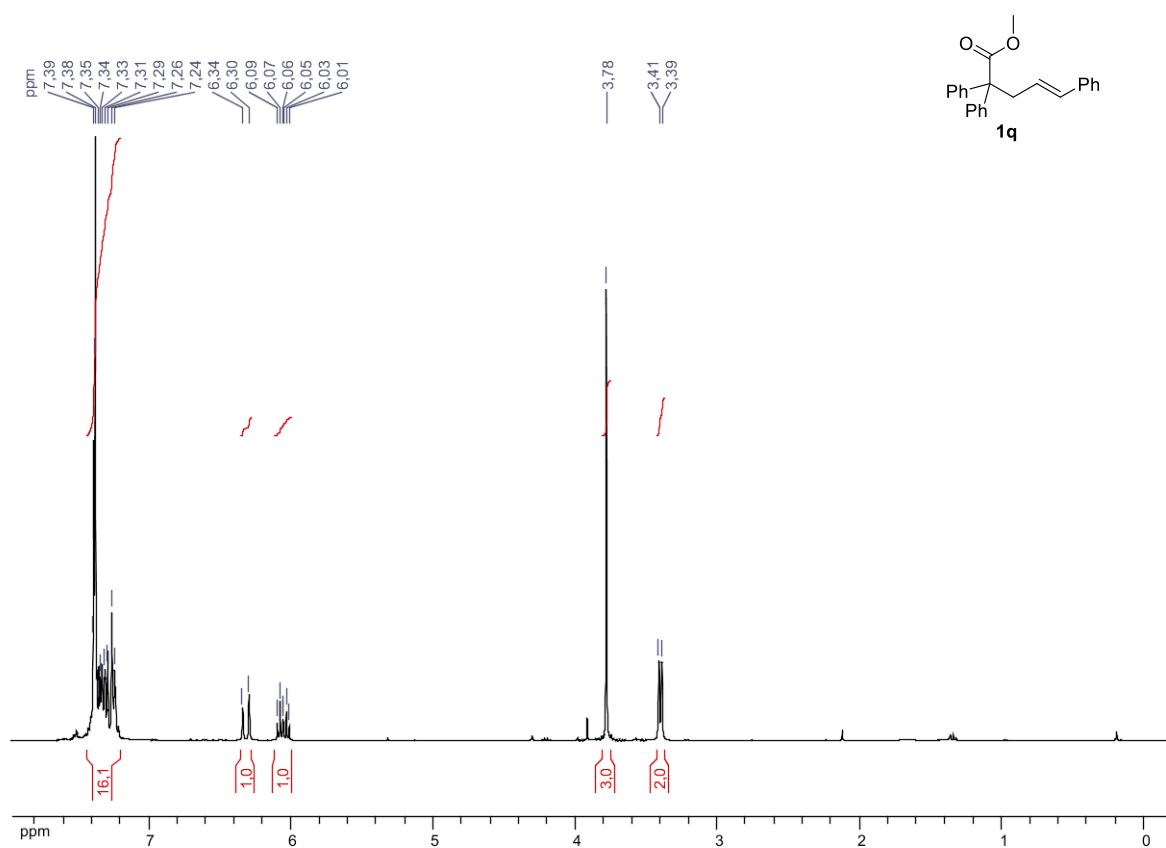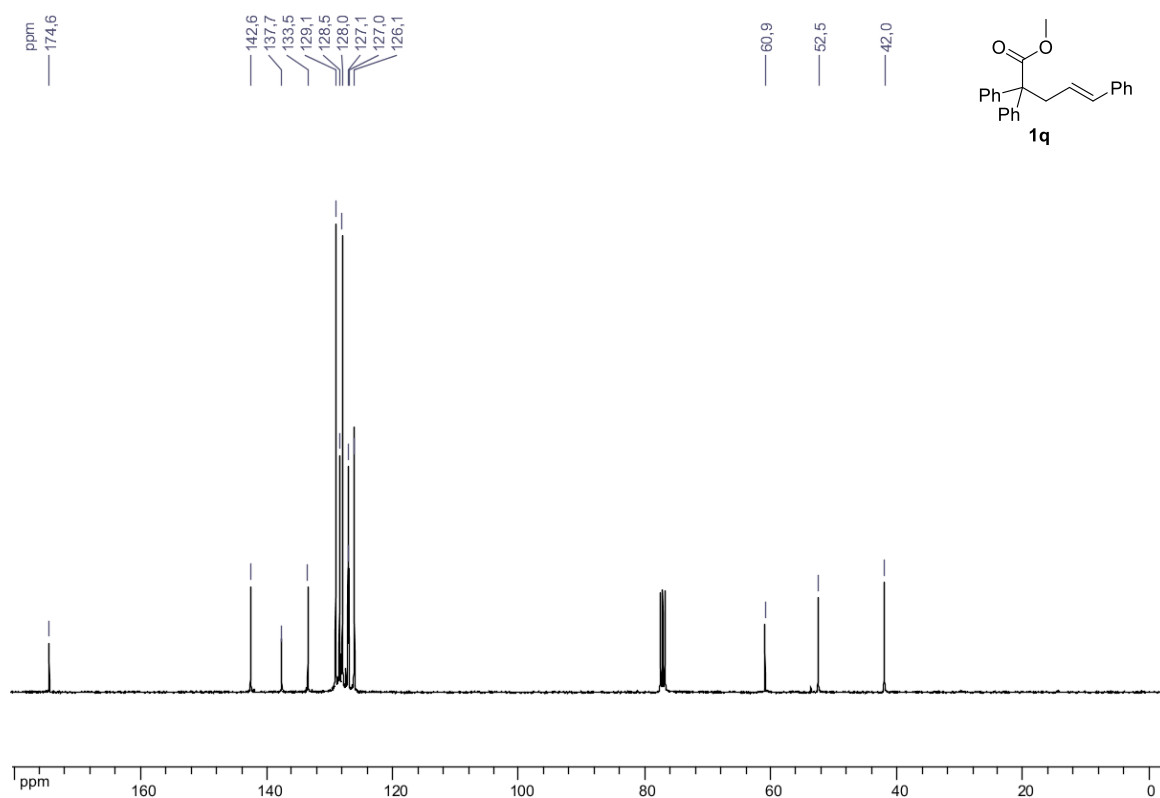

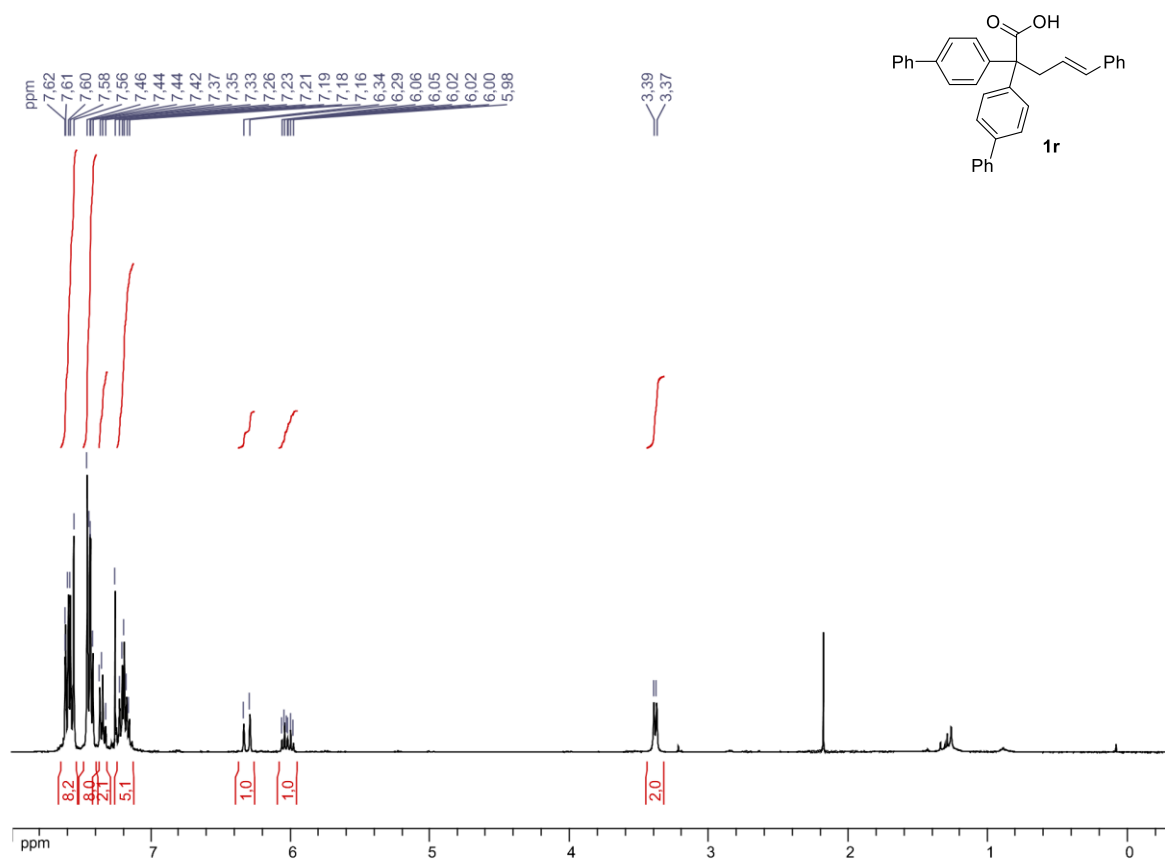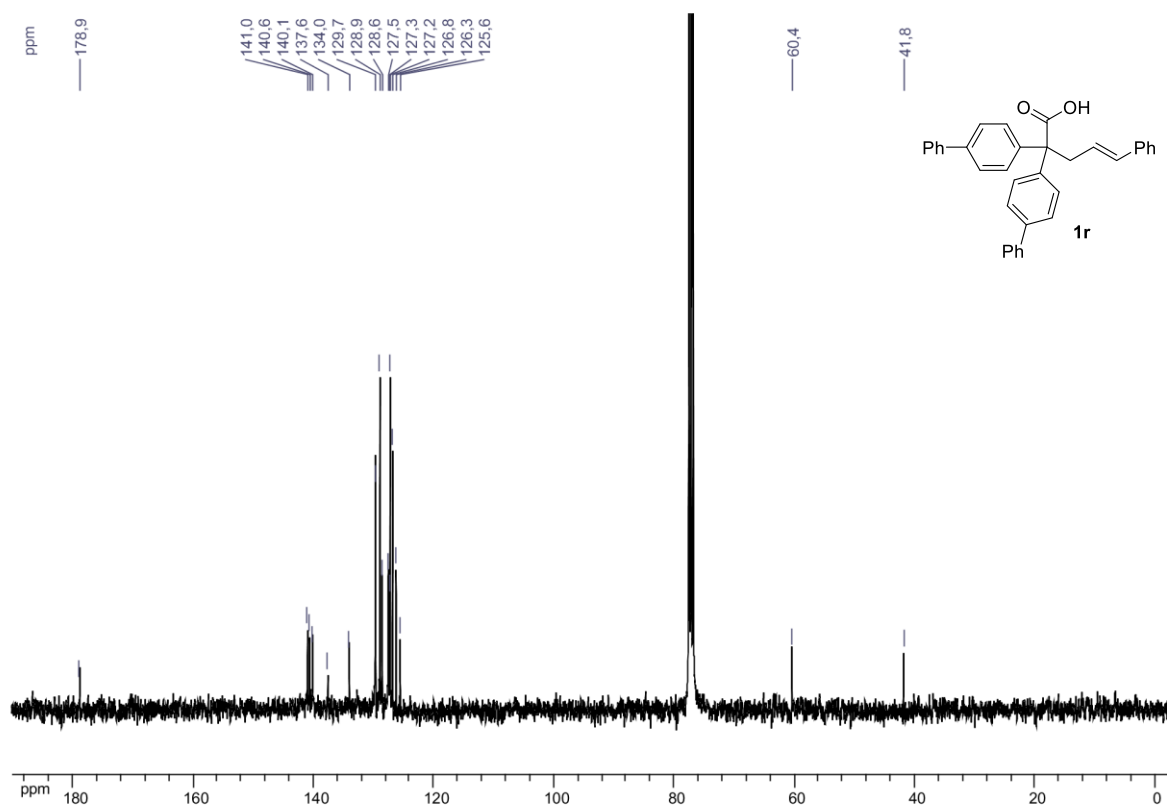

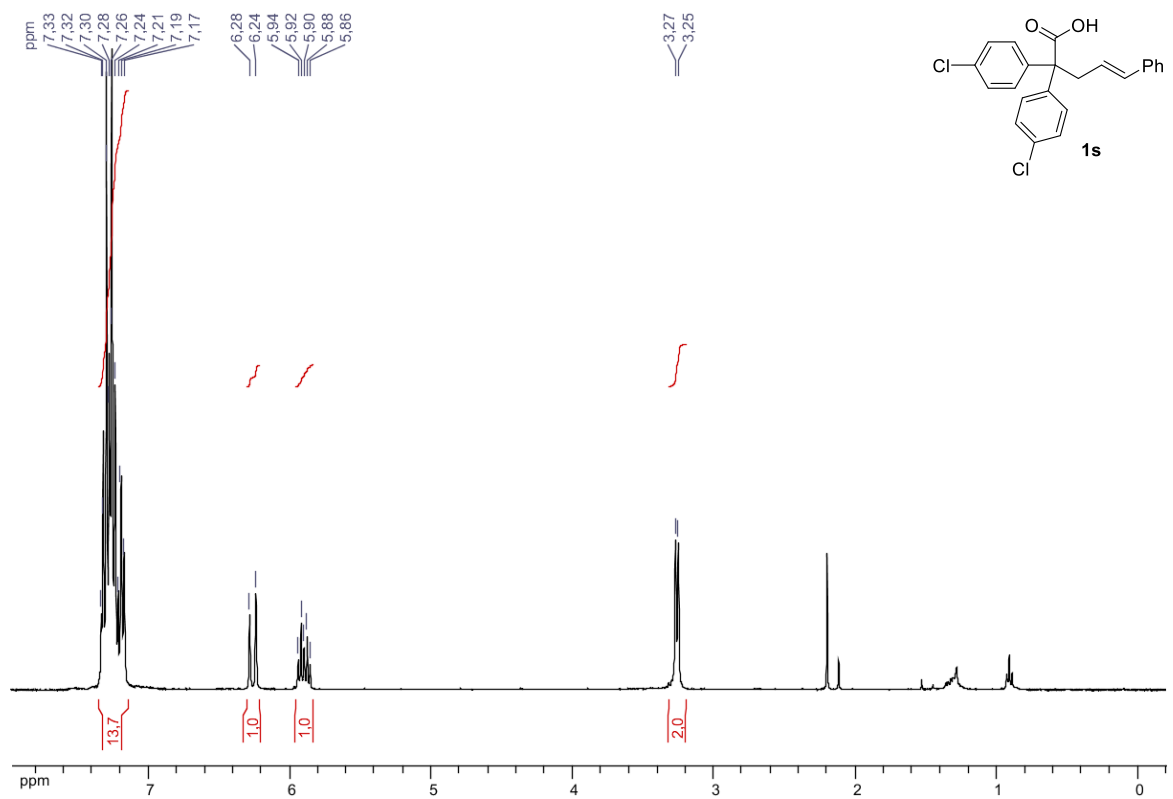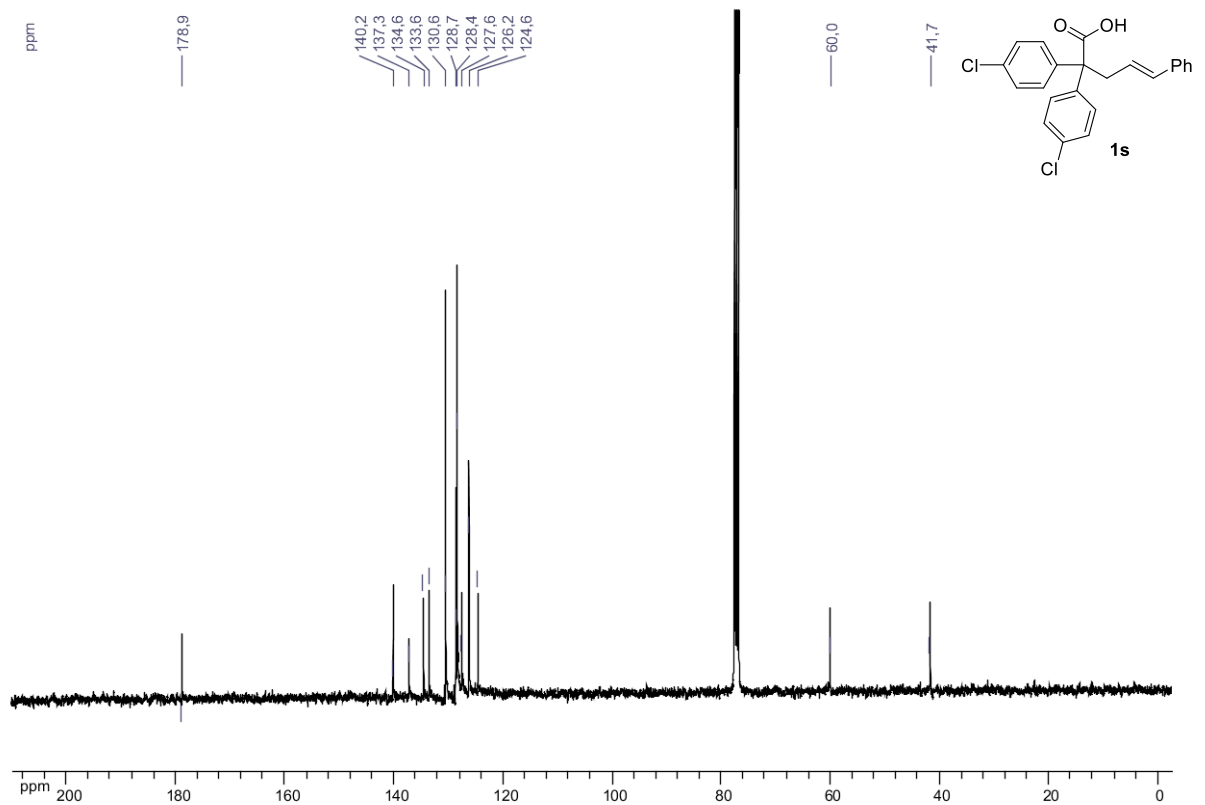

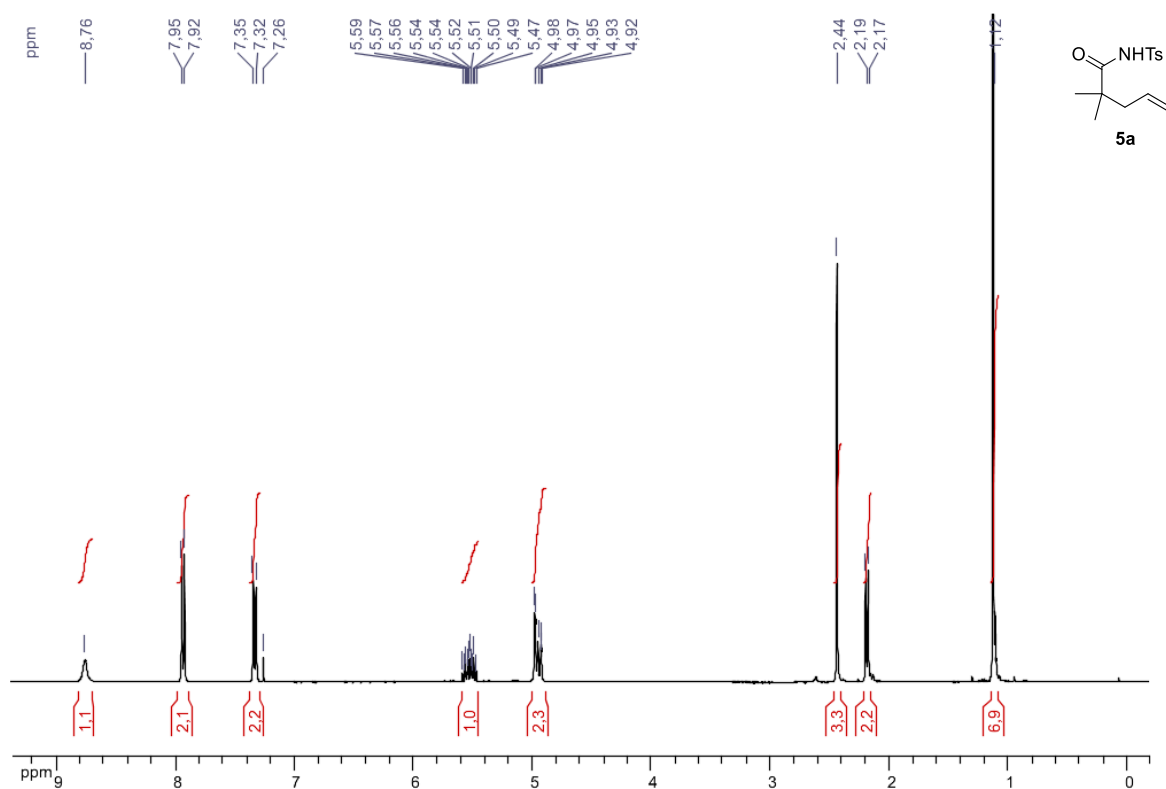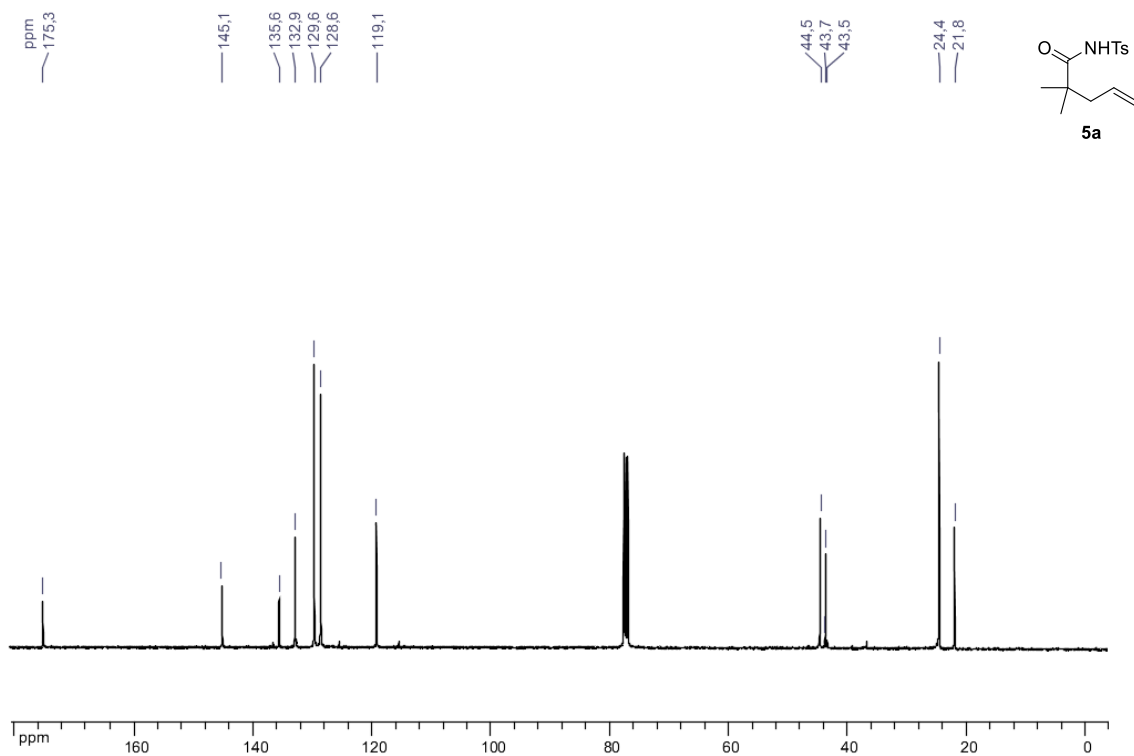

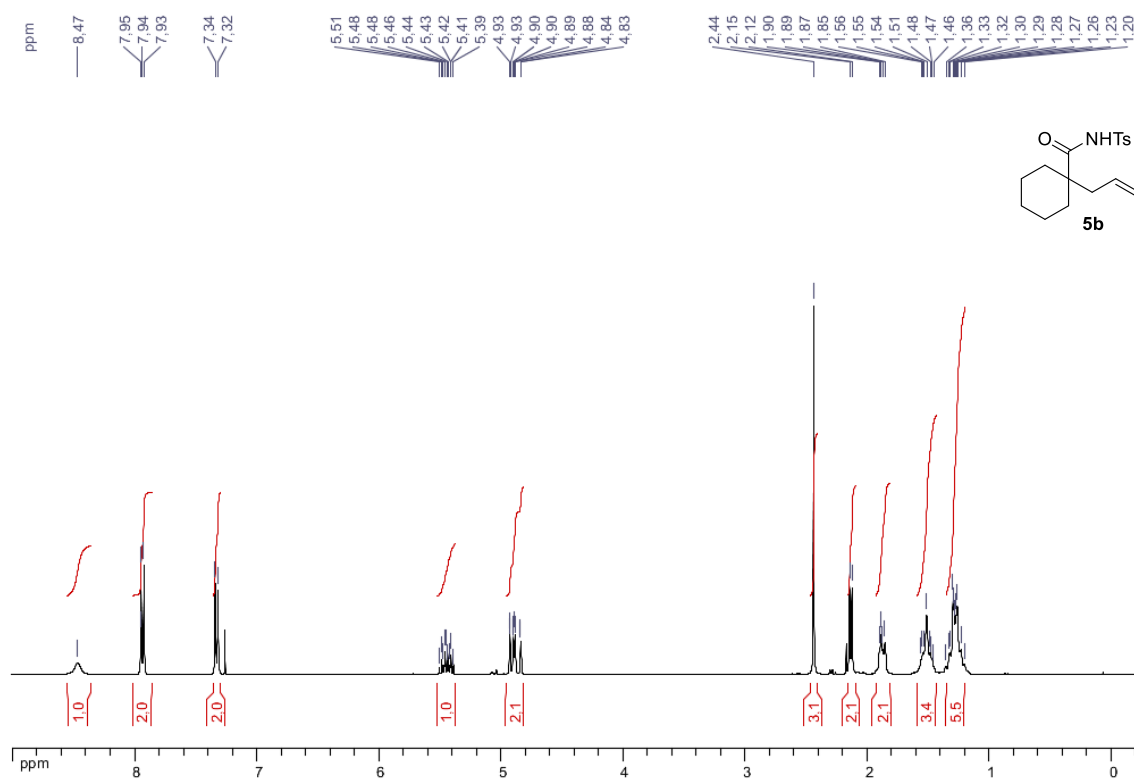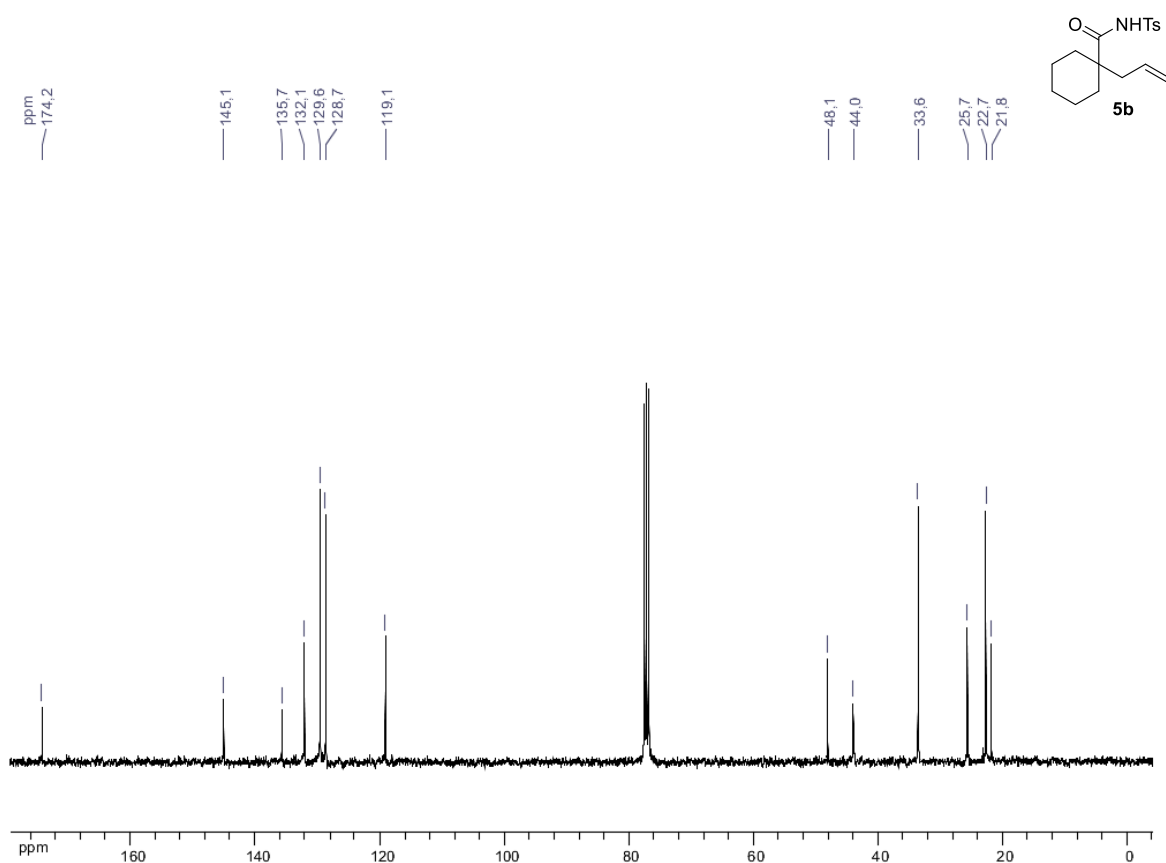

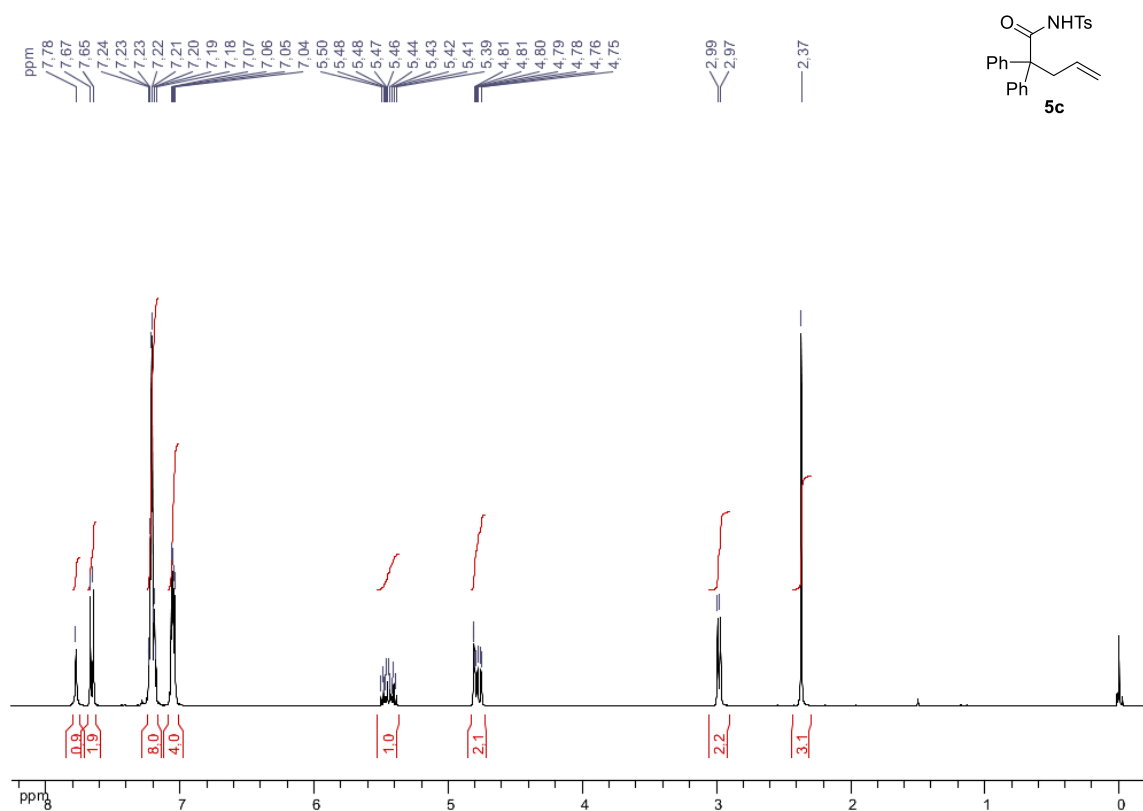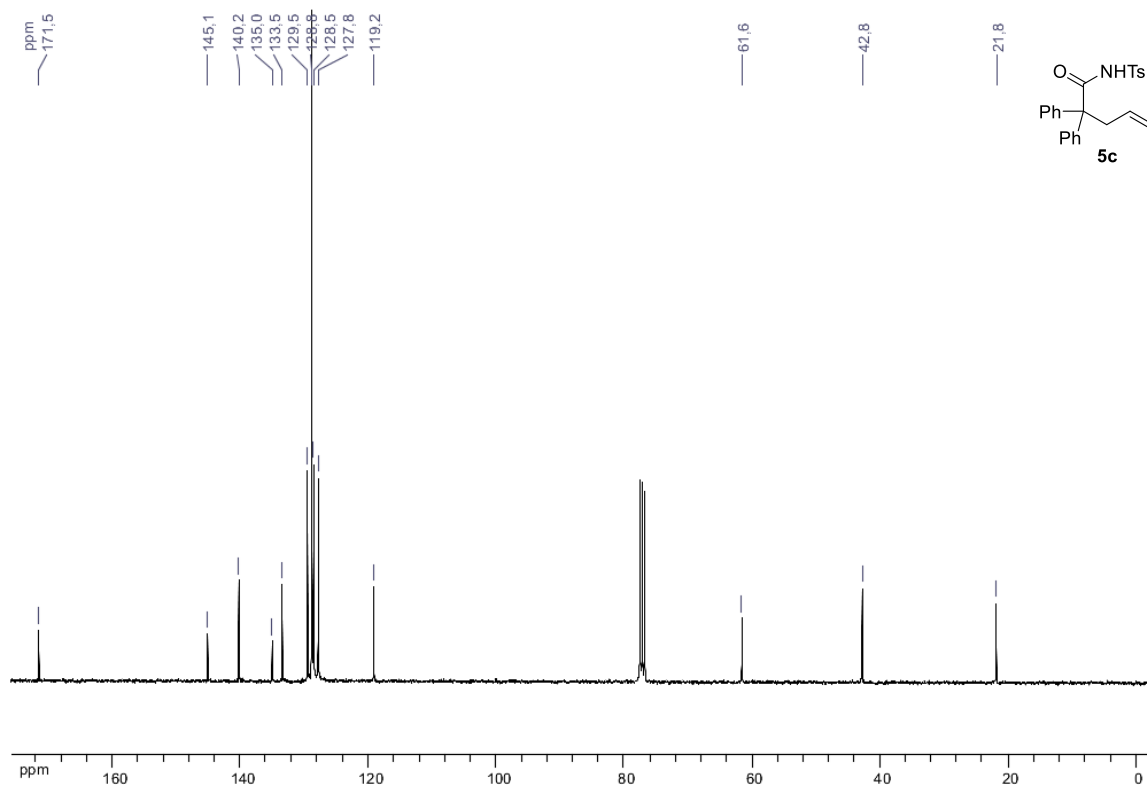

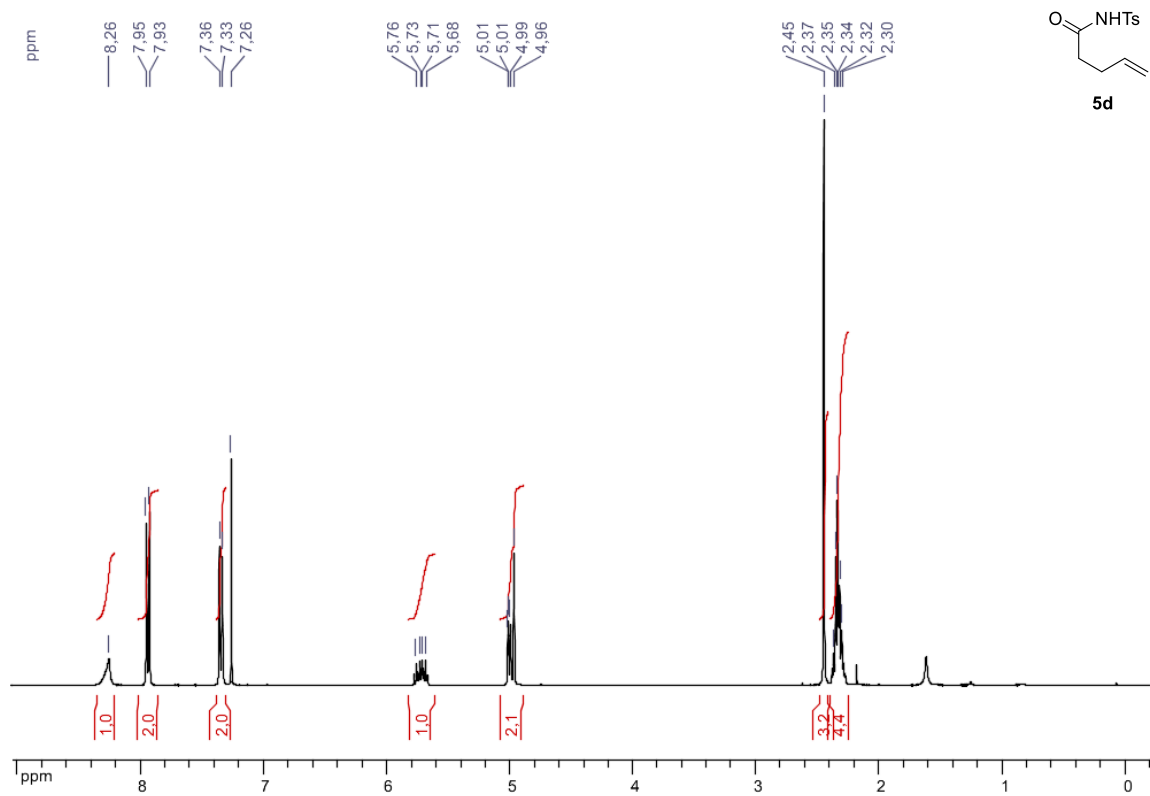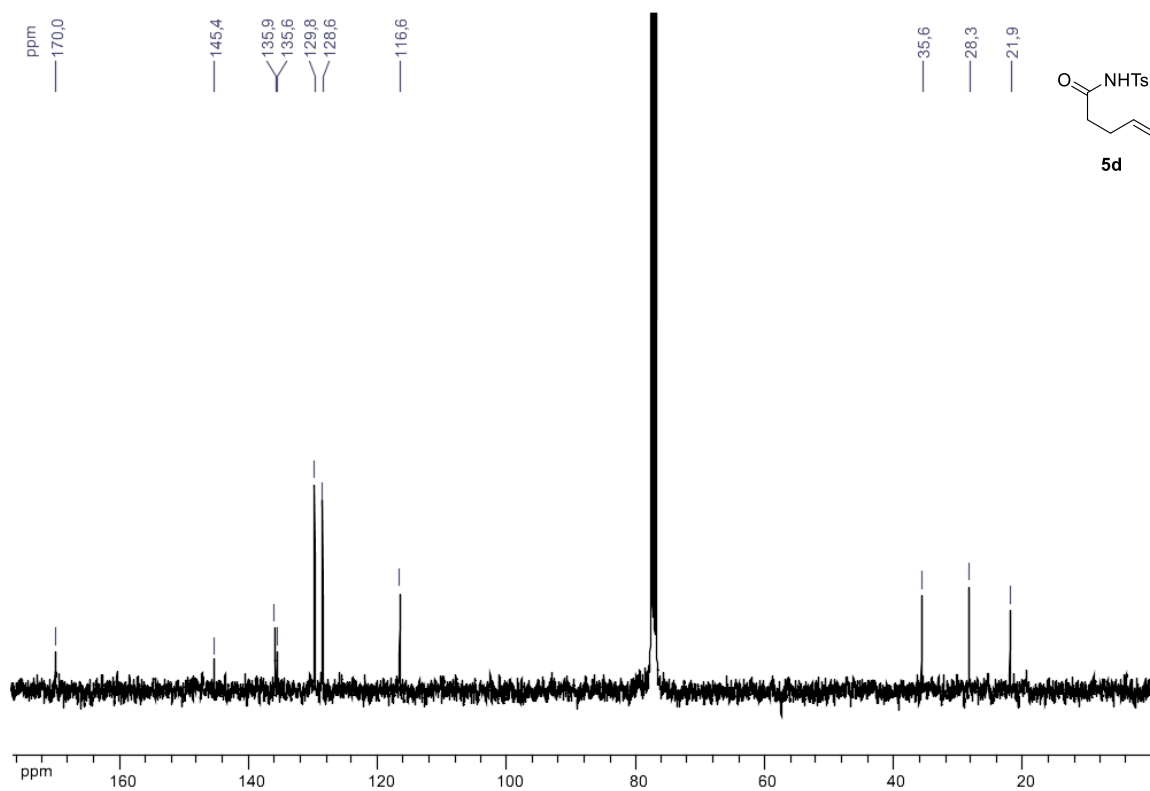



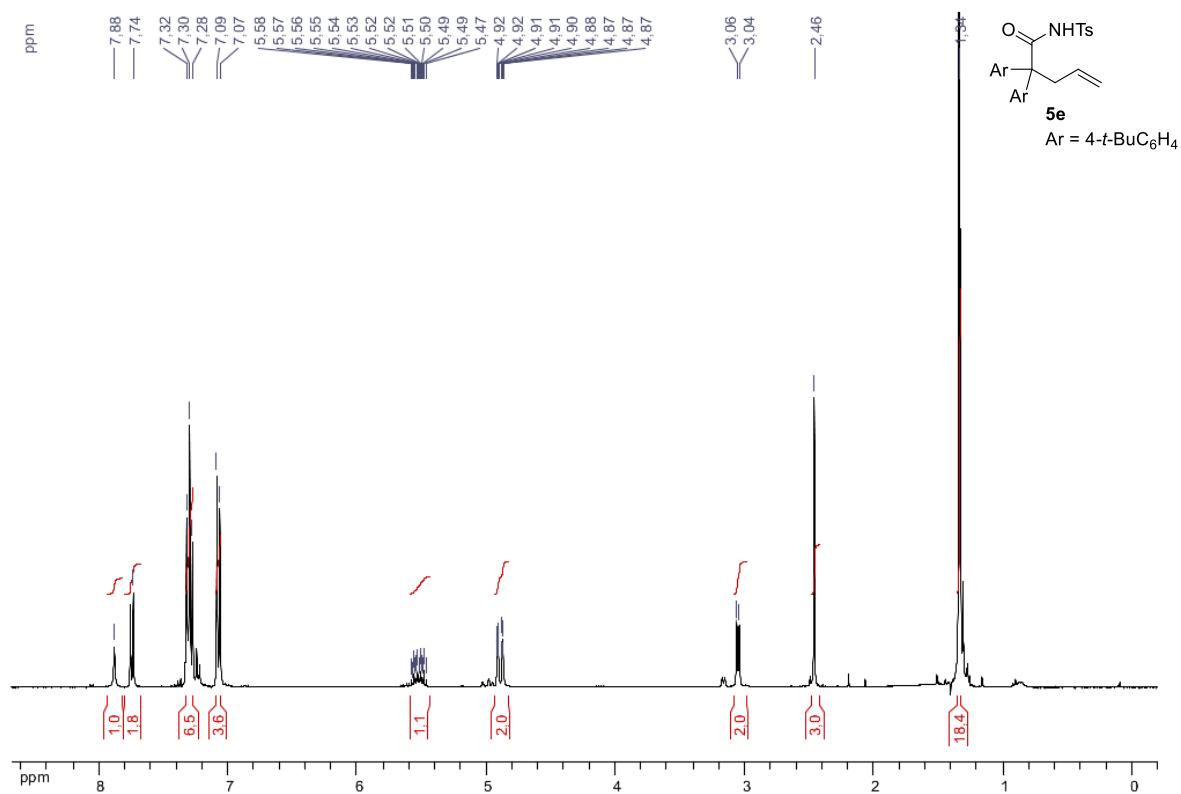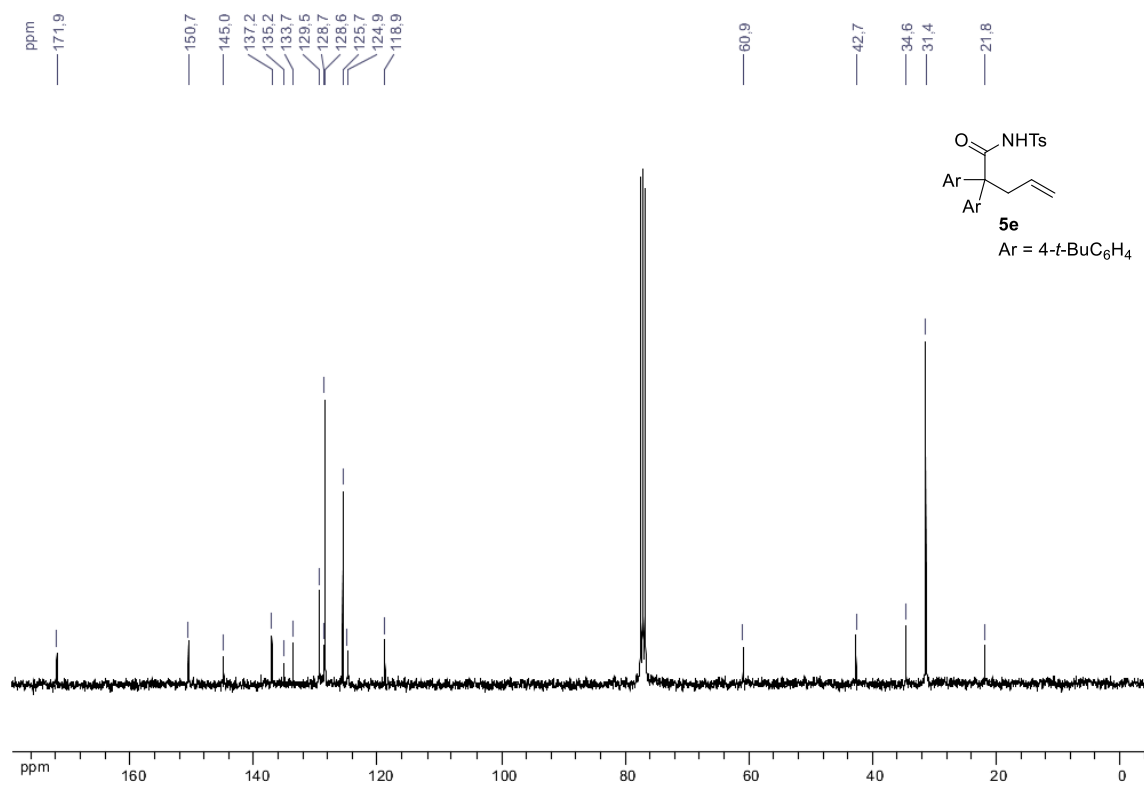

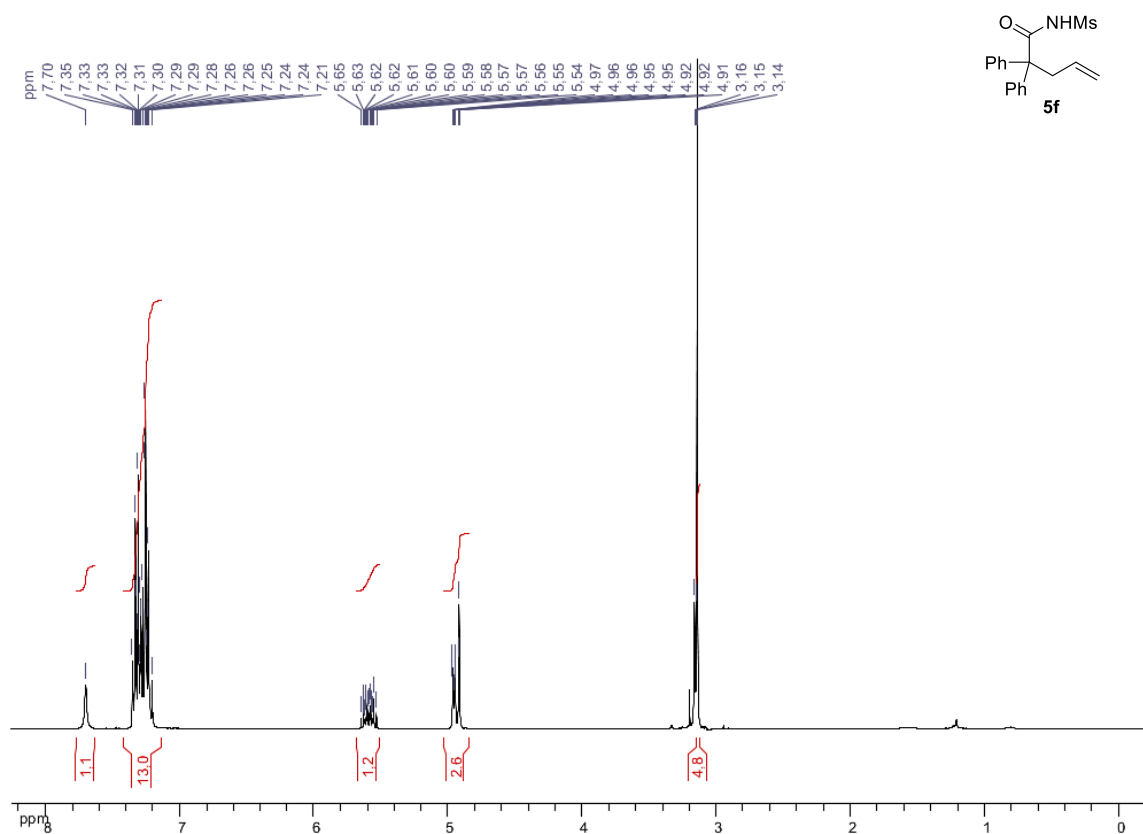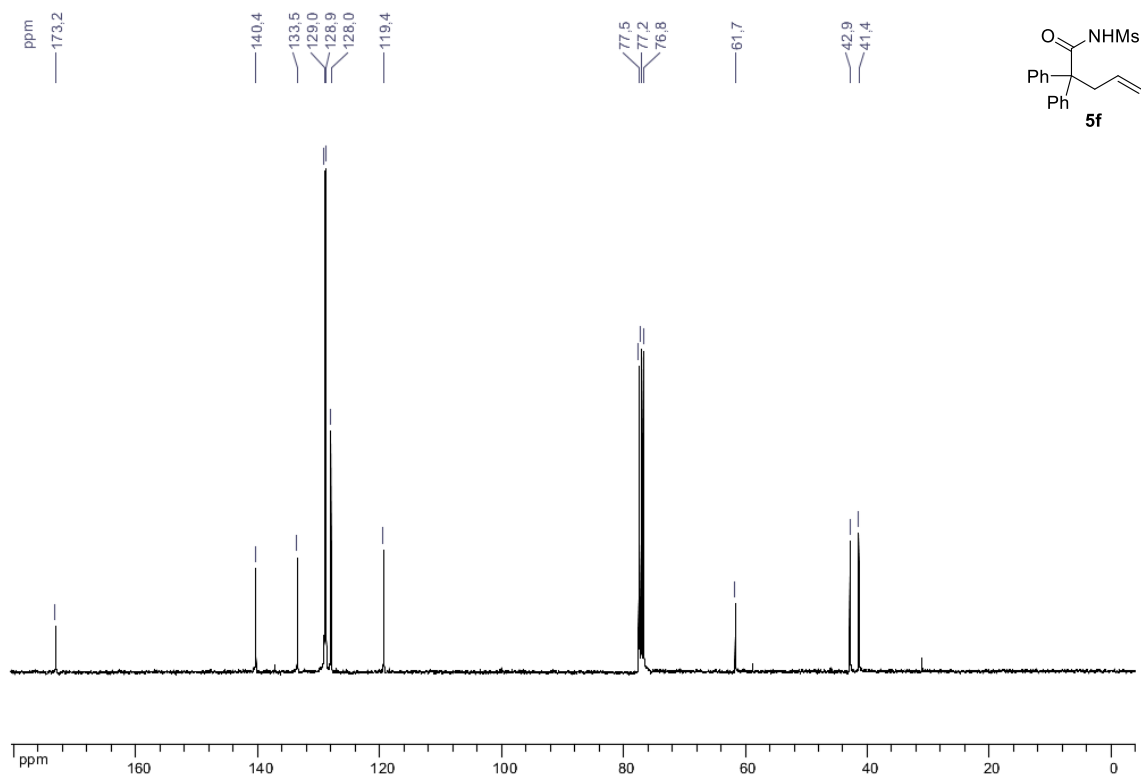

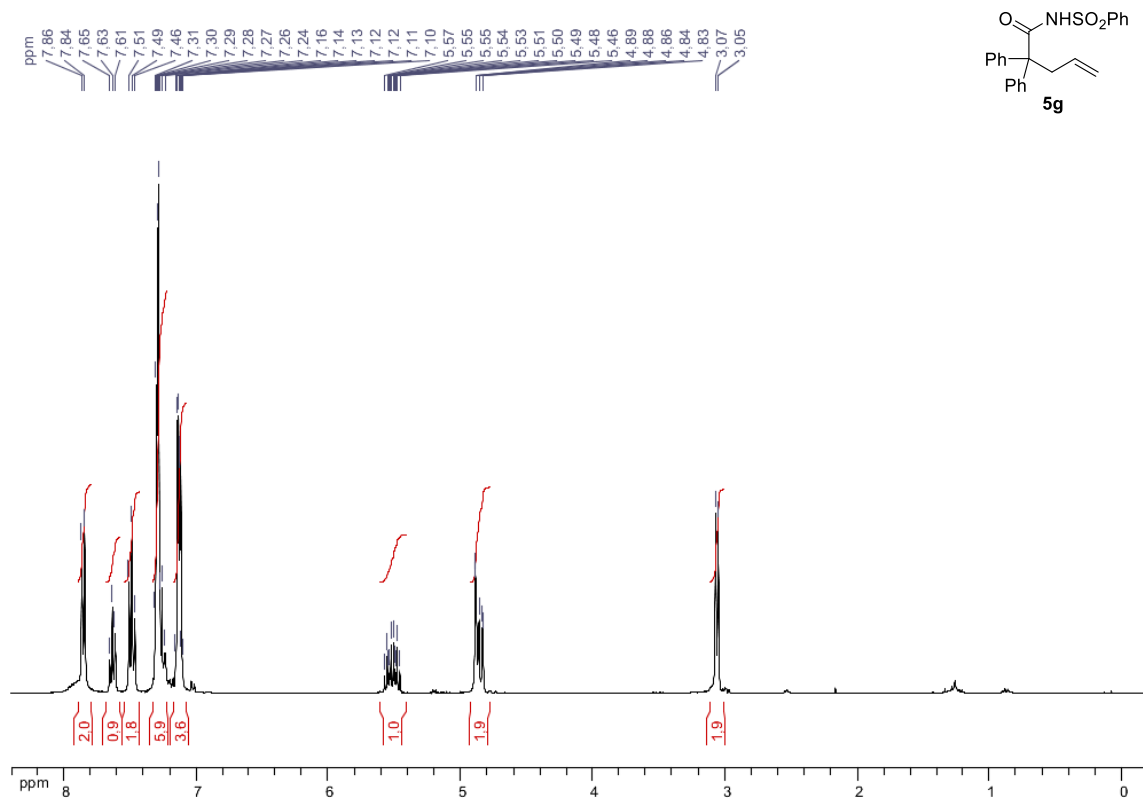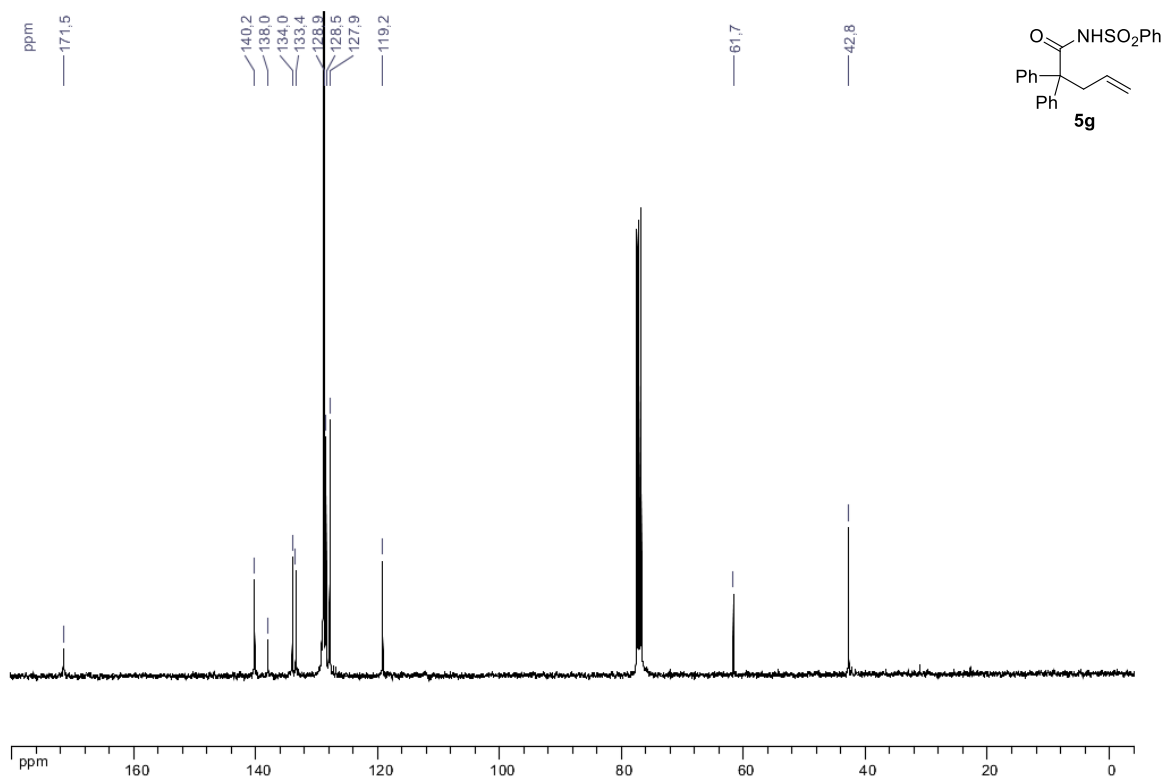

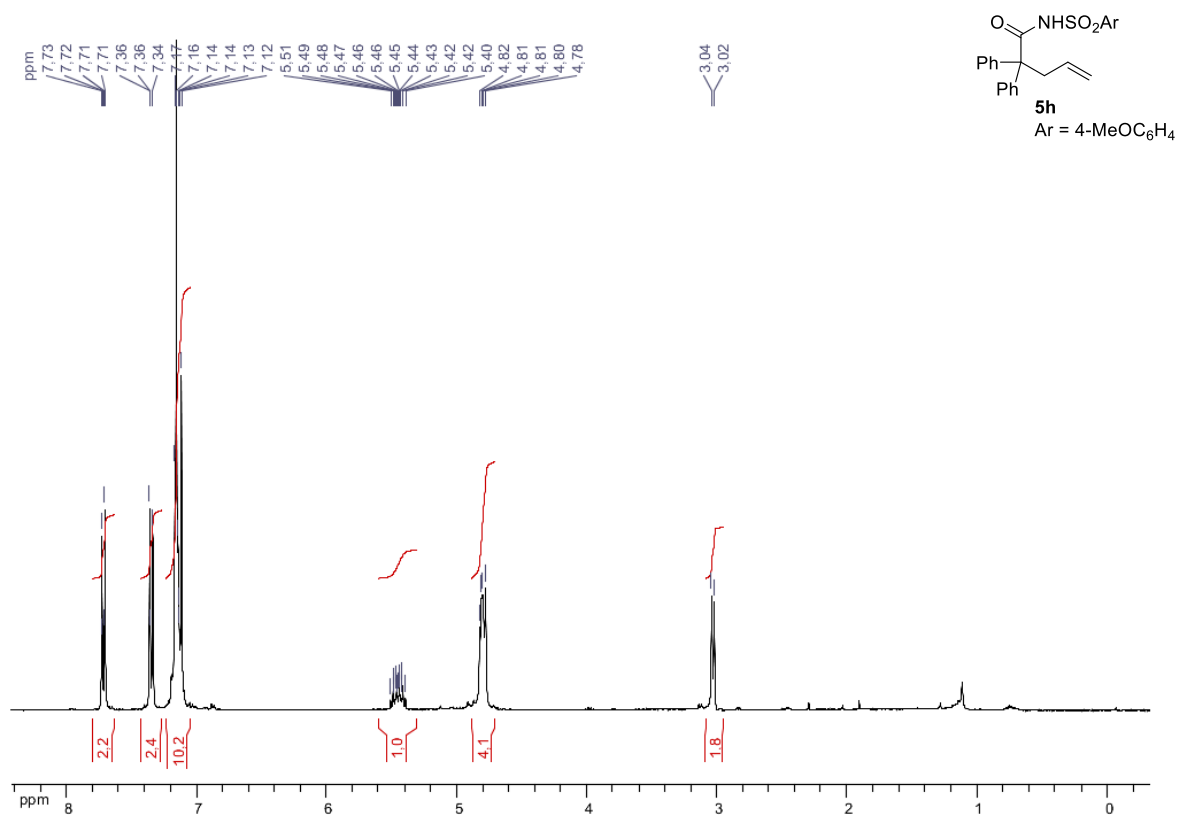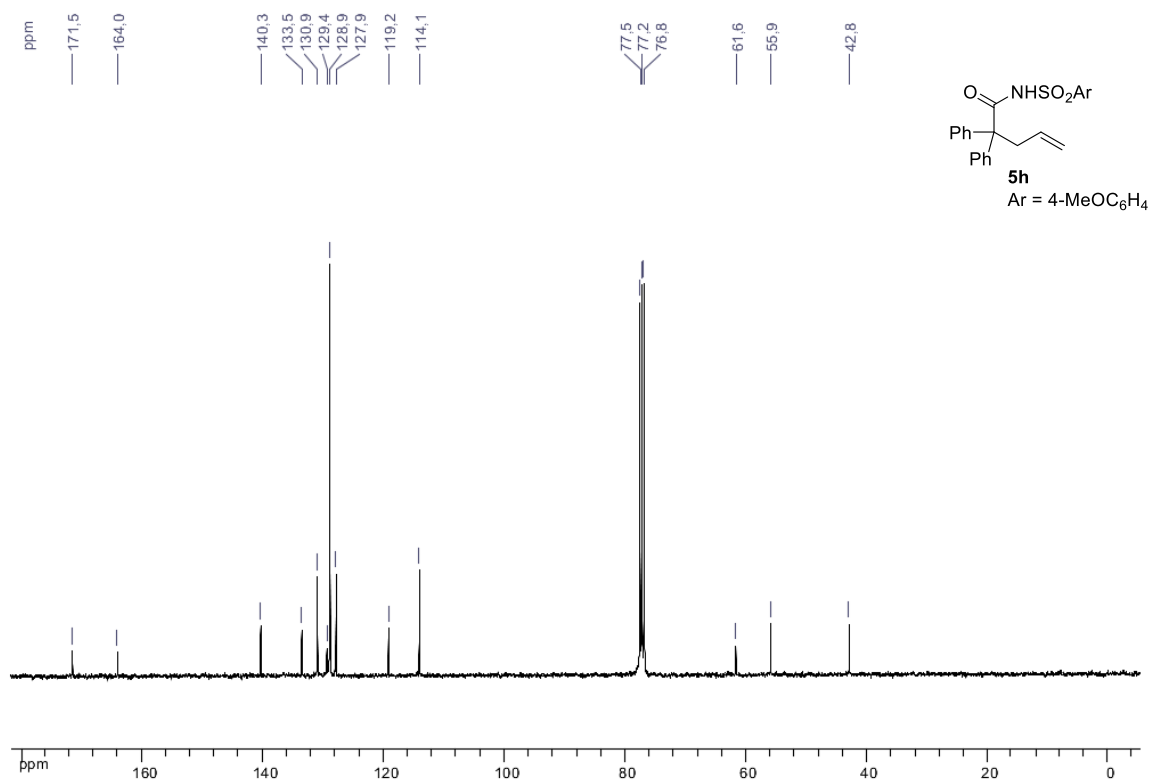

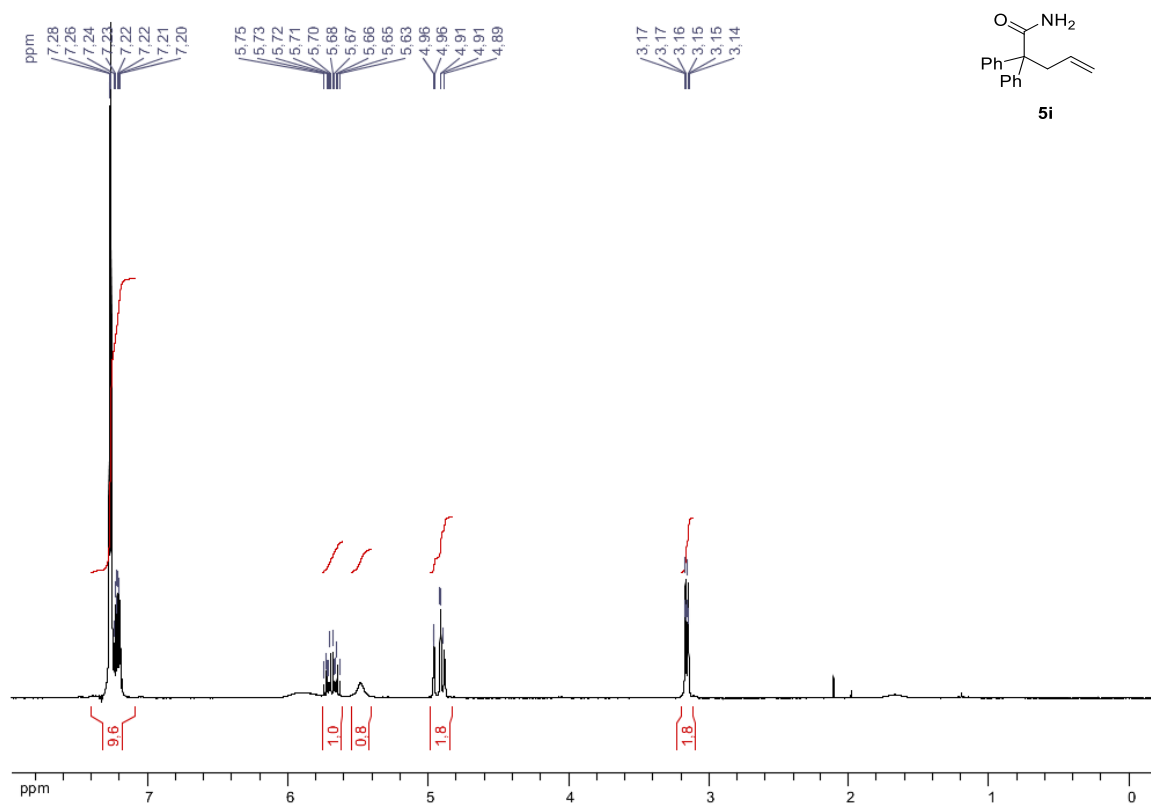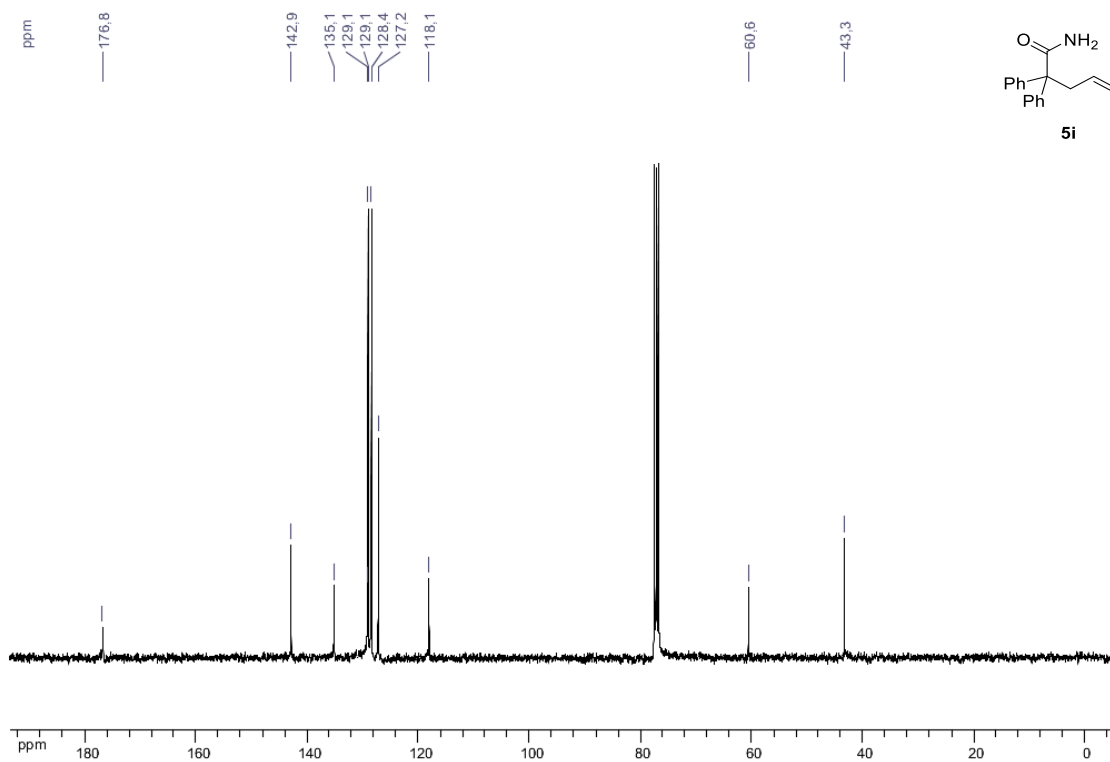

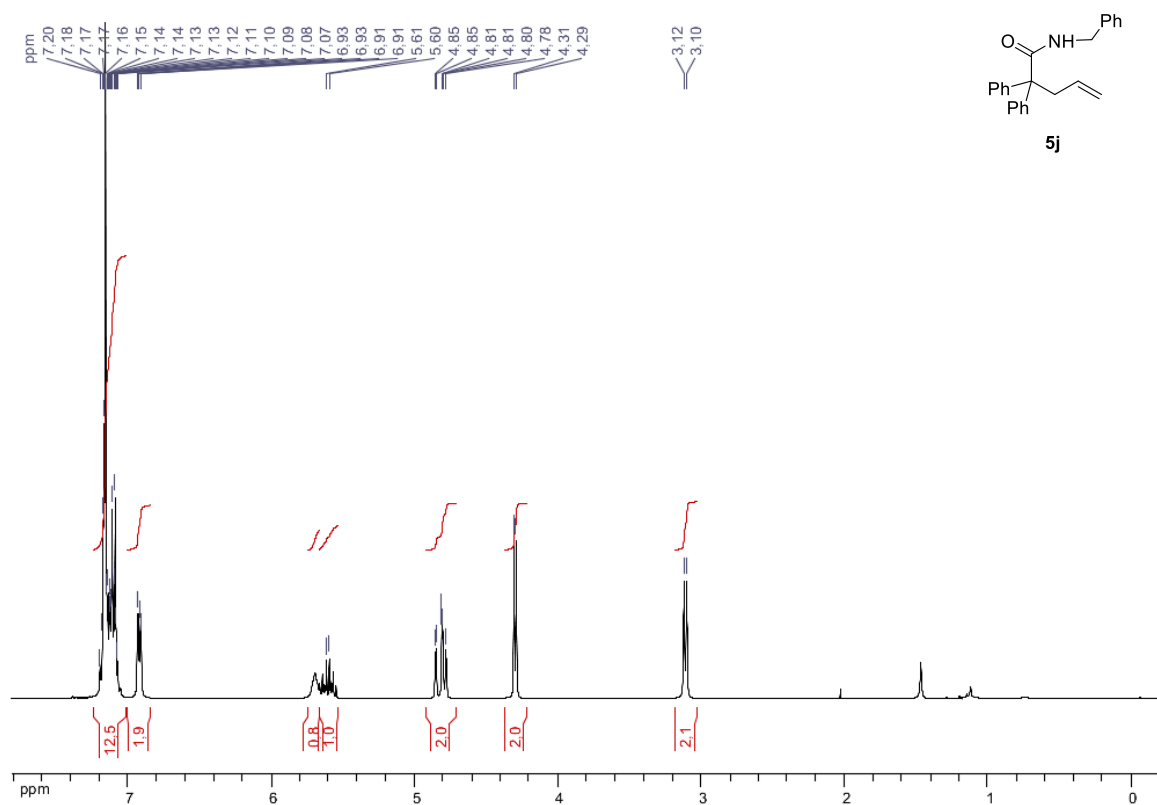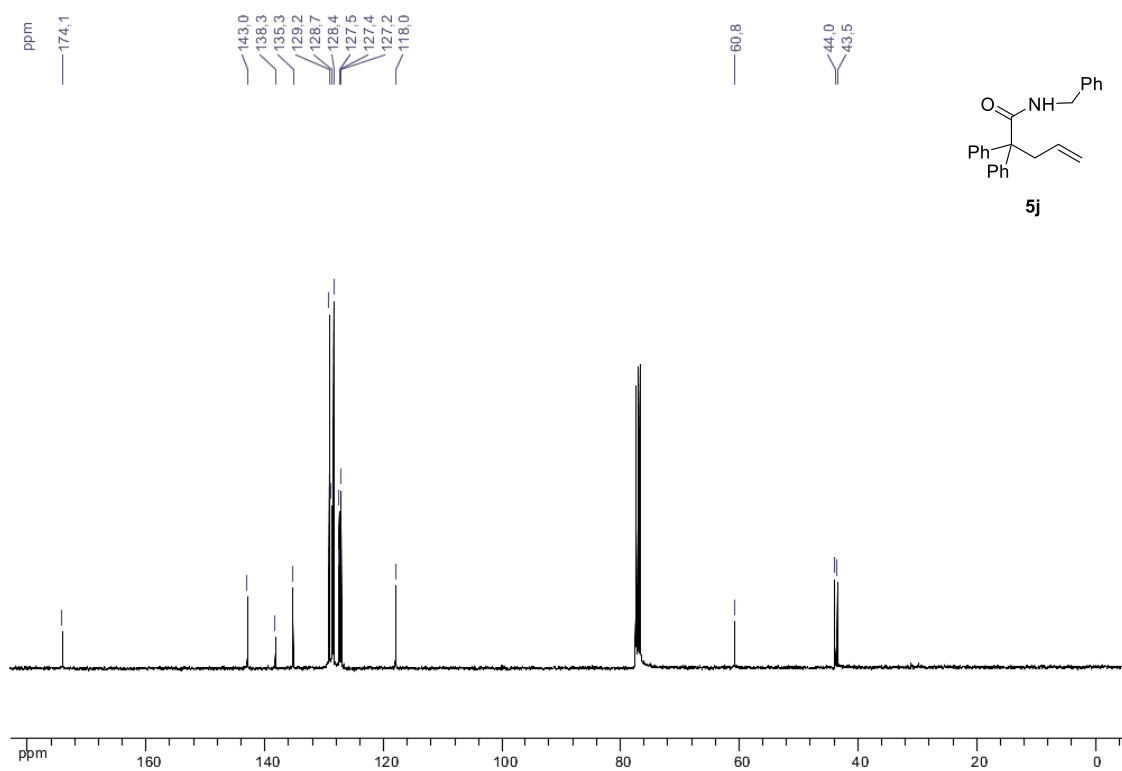

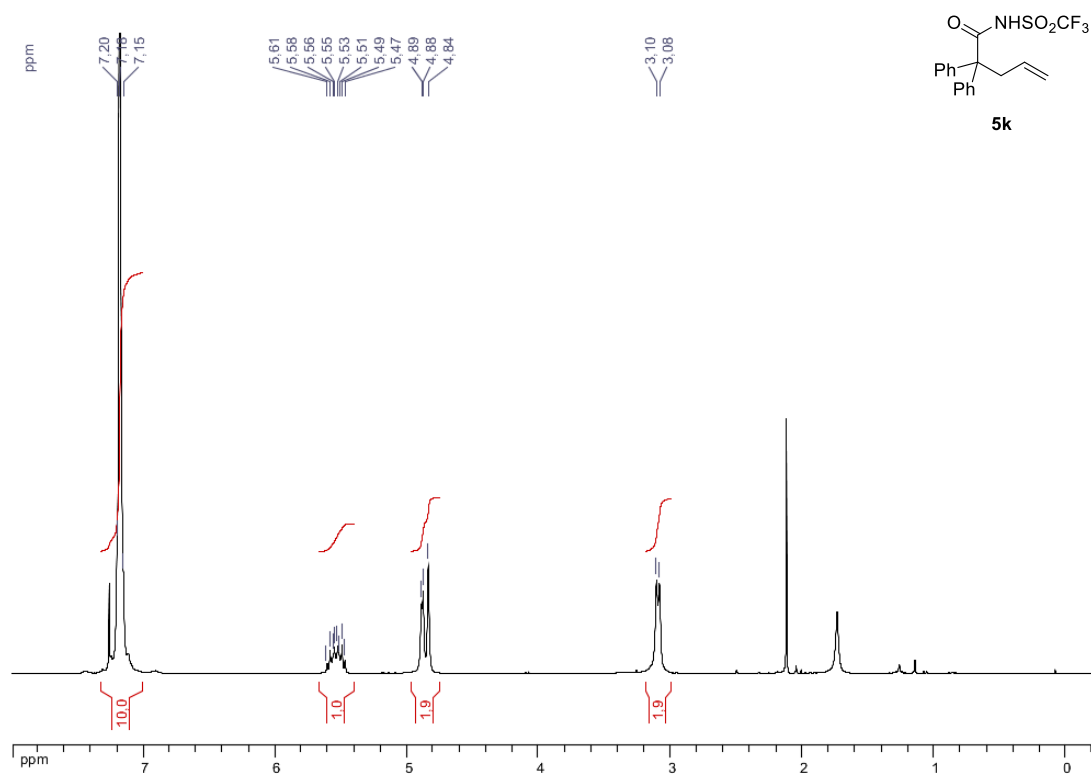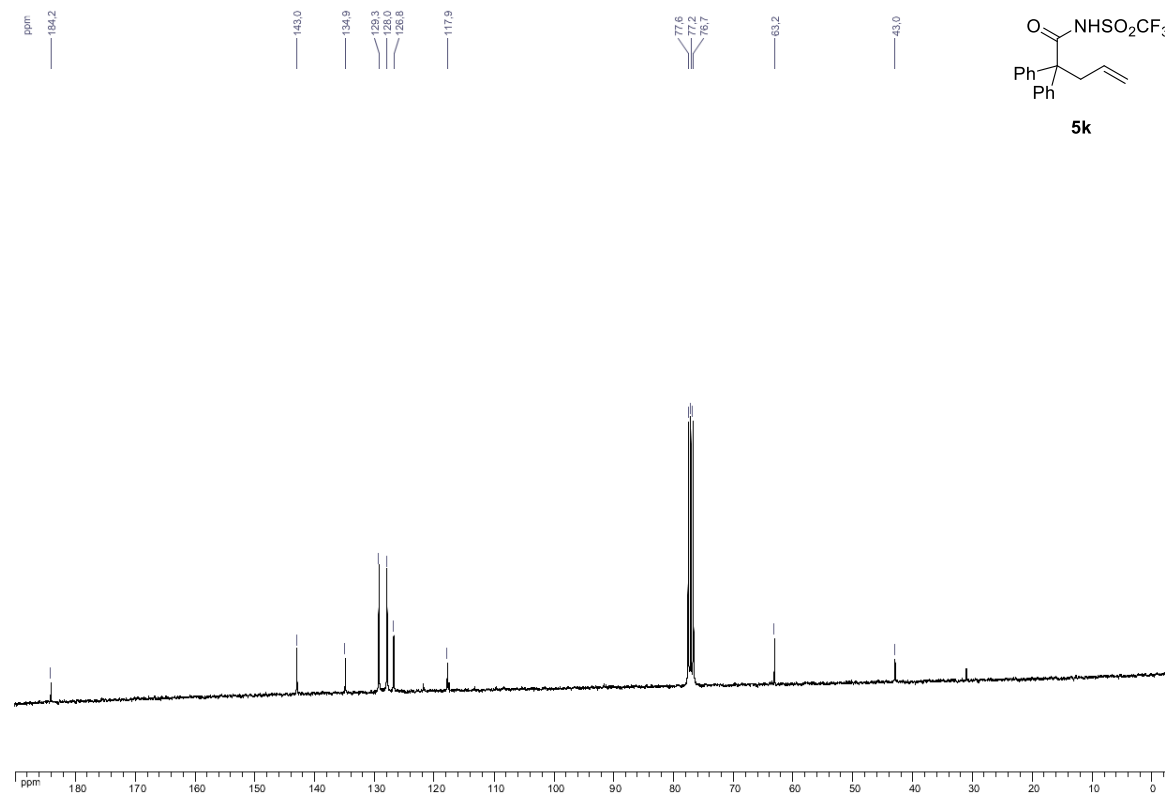

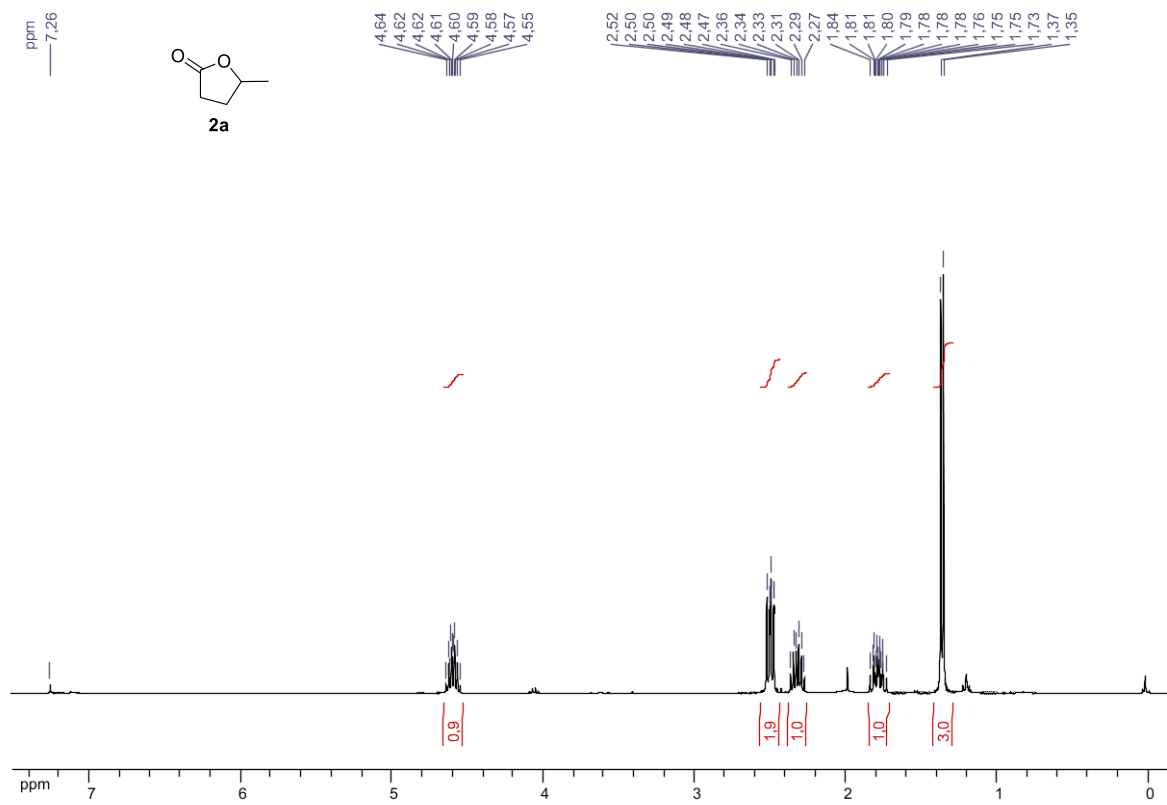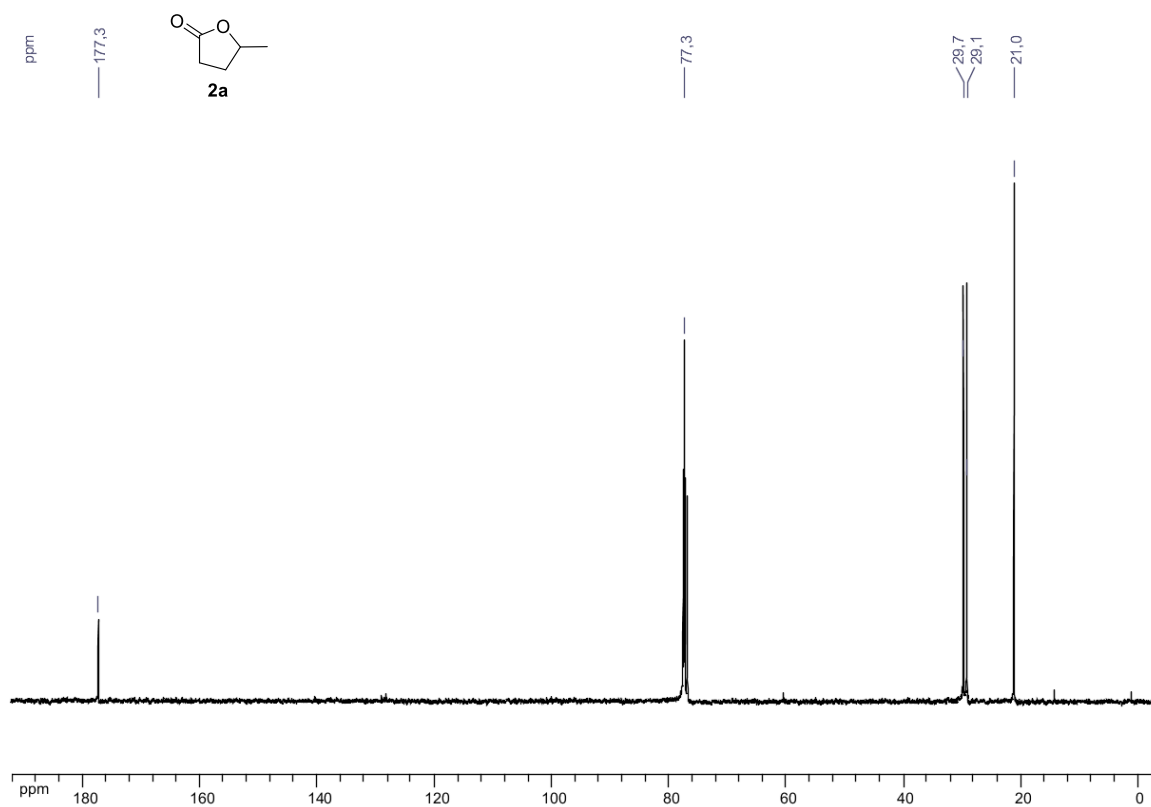



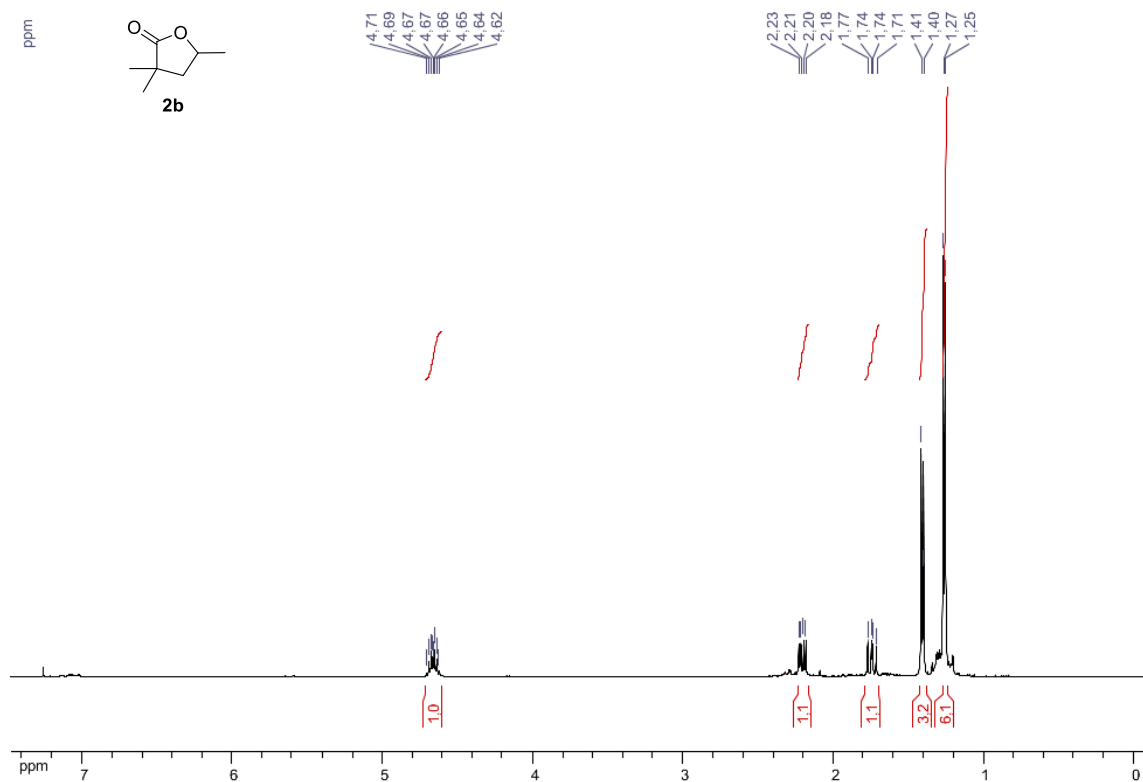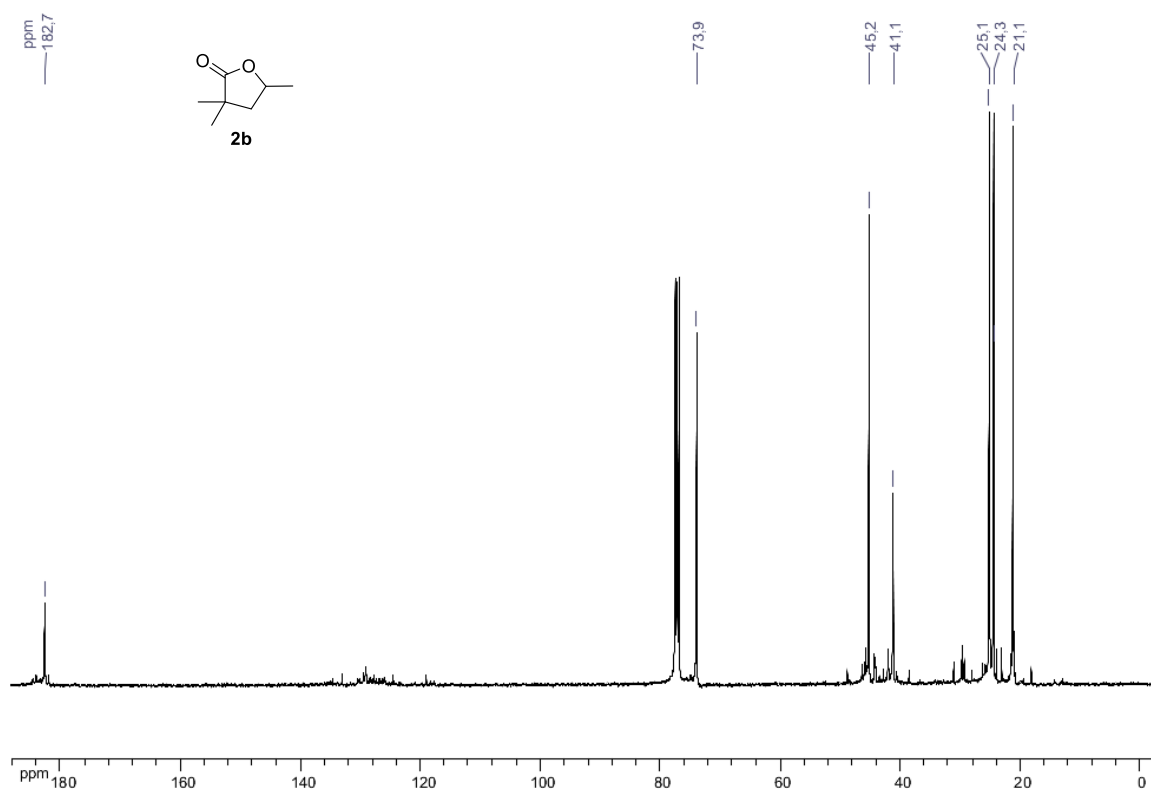



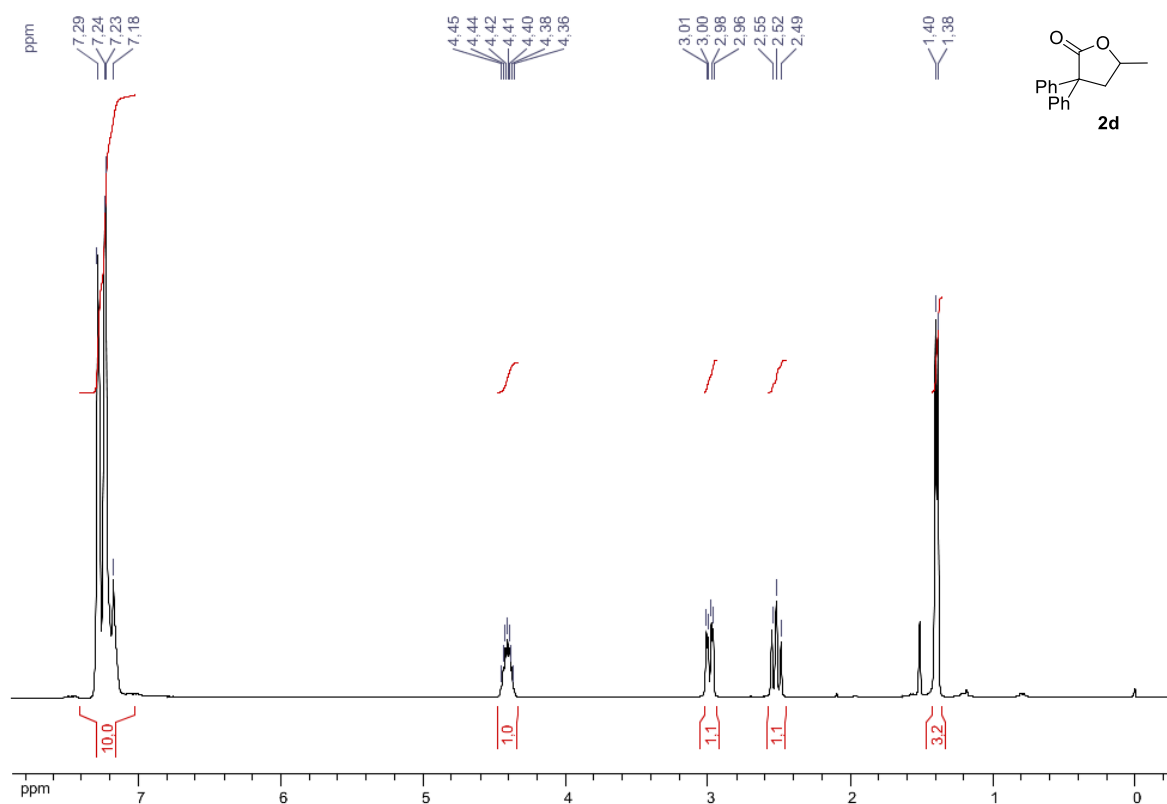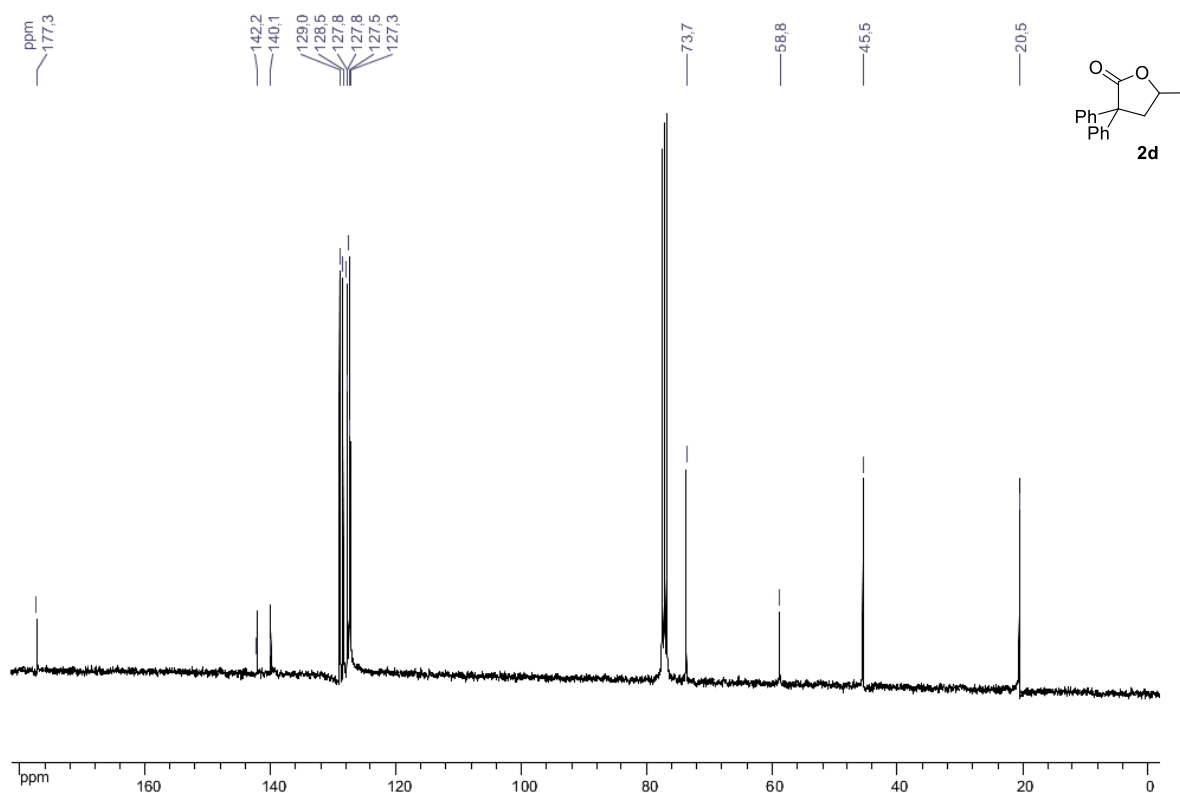

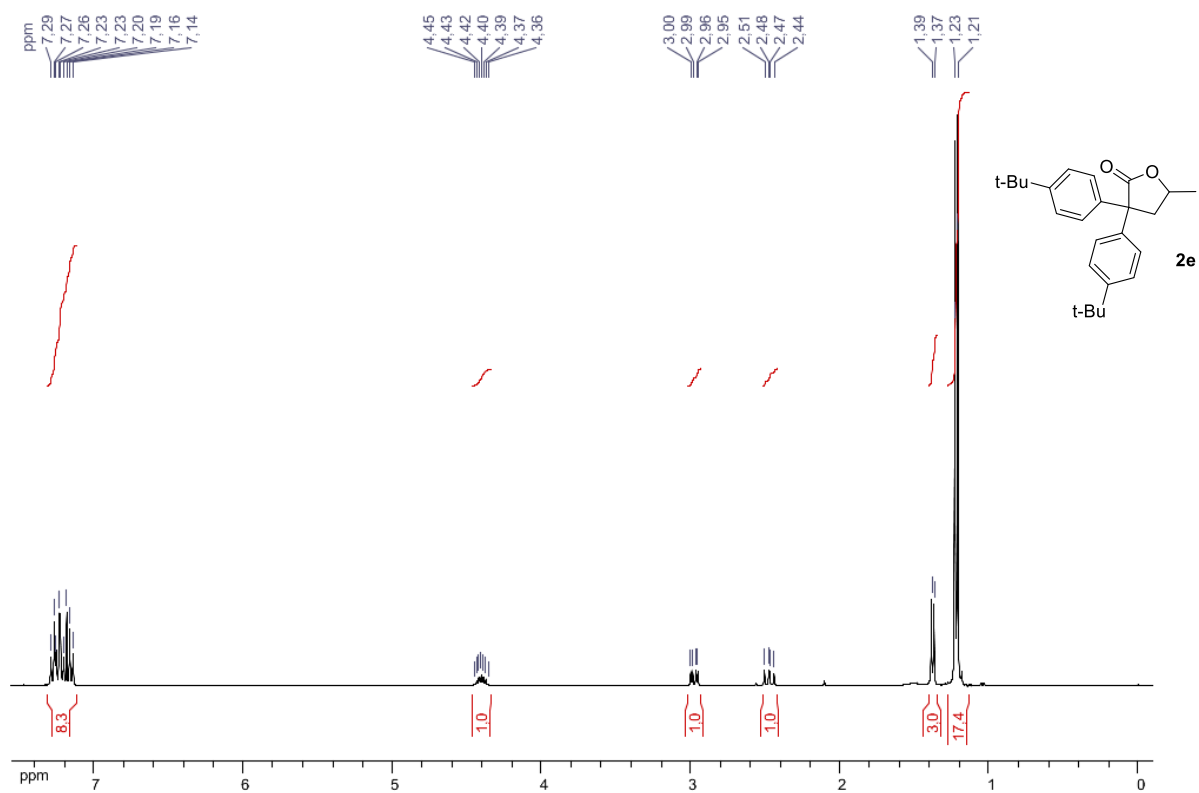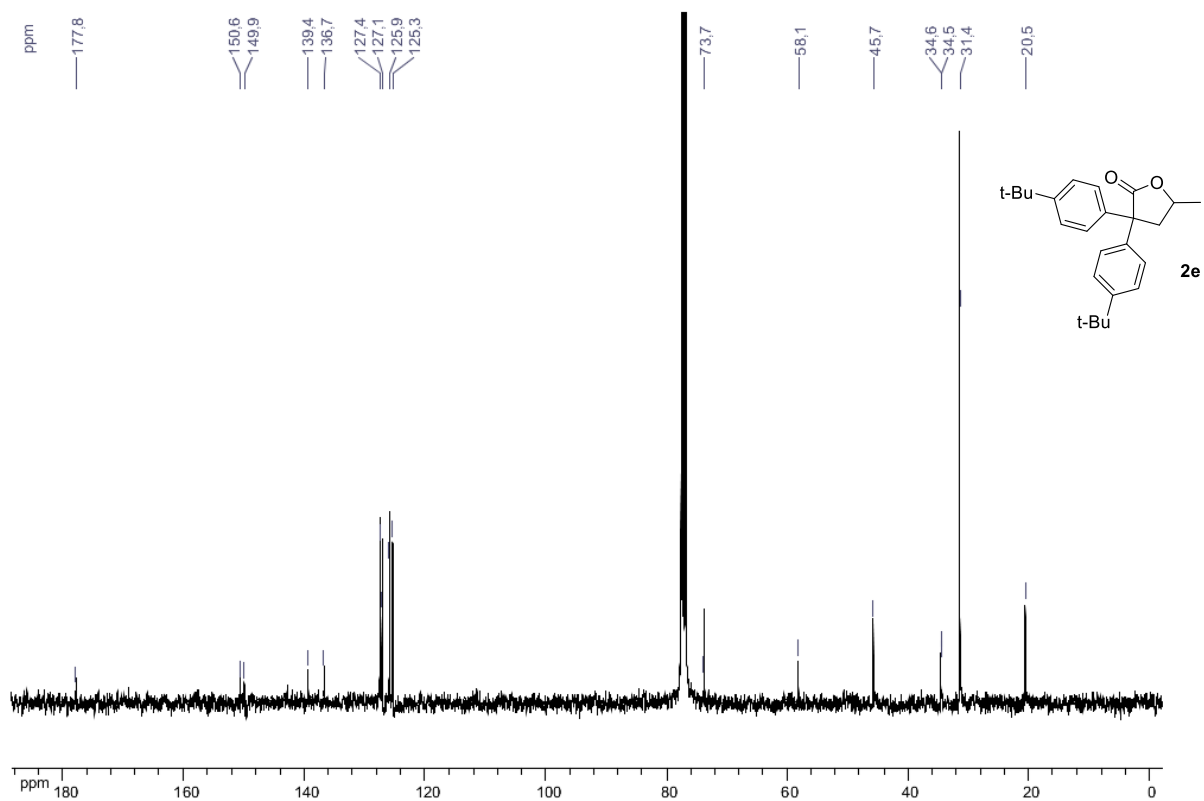

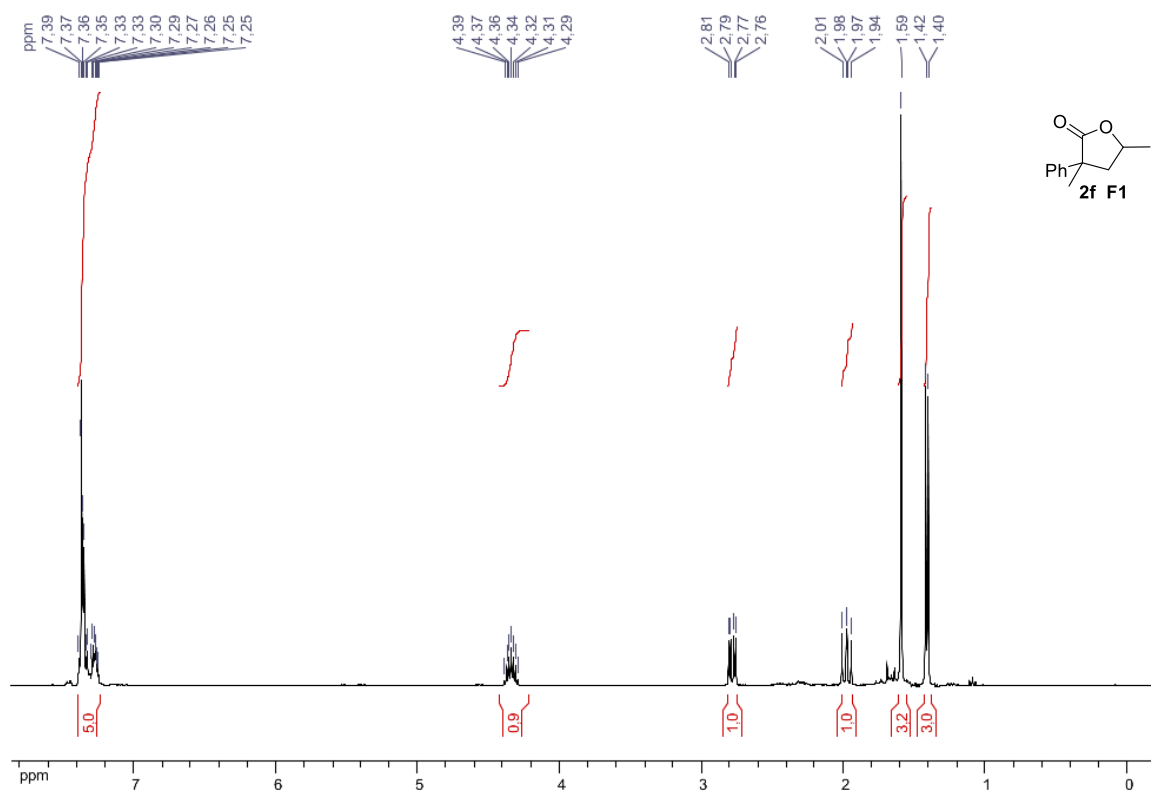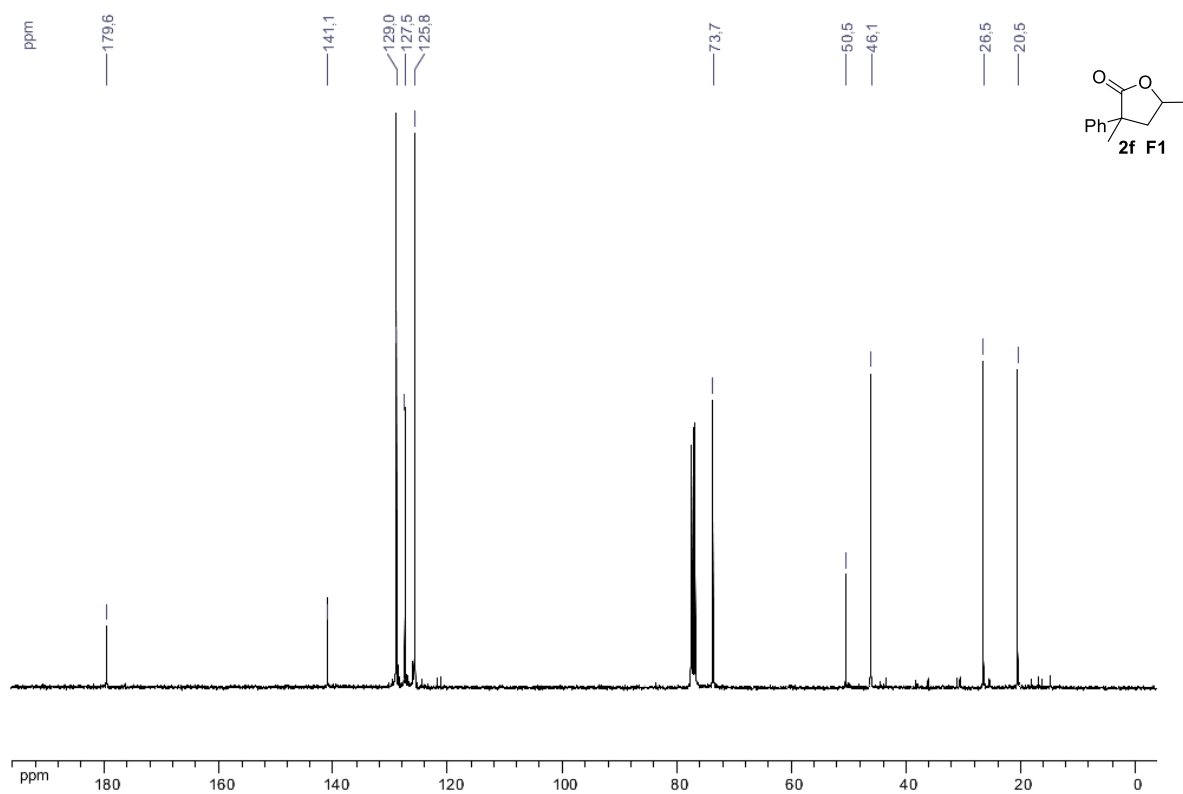

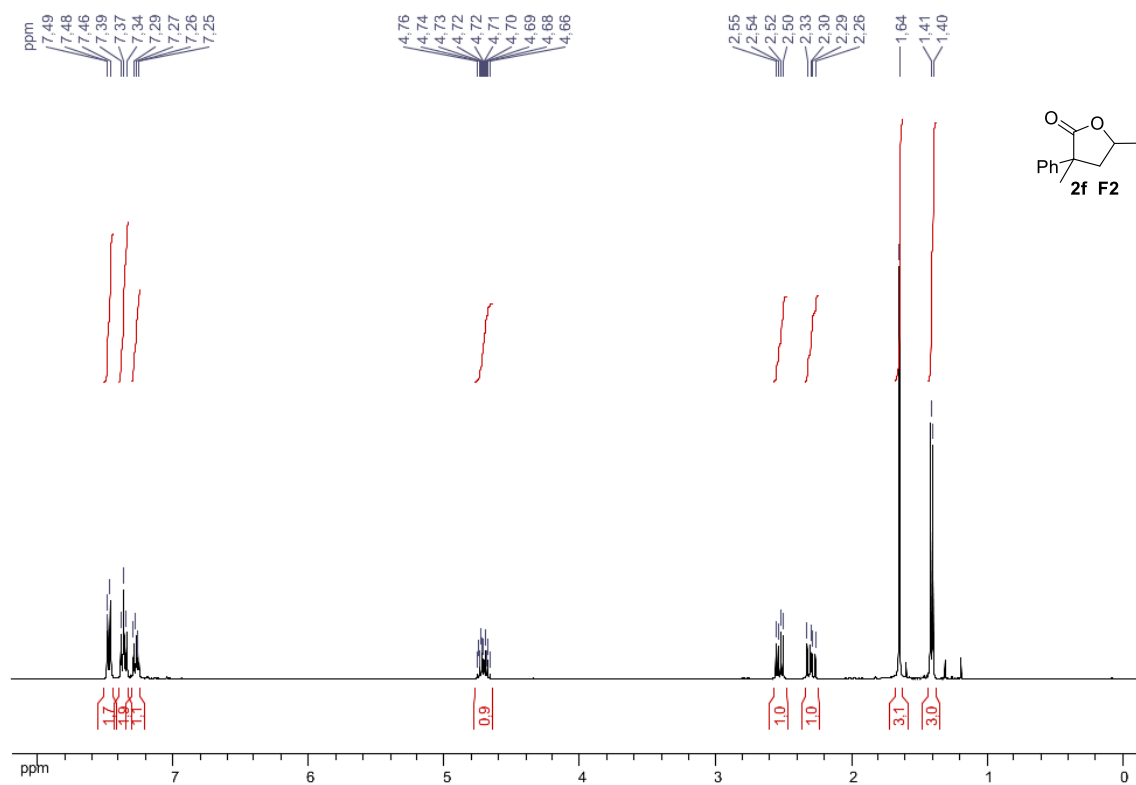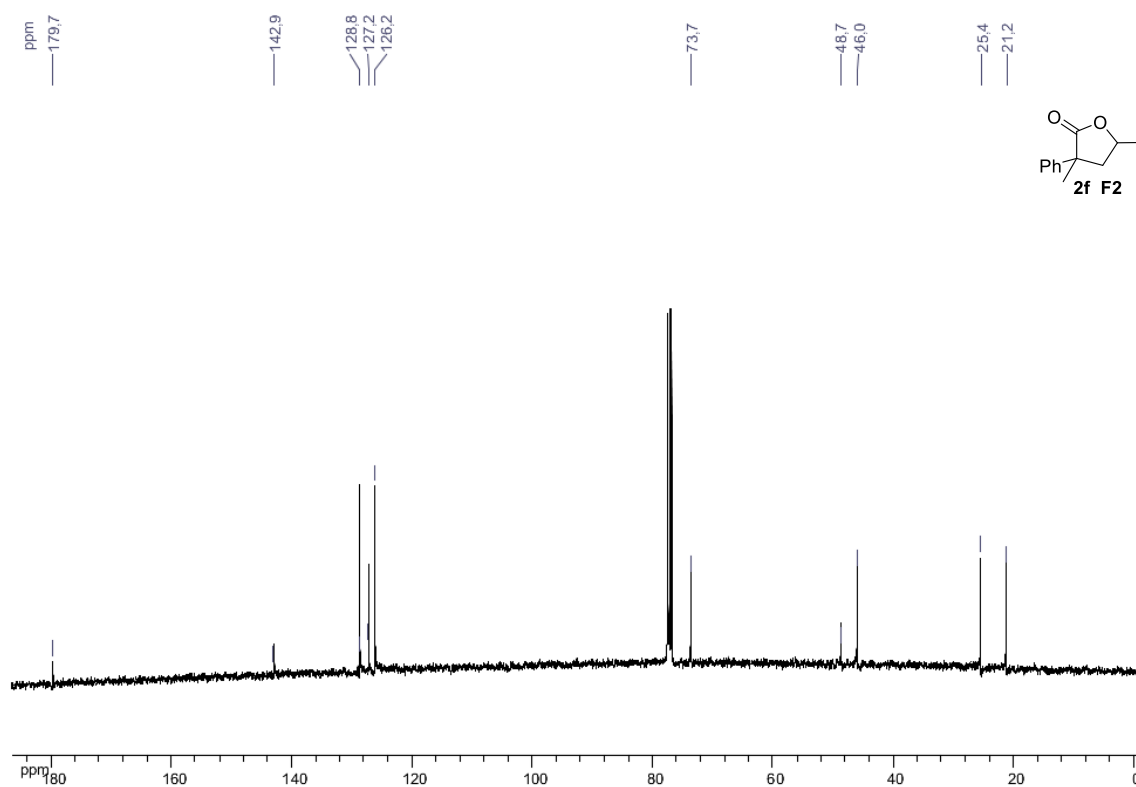

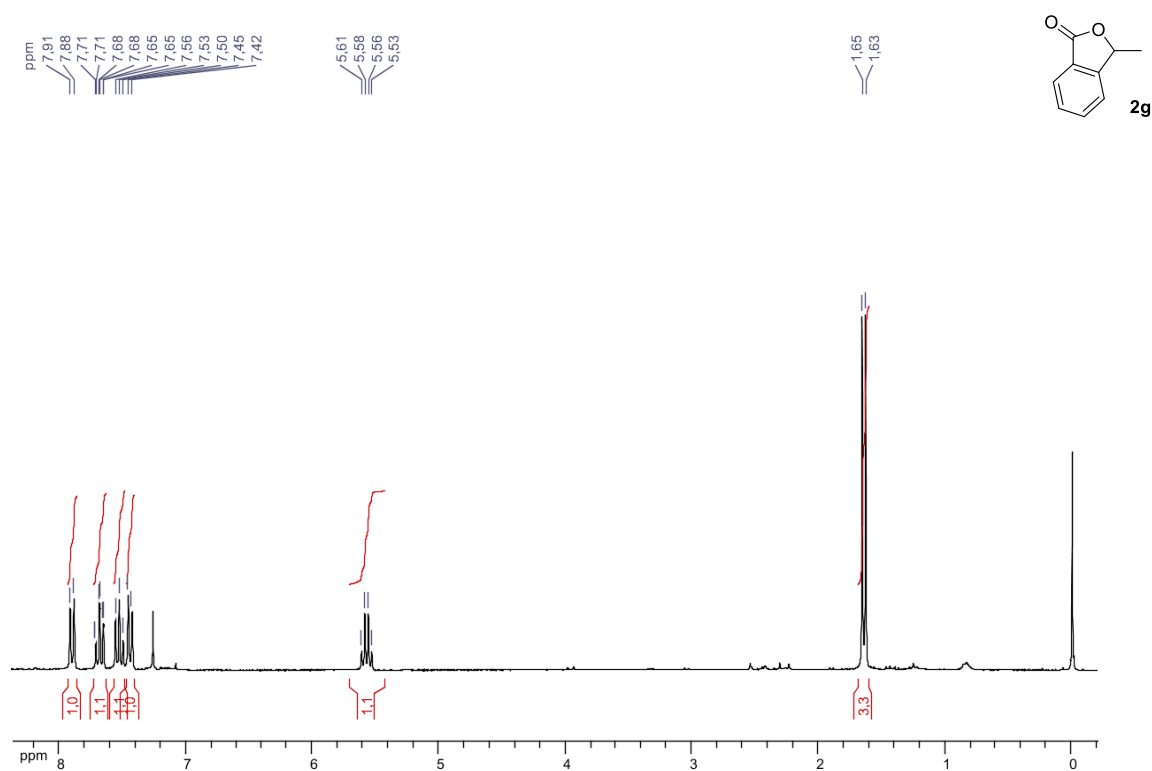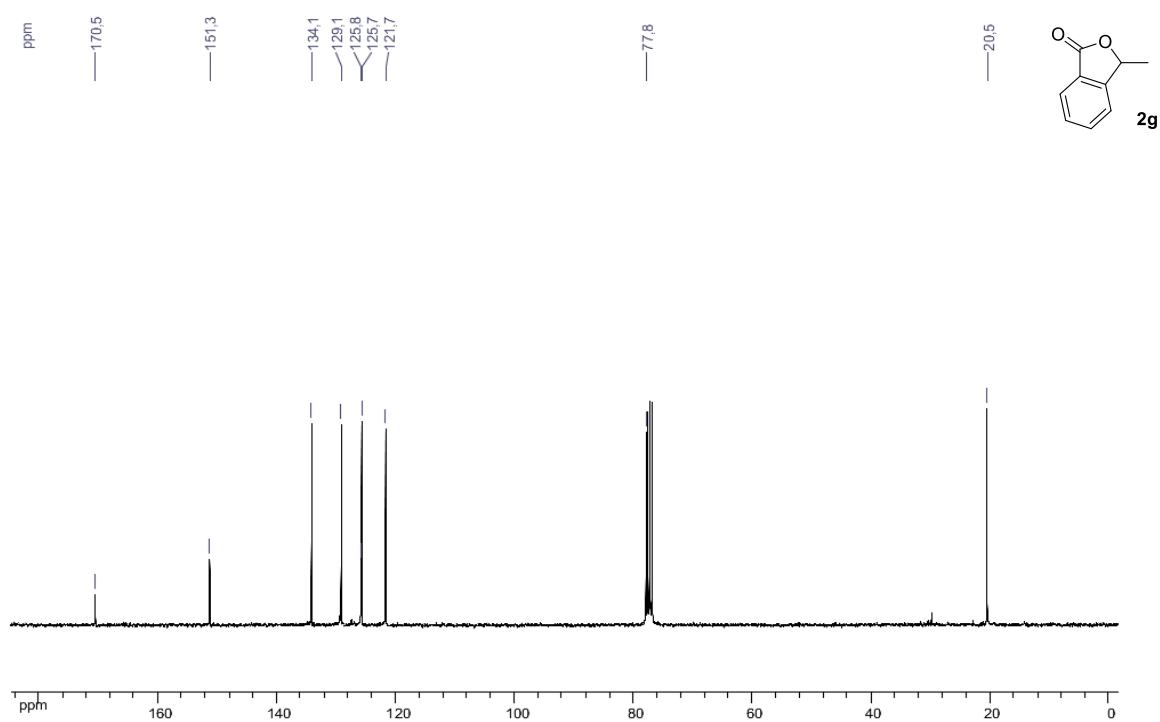

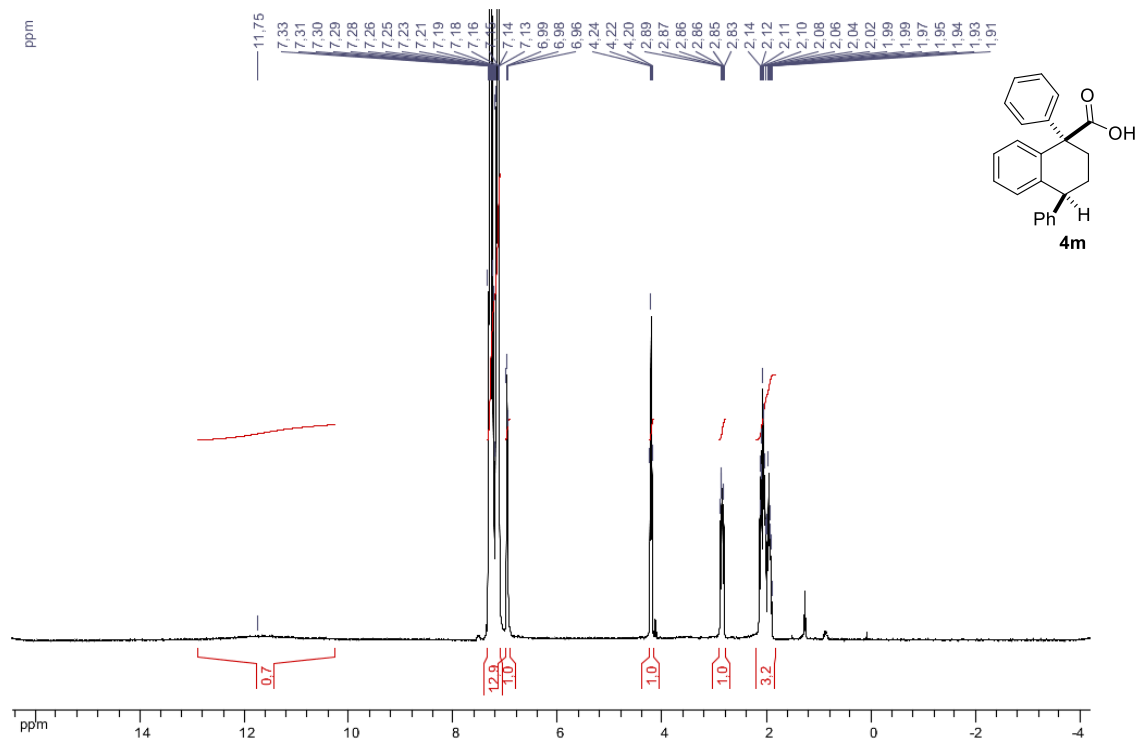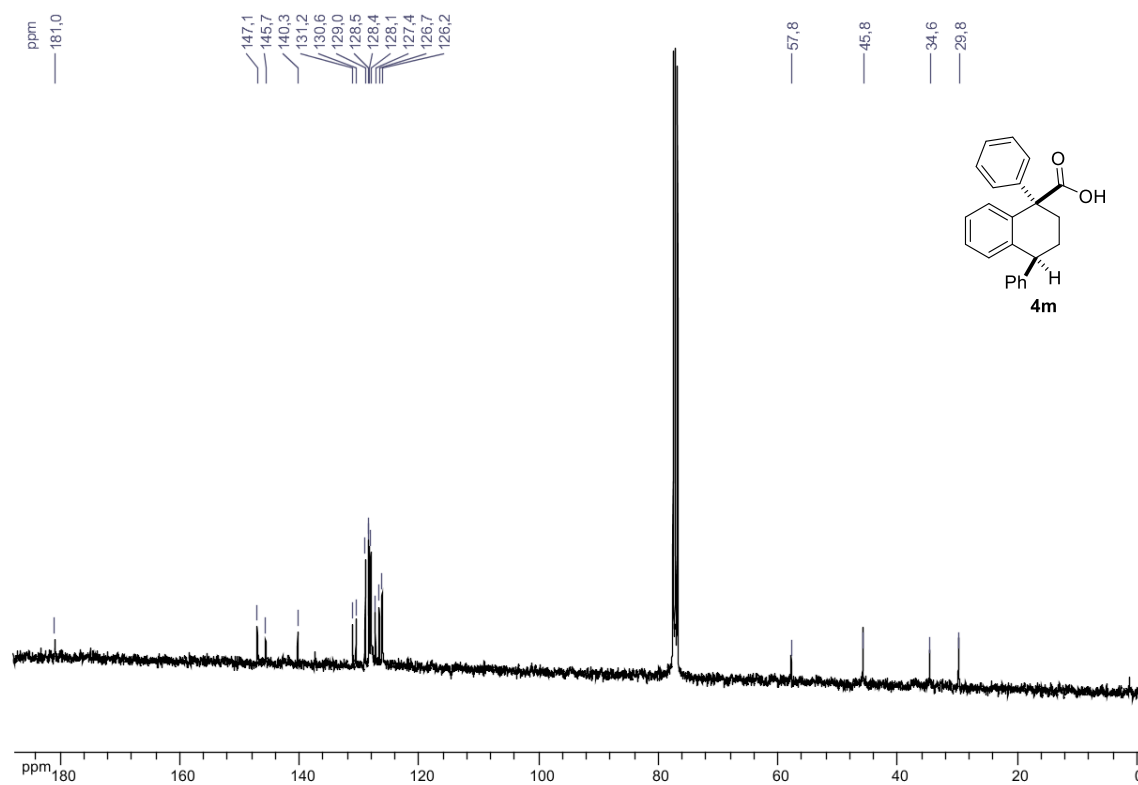



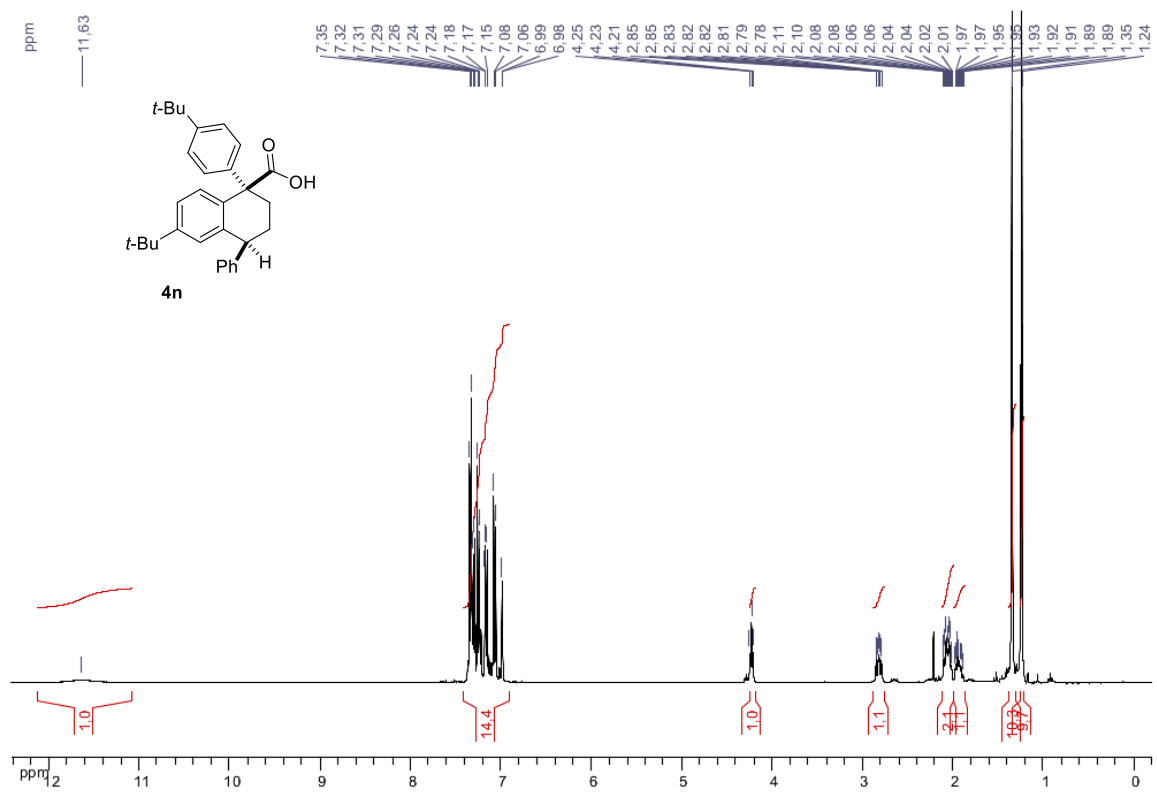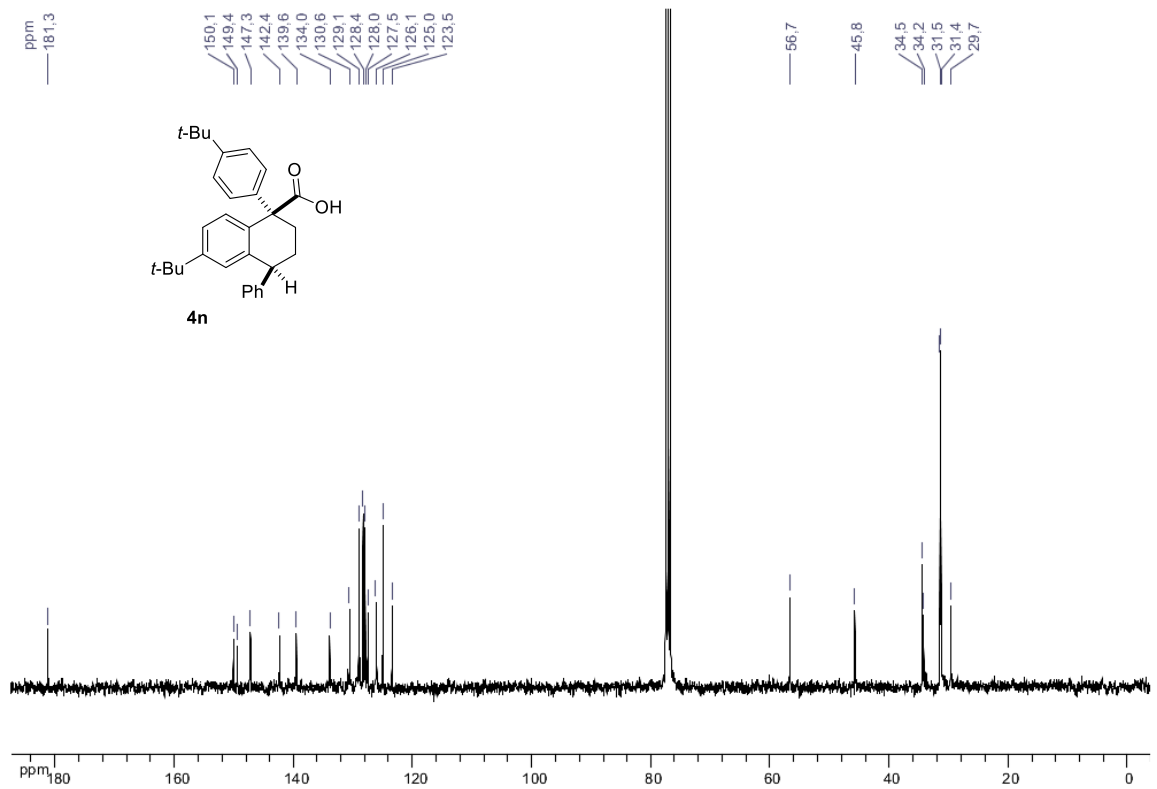

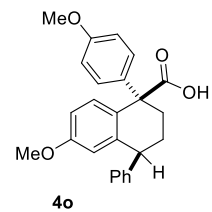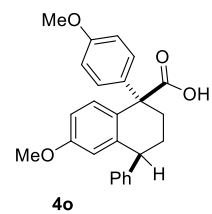

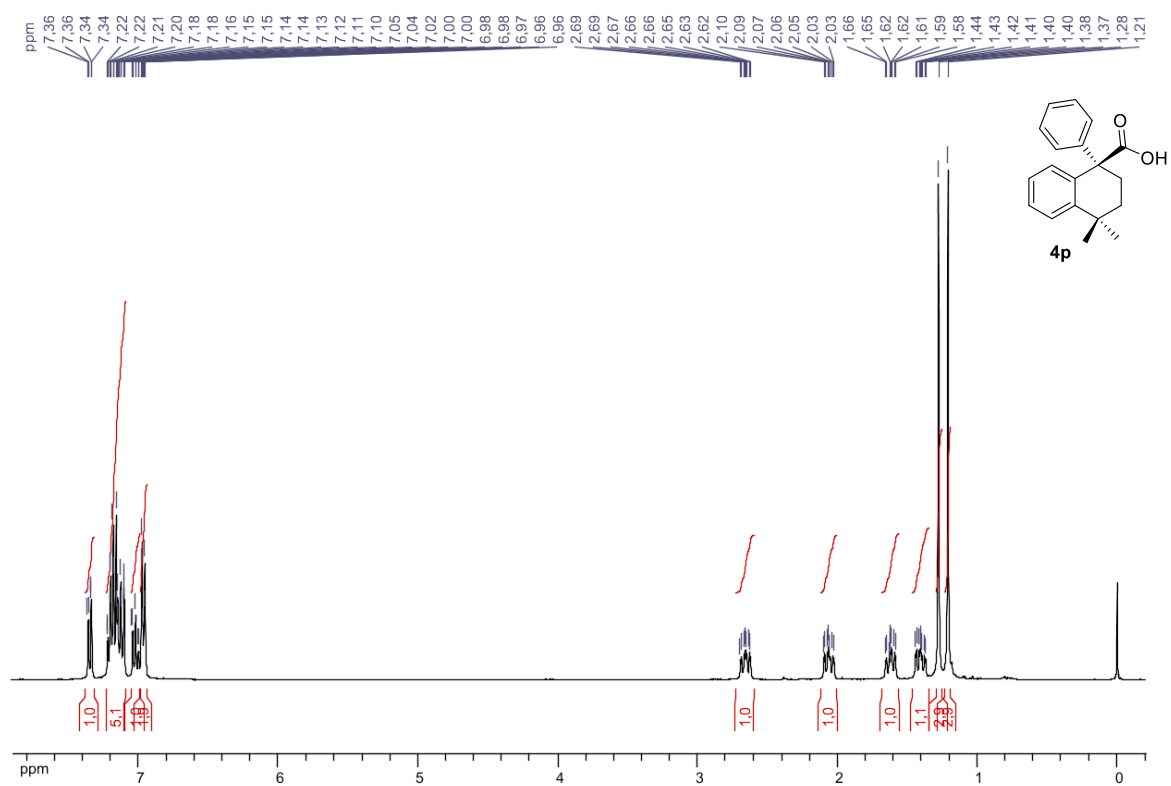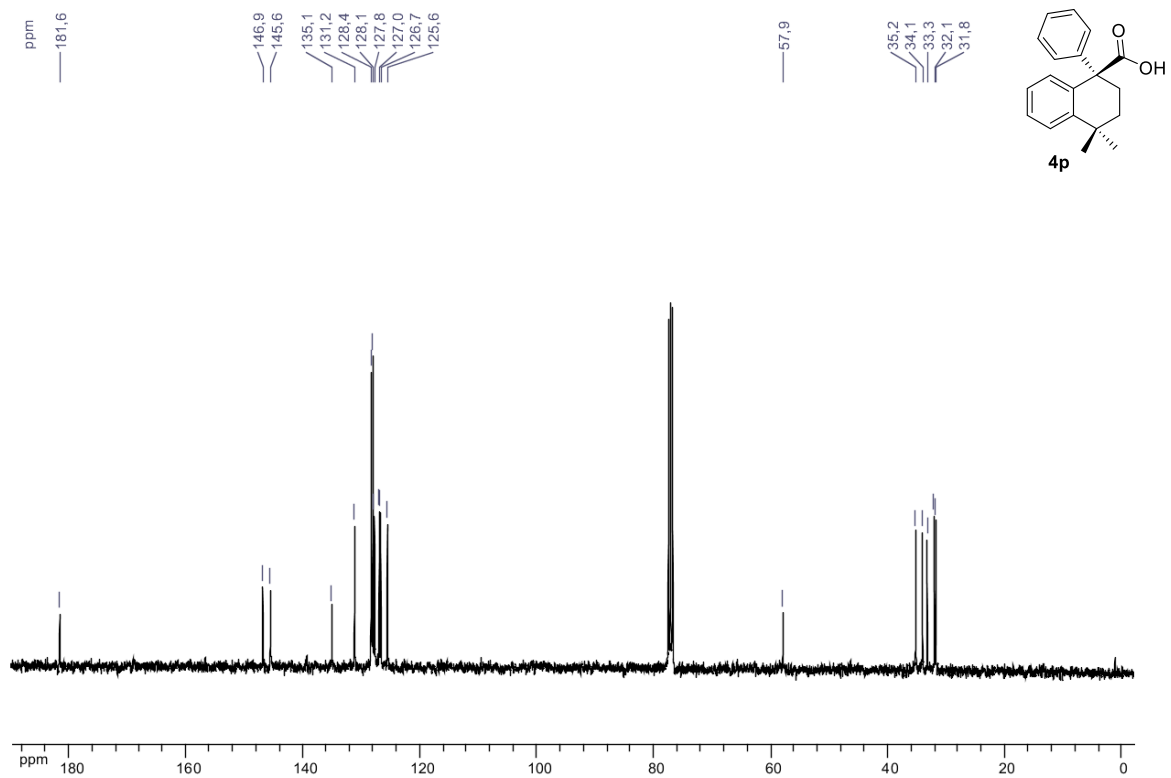

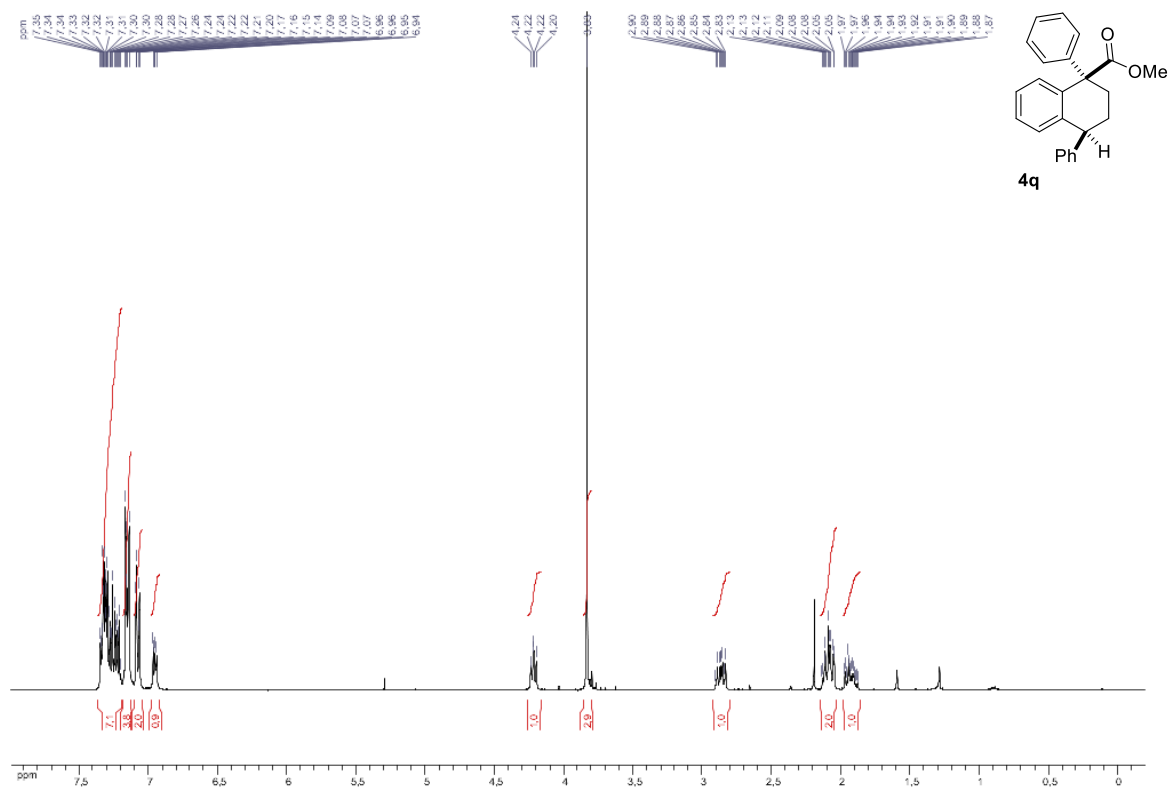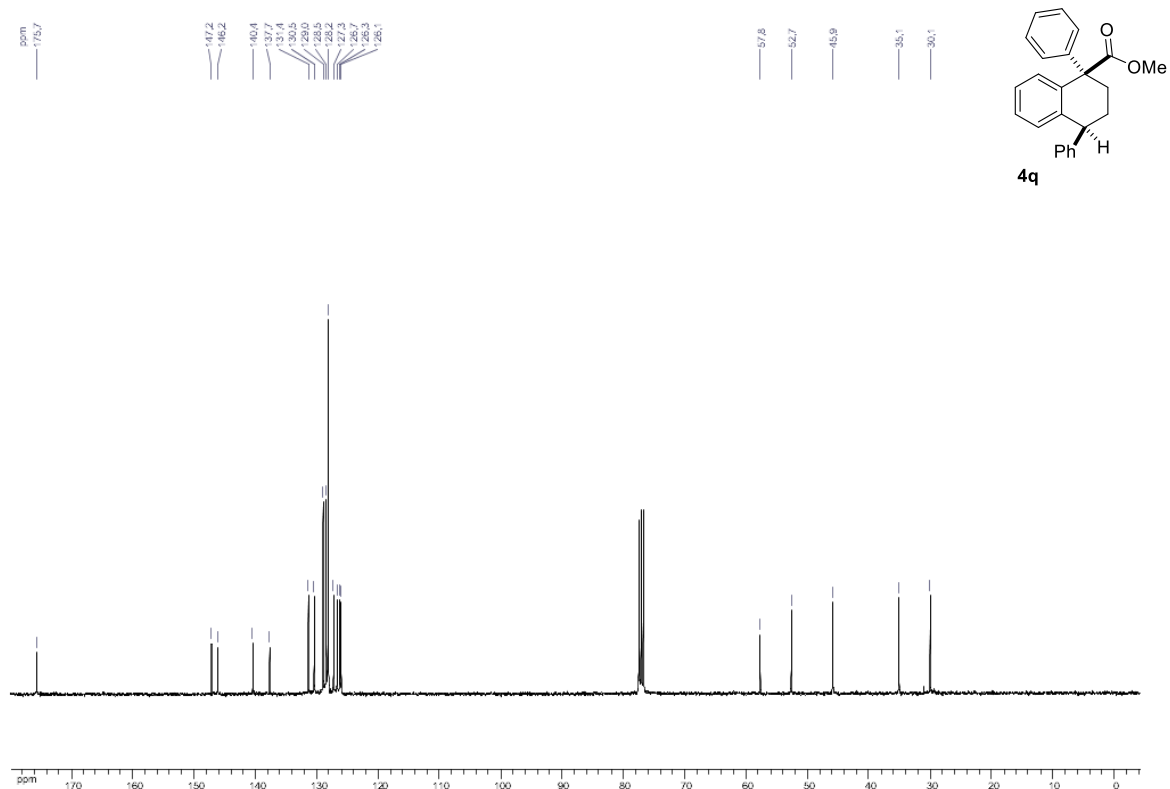

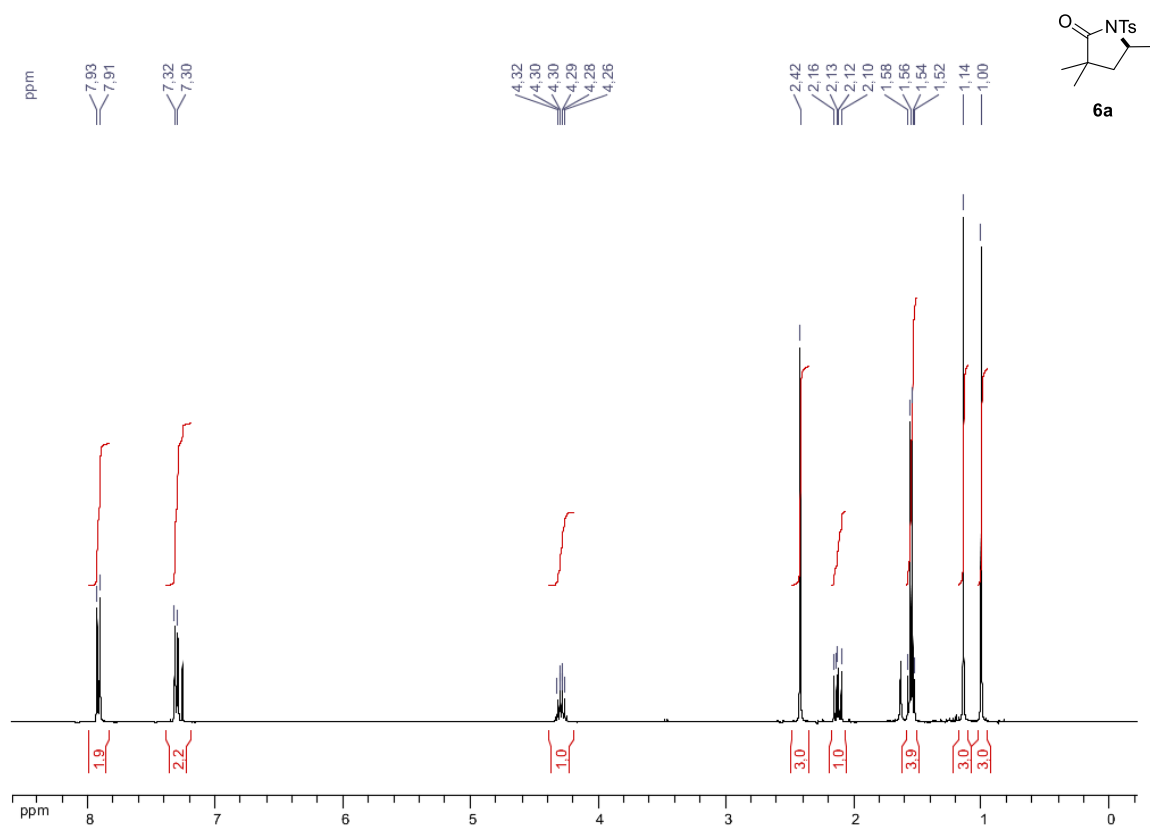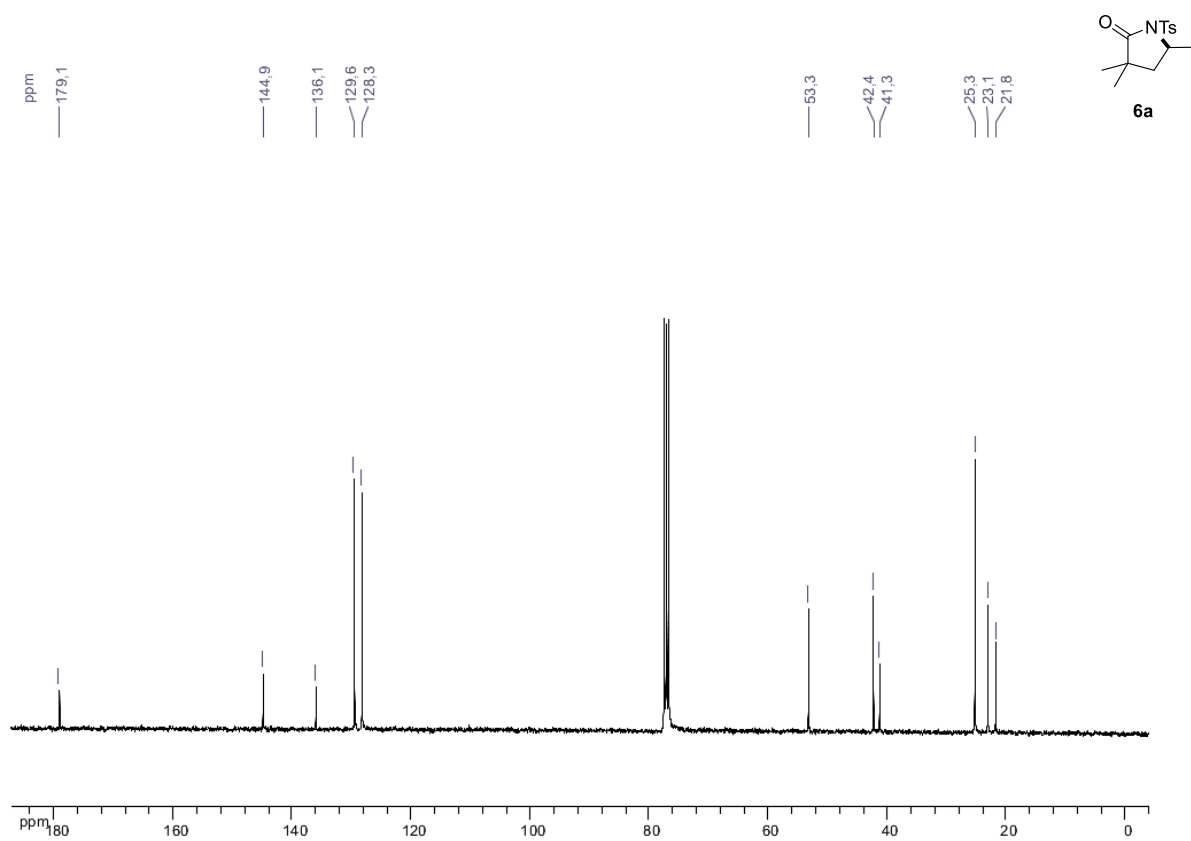

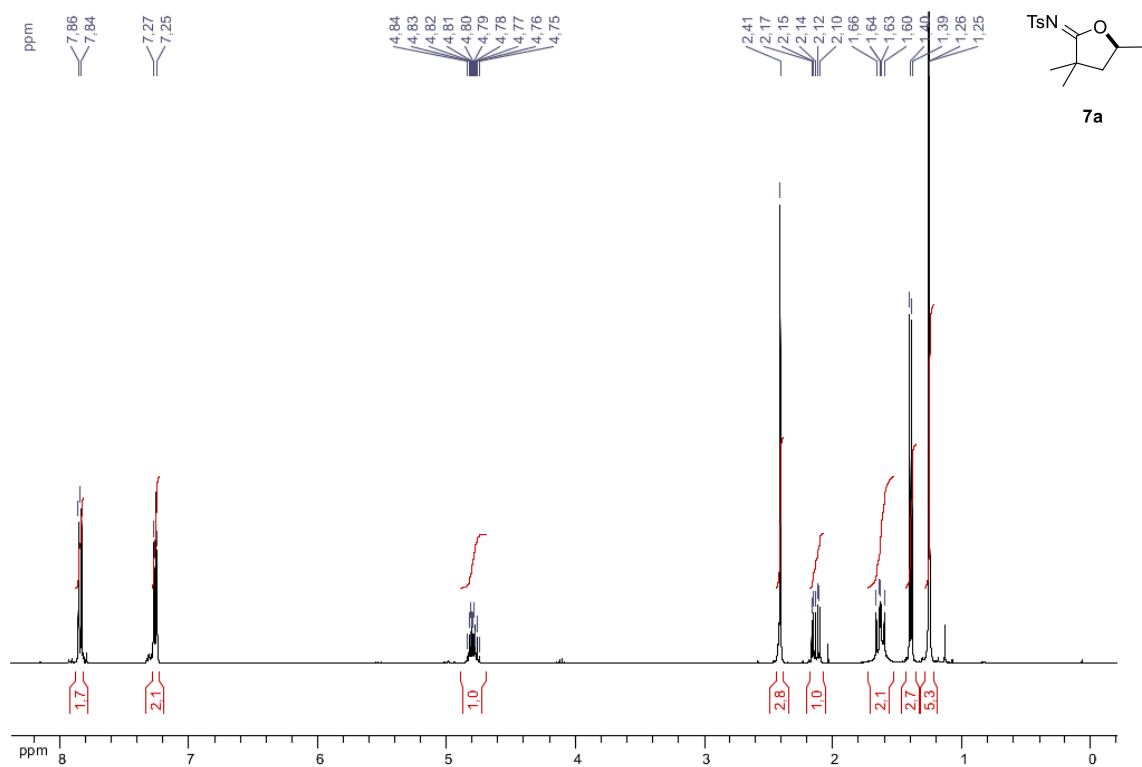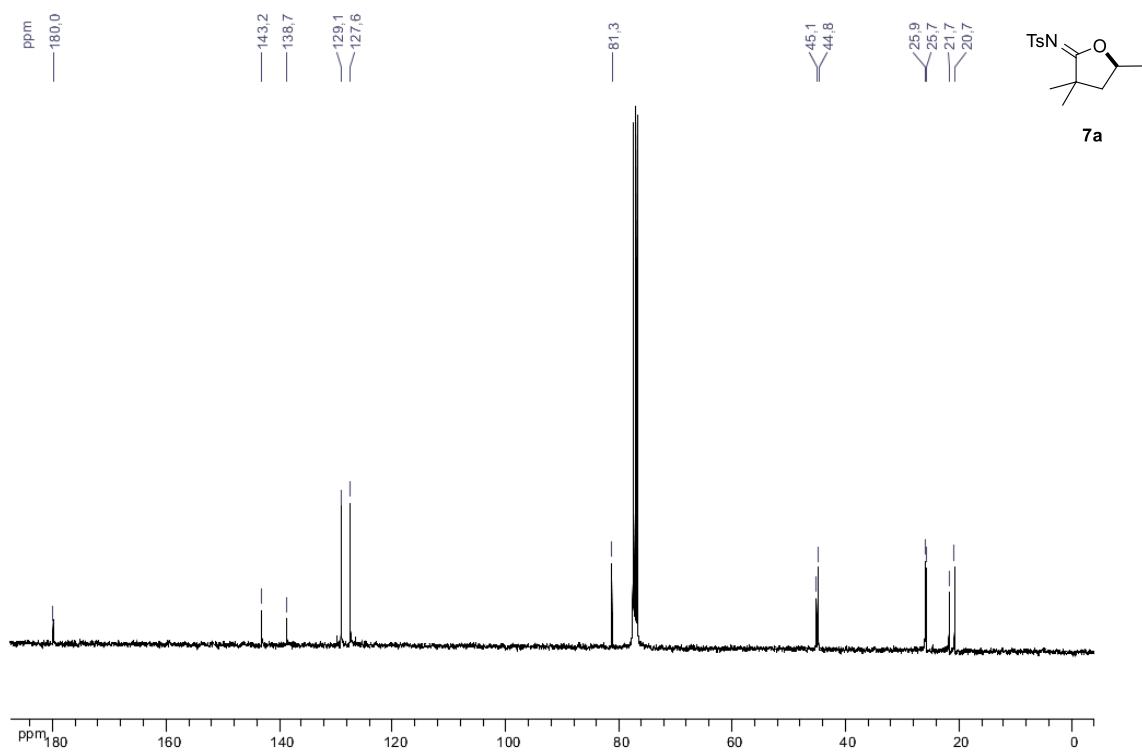

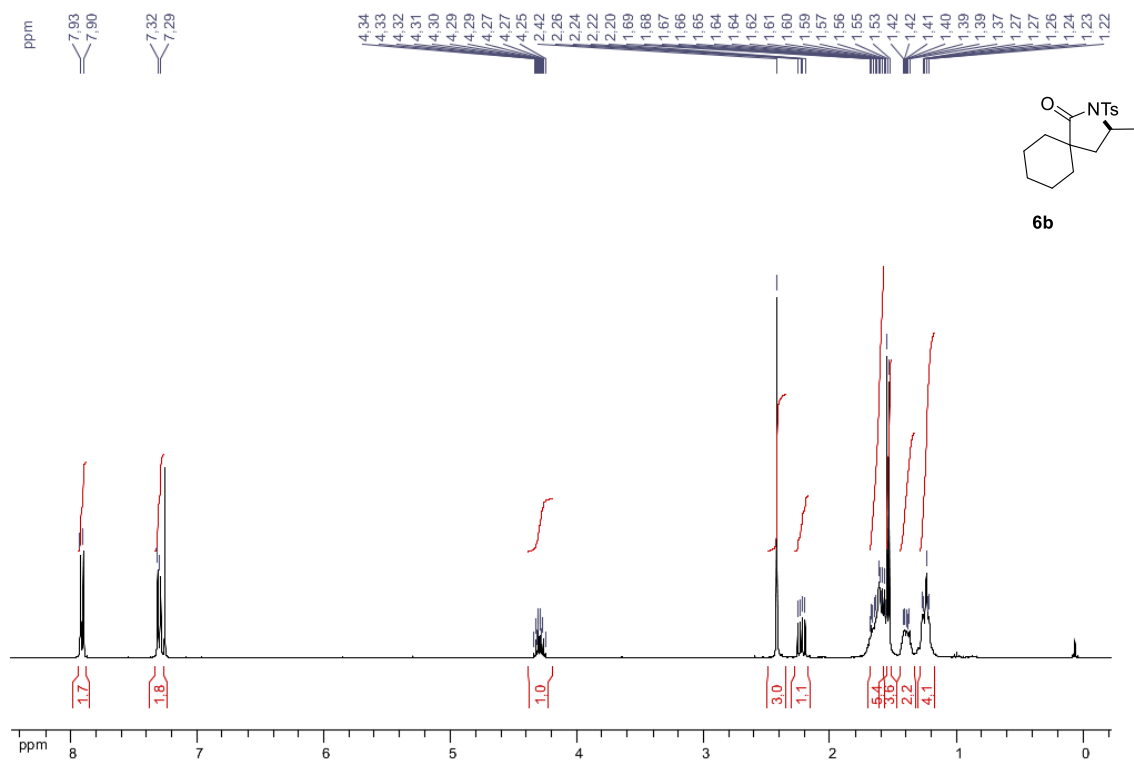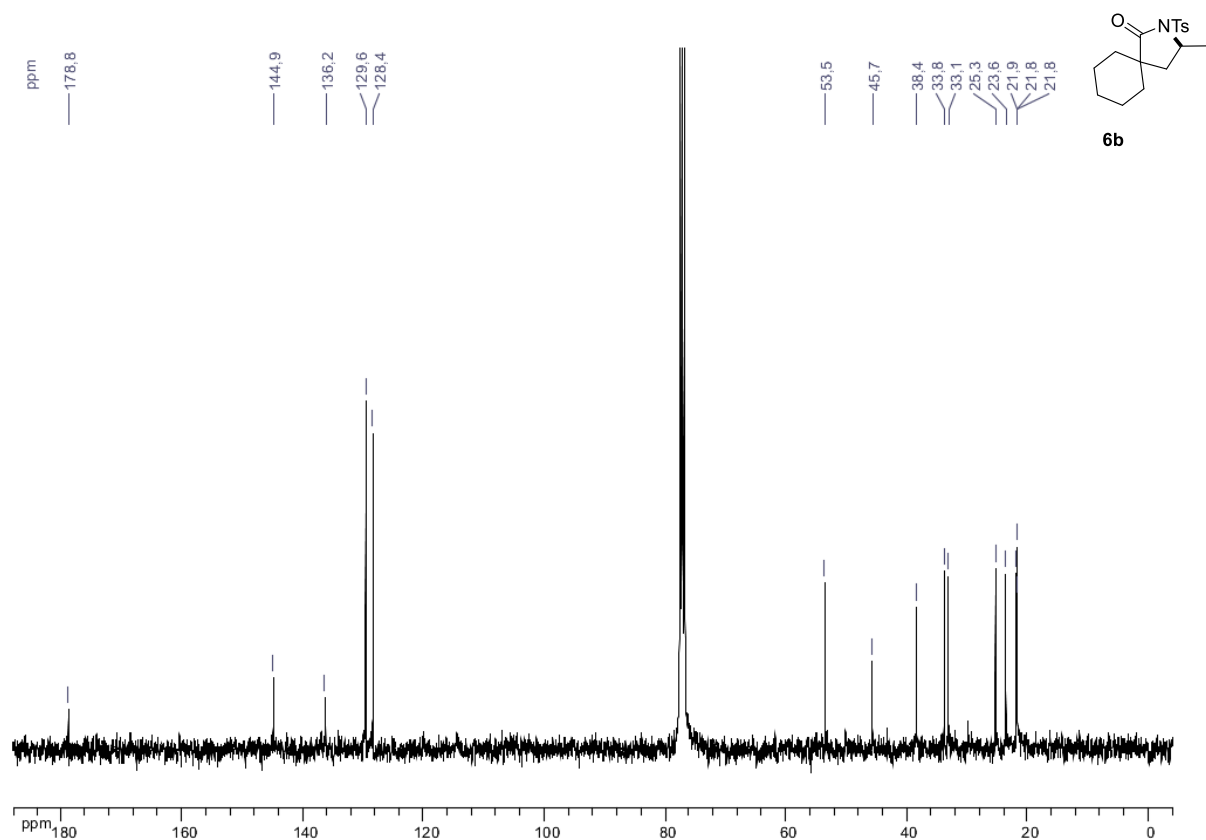

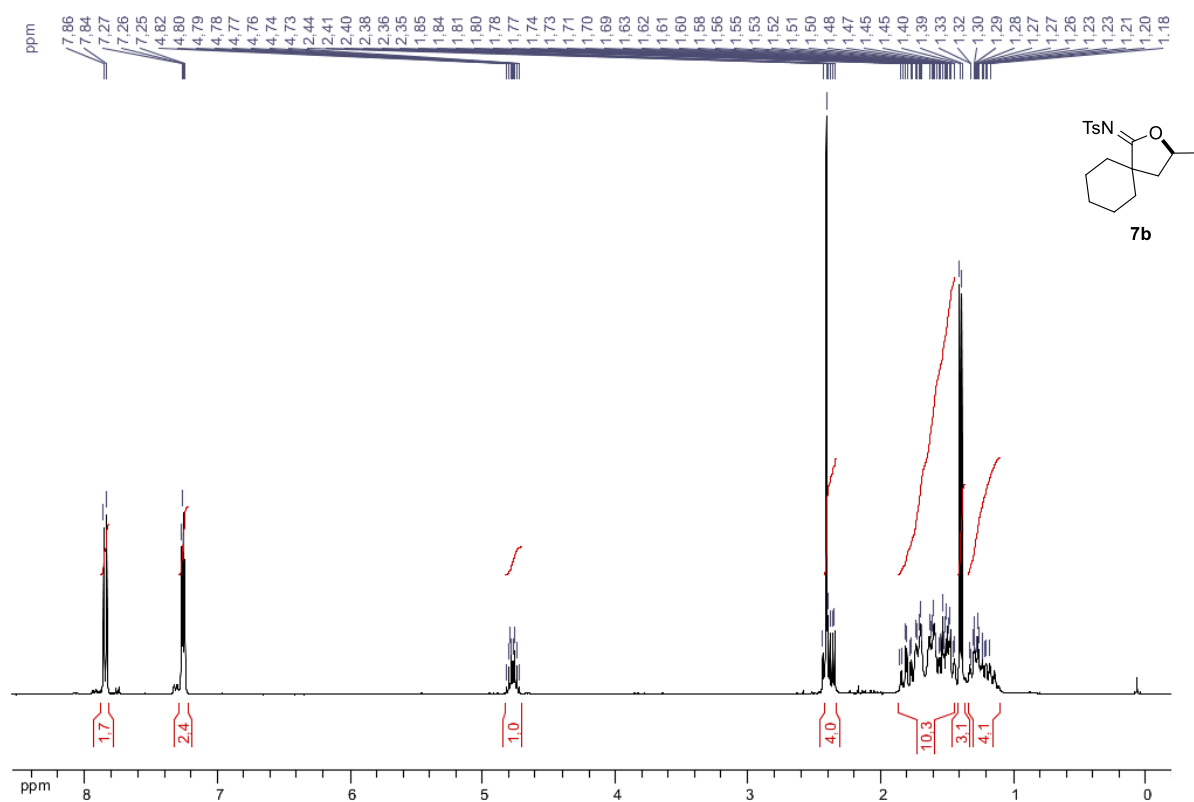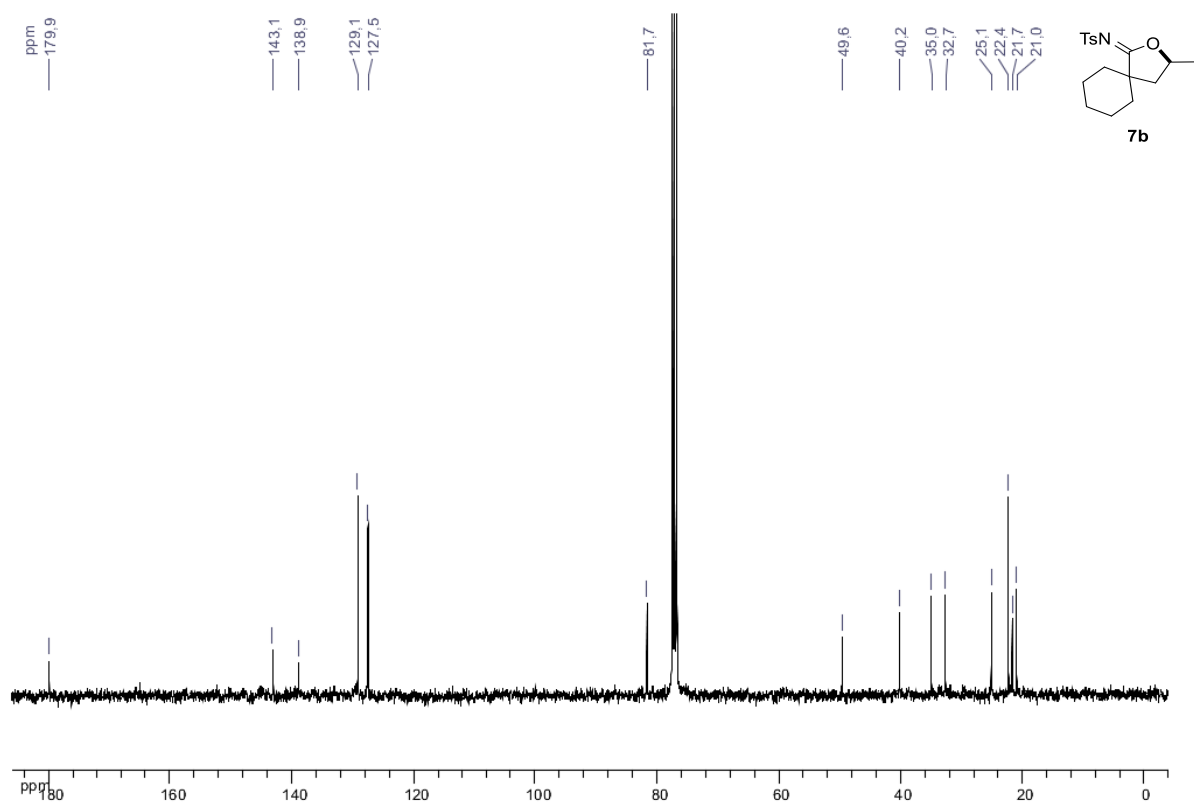



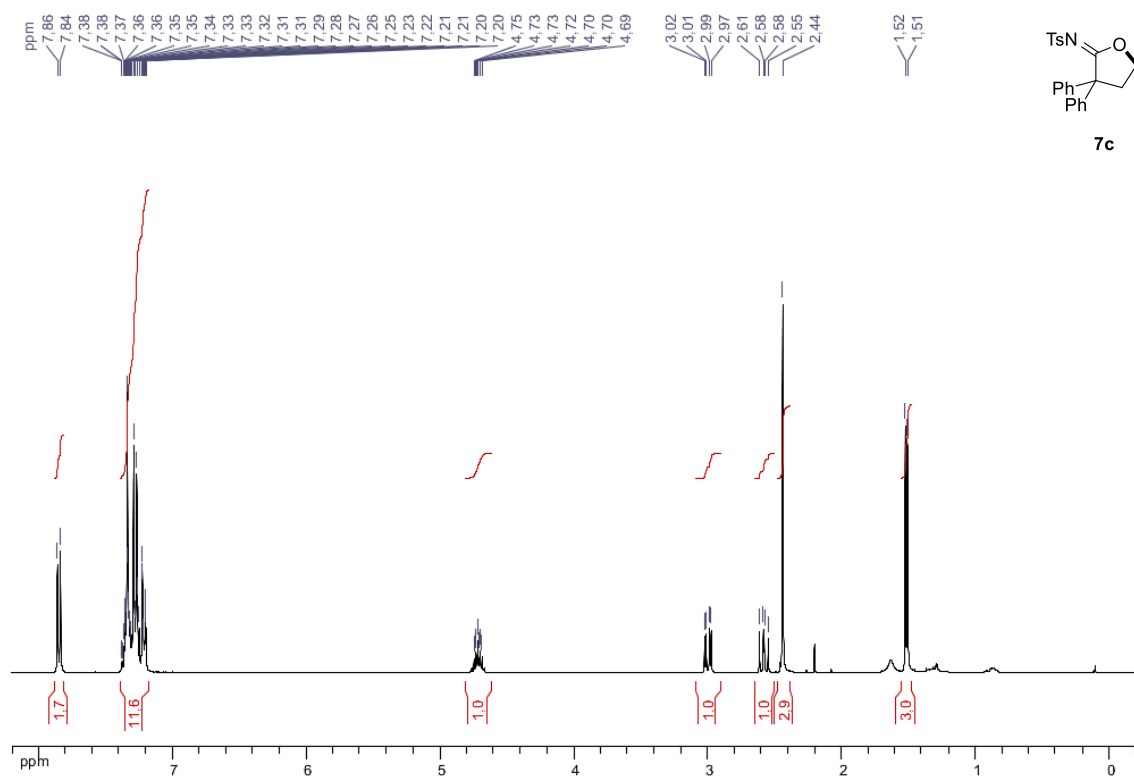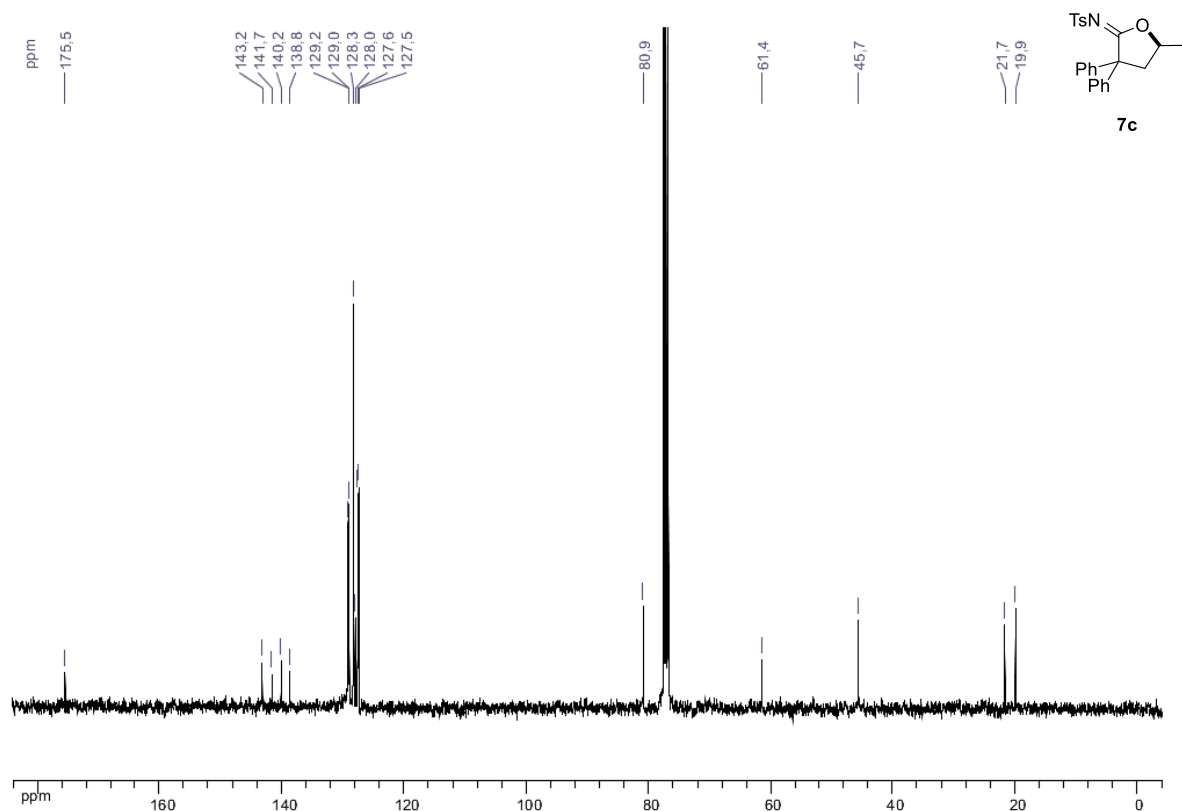

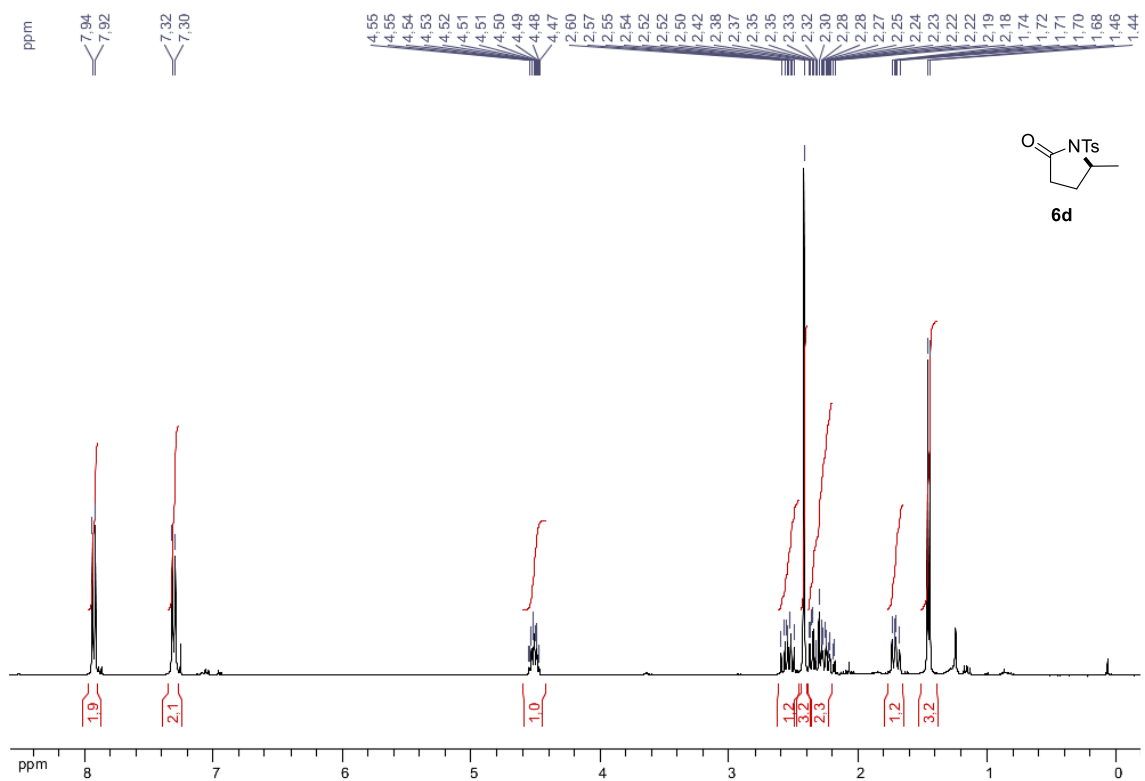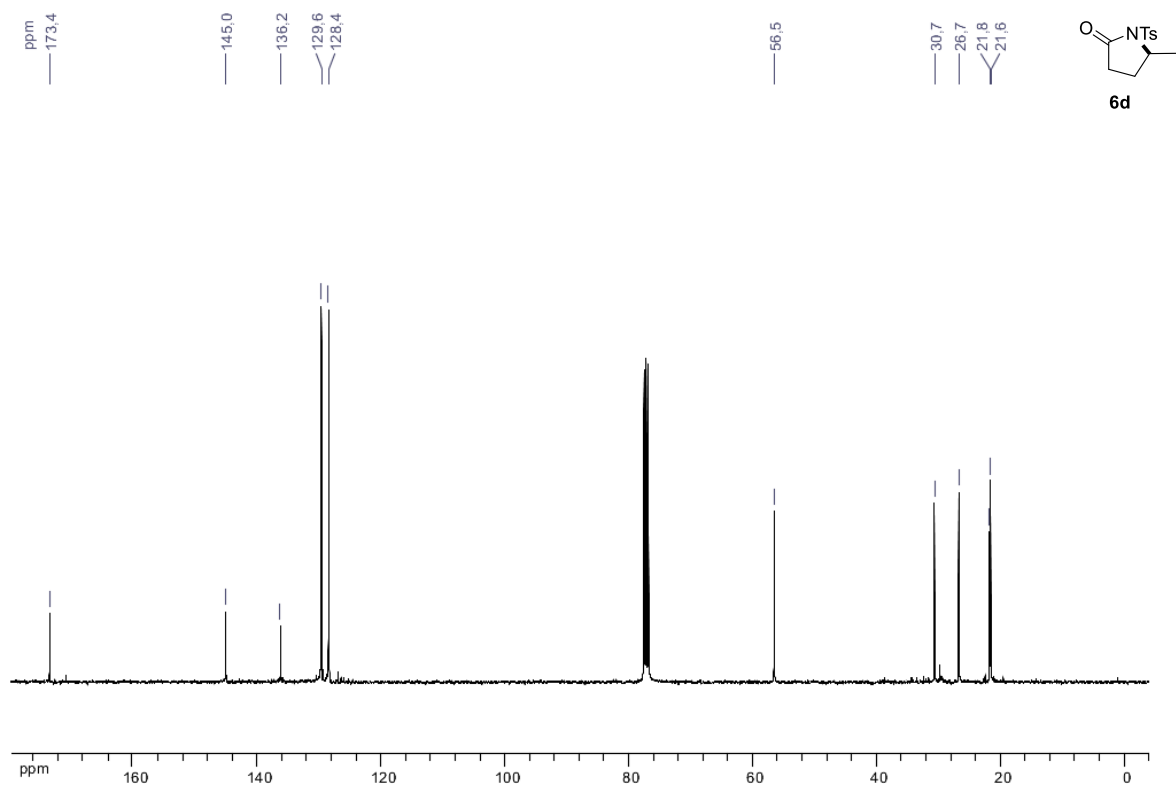

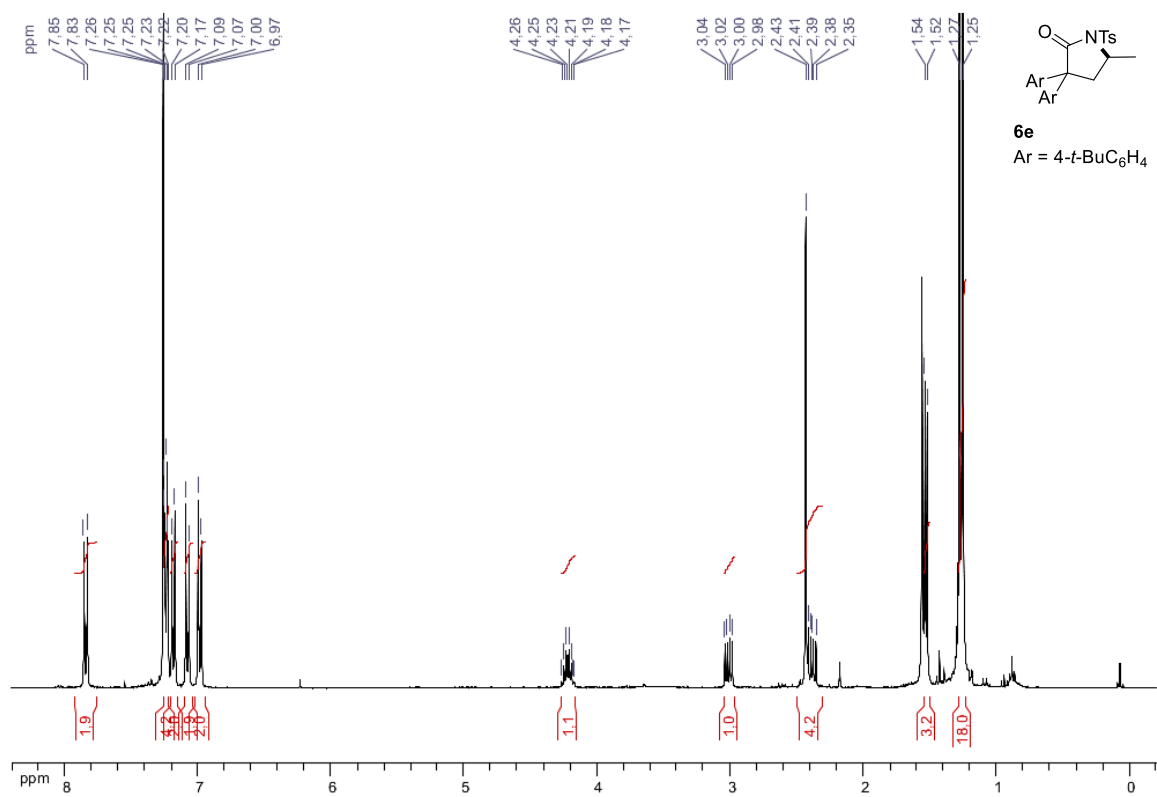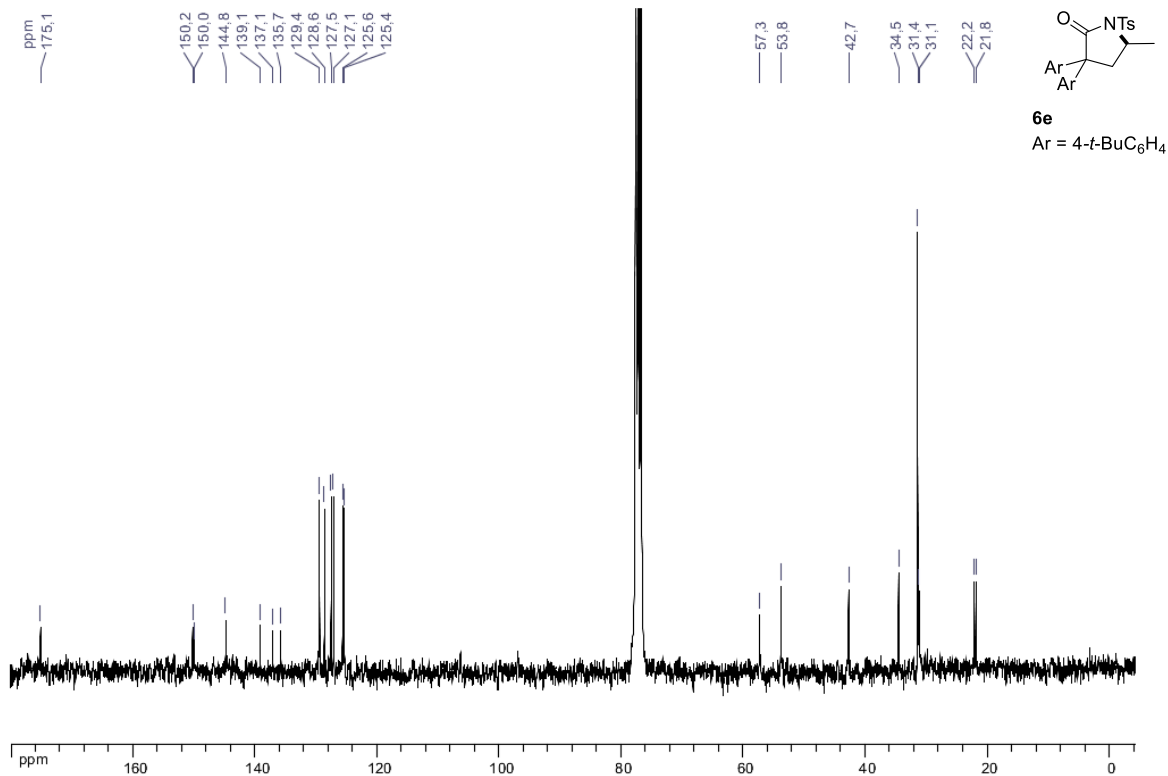

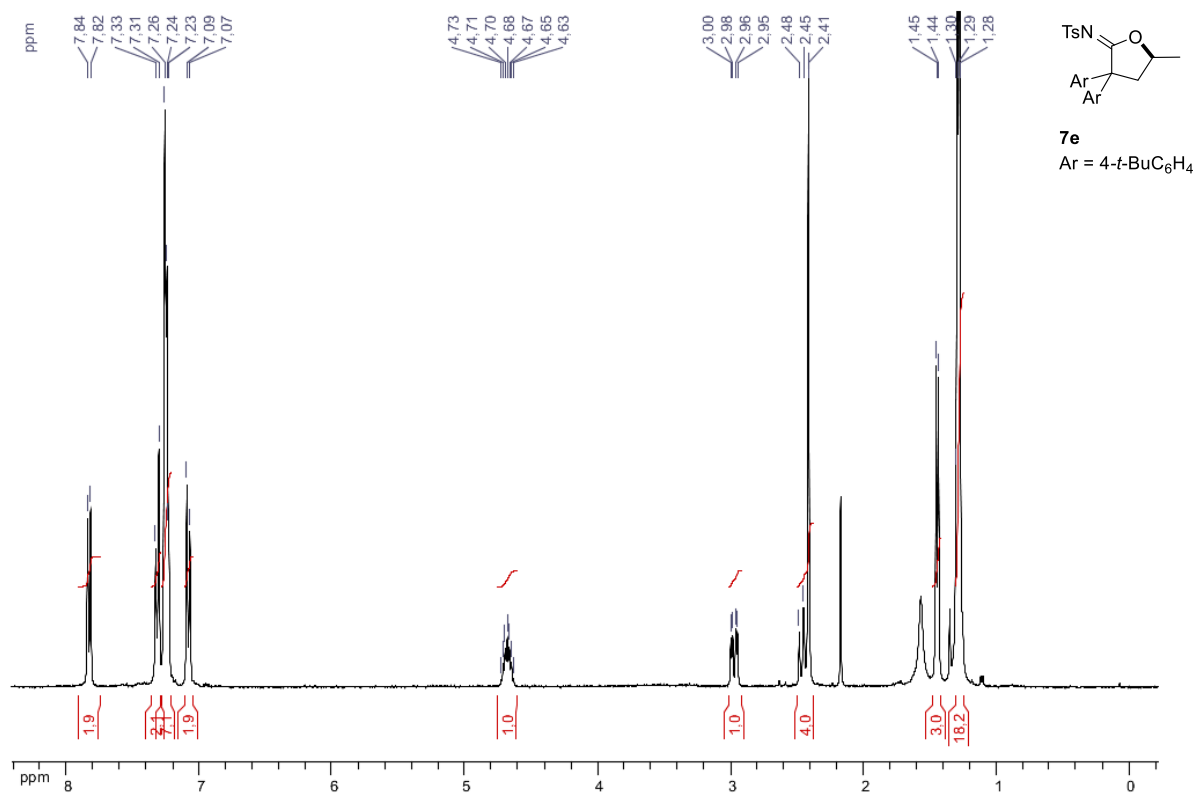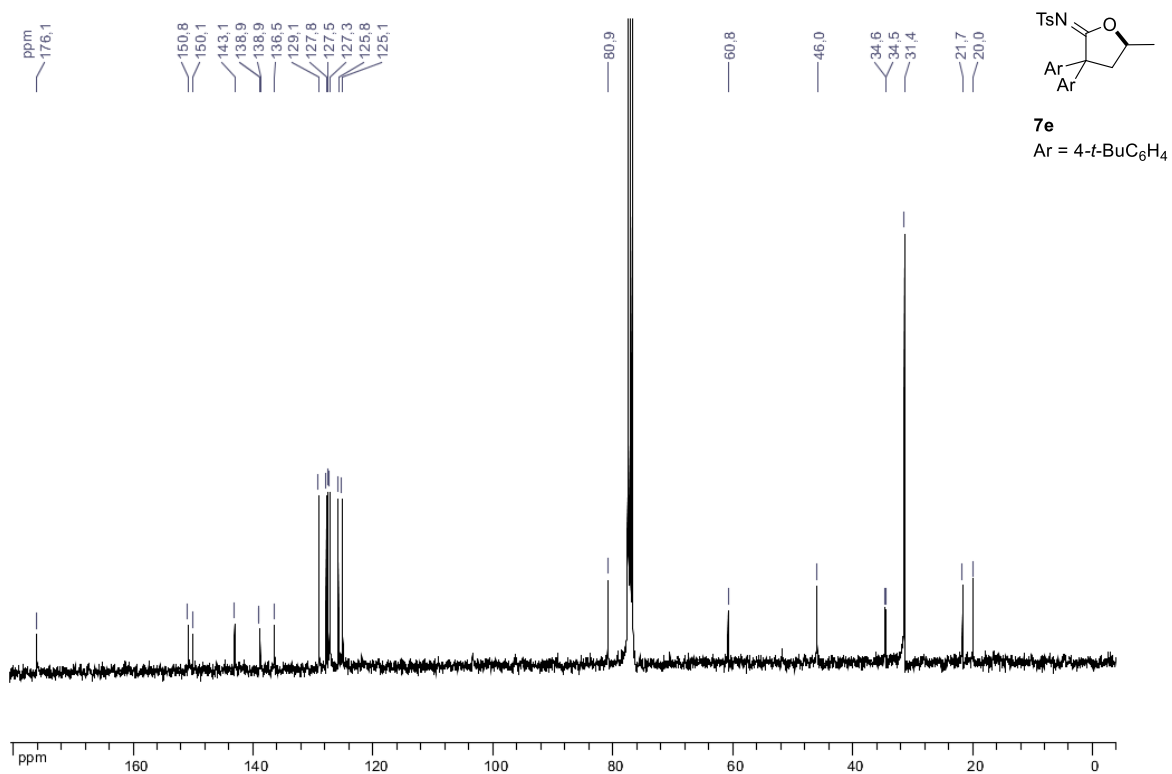

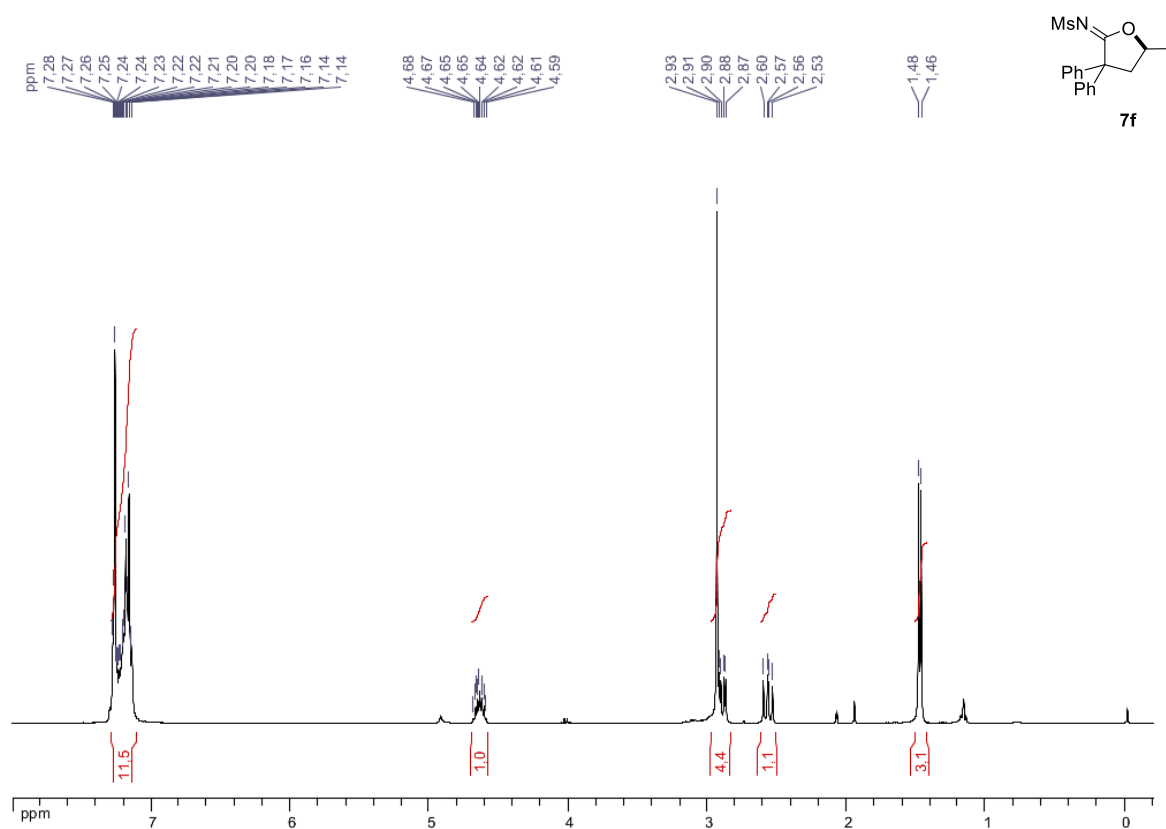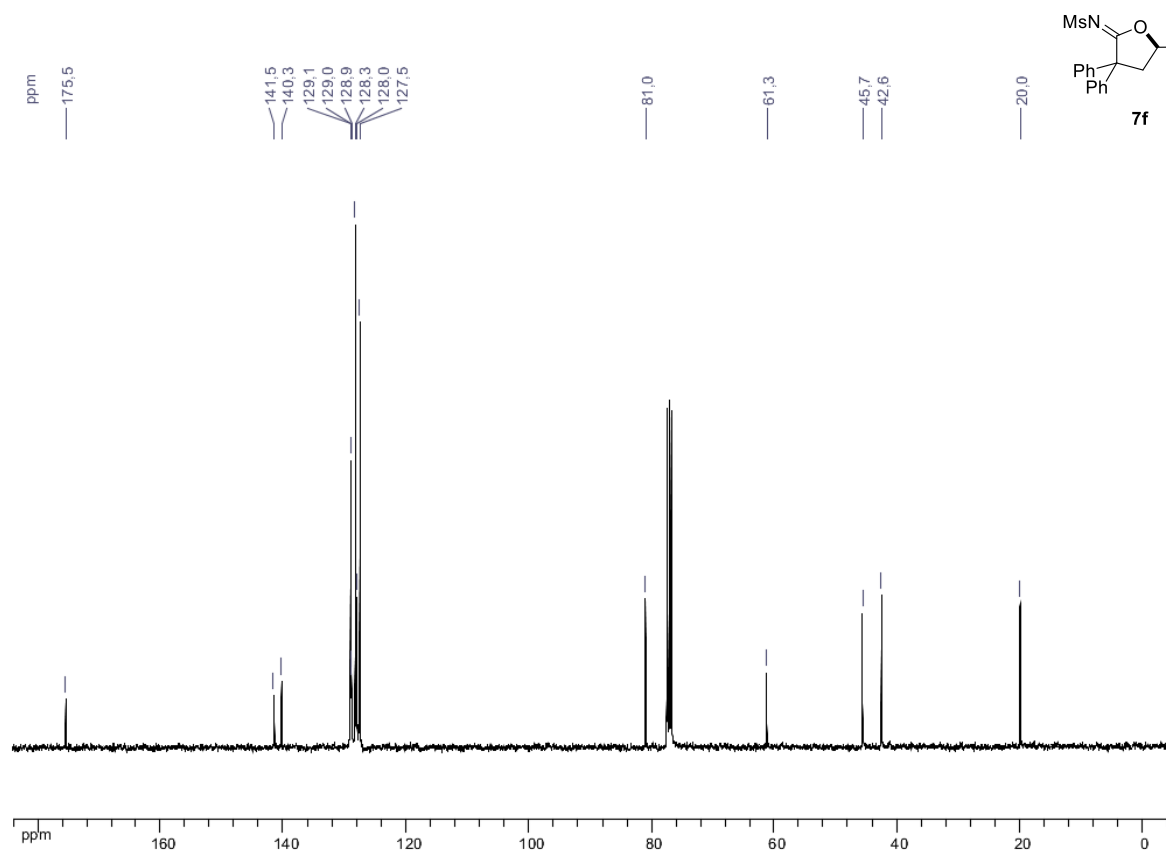

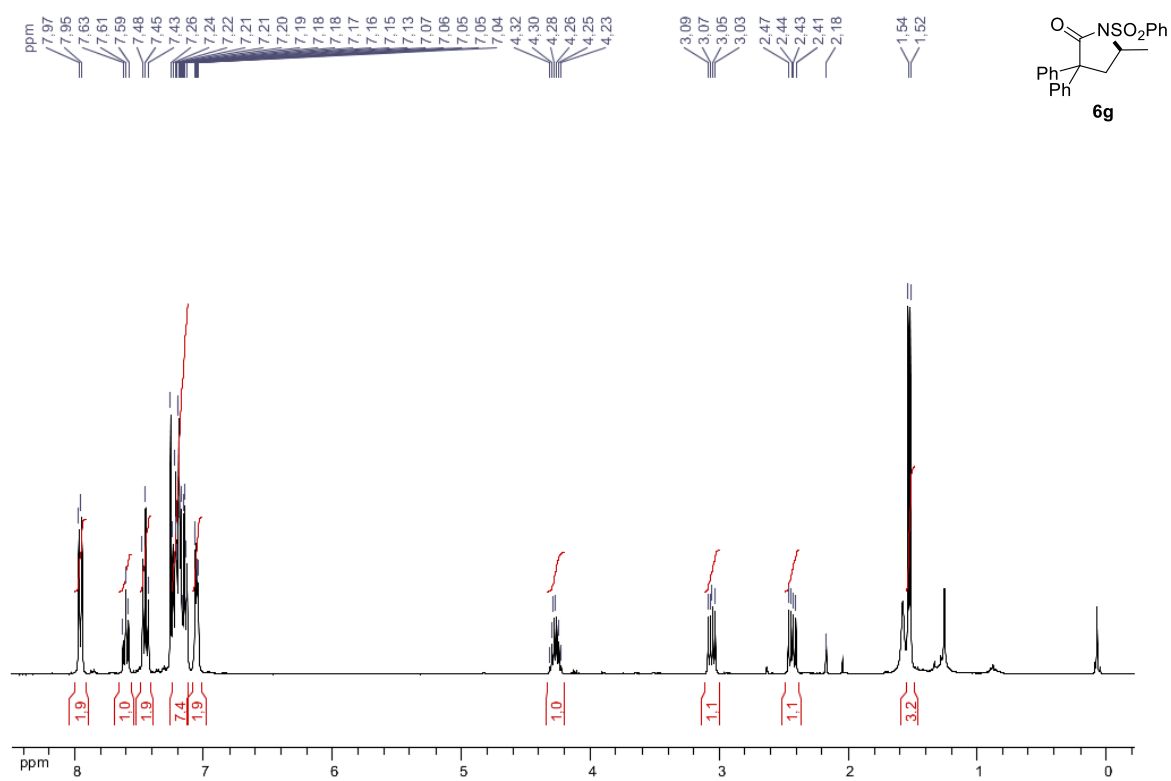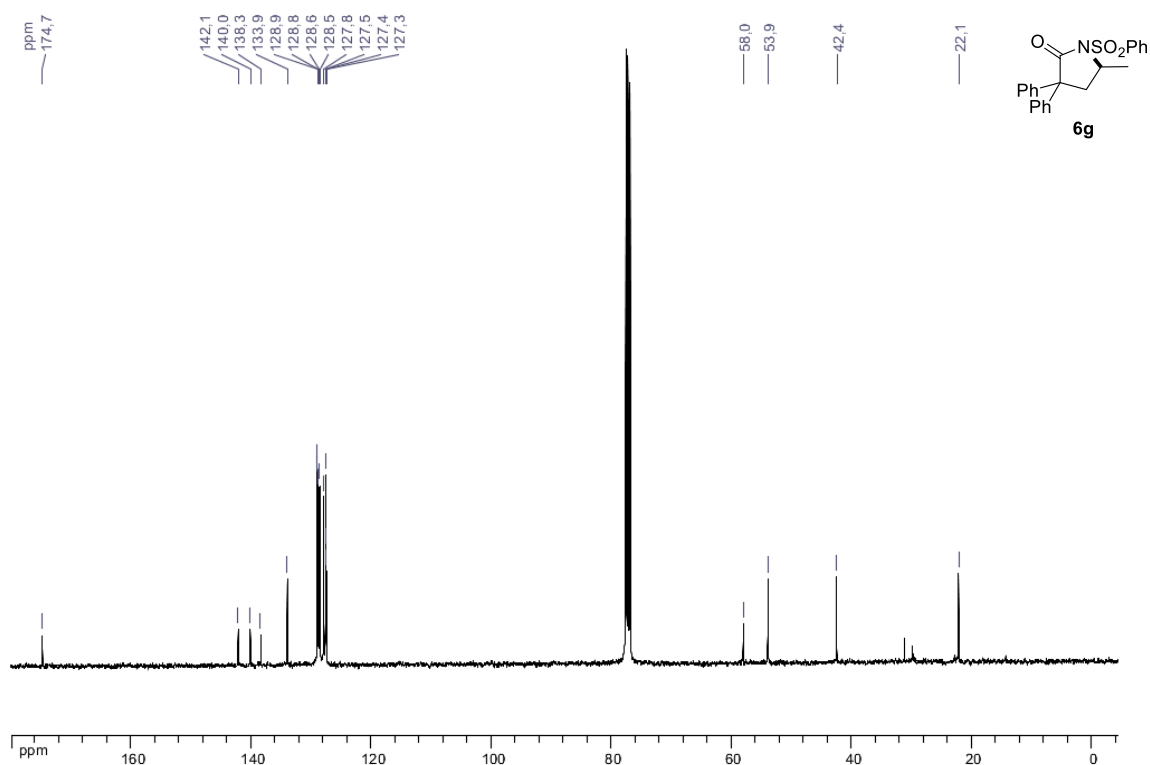

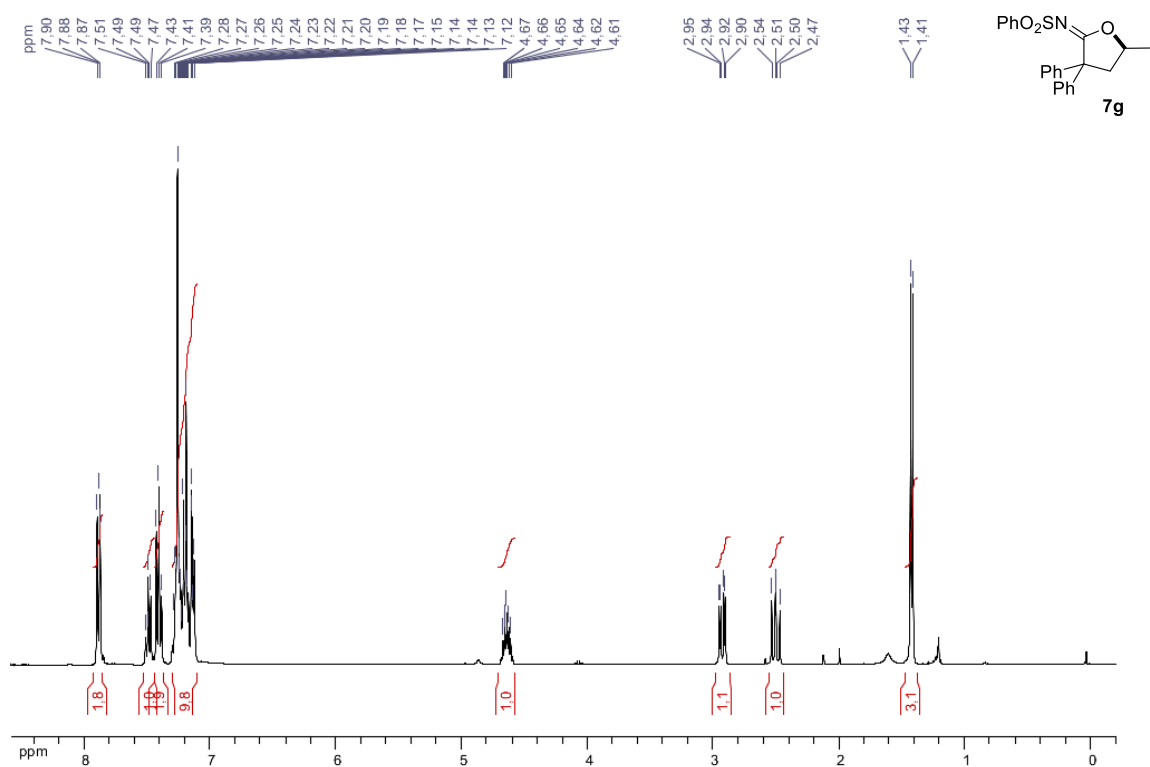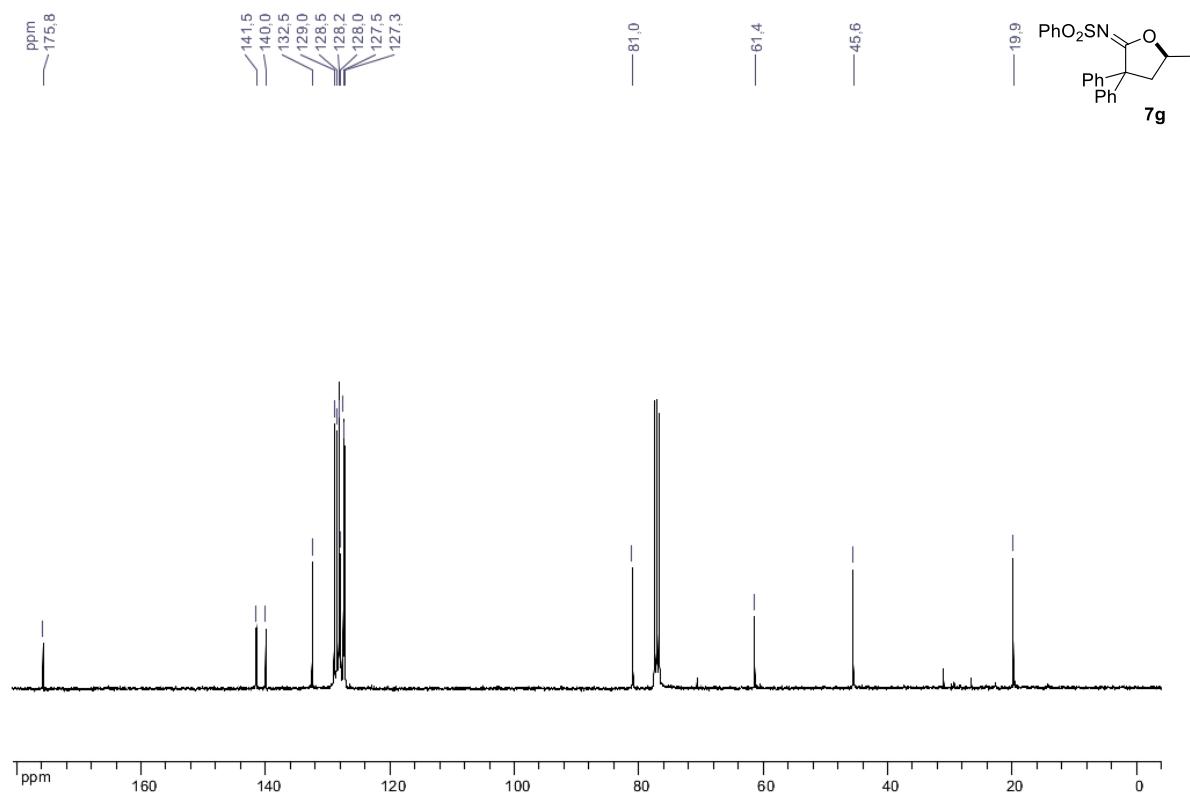

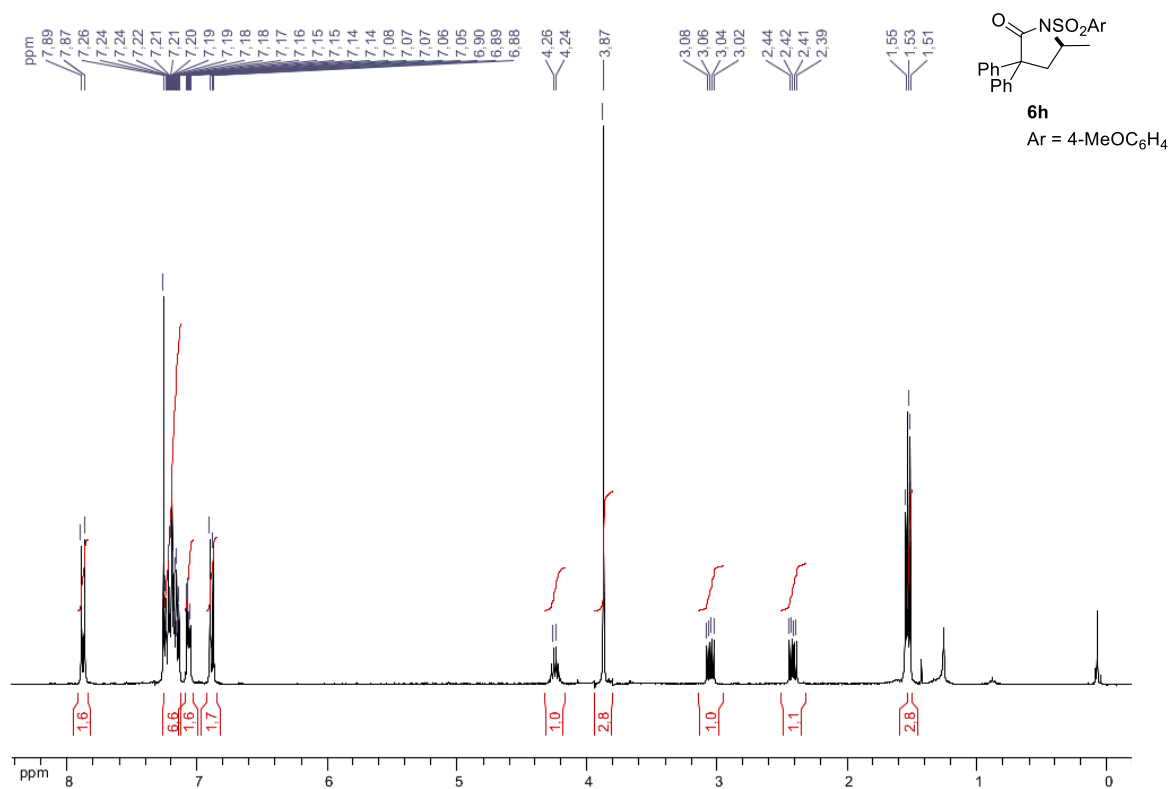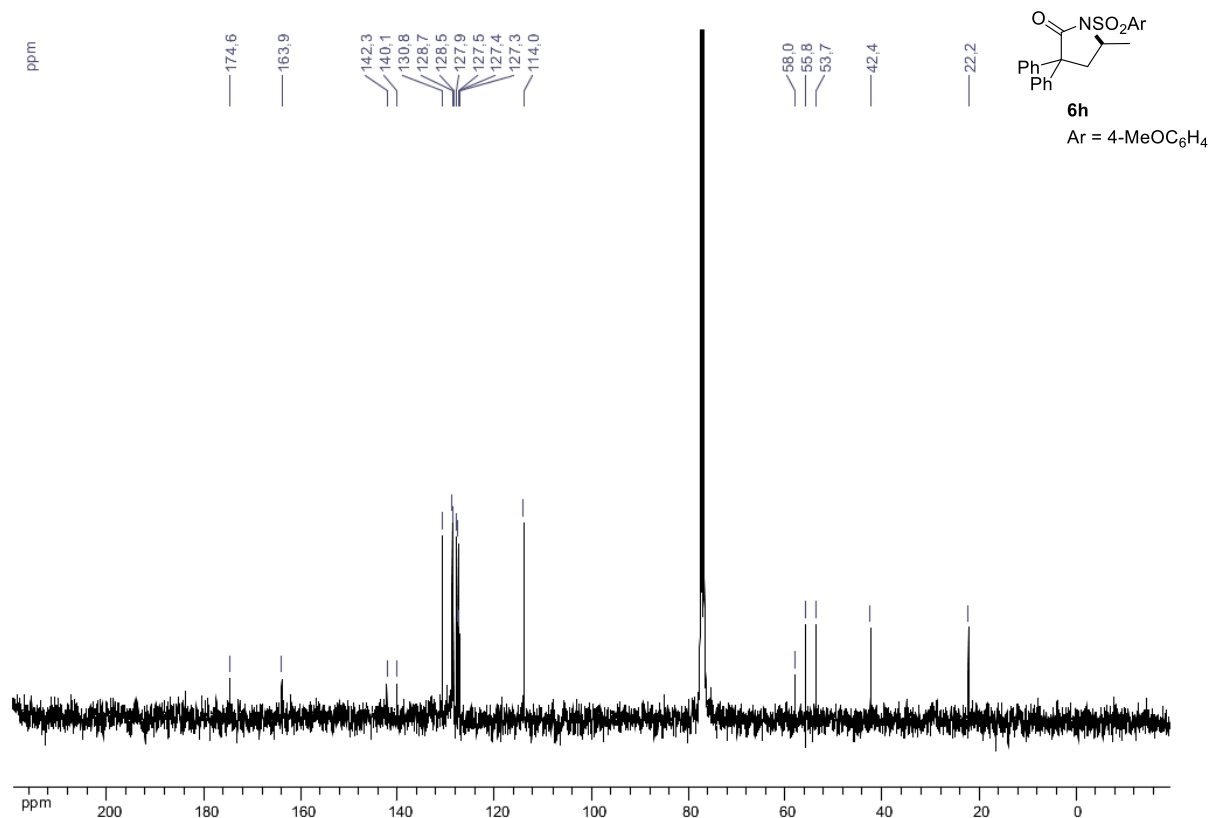



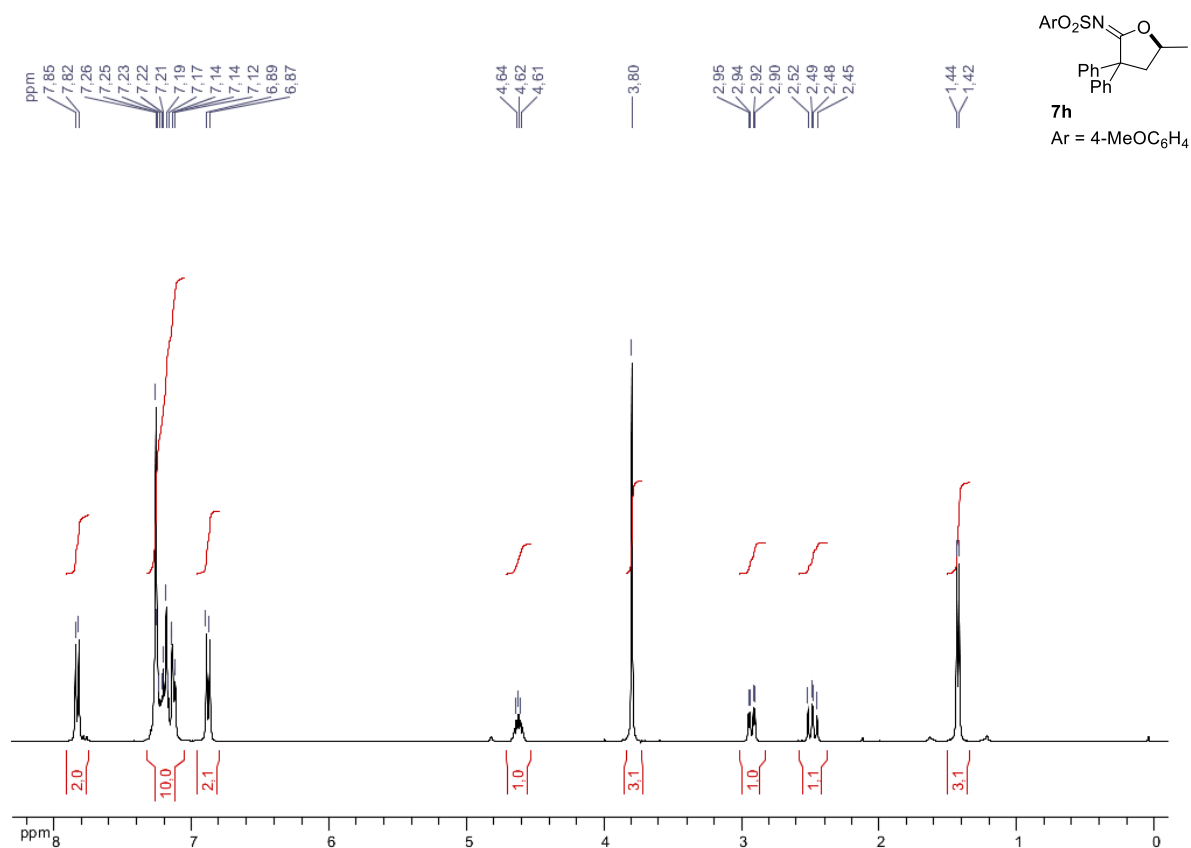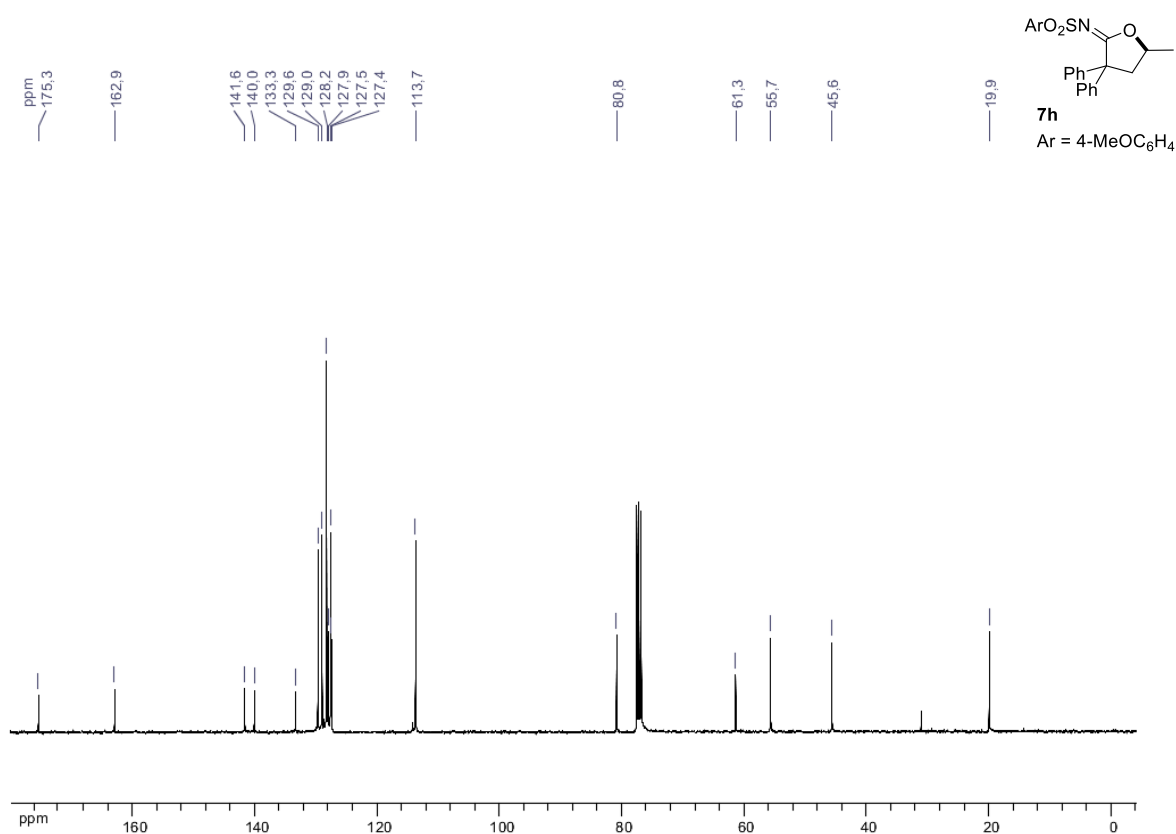

## 6-References

- [1] Nicolai, S.; Piemontesi, C.; Waser, J. A Palladium-Catalyzed Aminoalkynylation Strategy towards Bicyclic Heterocycles: Synthesis of ( $\pm$ )-Trachelanthamidine, *Angew. Chem. Int. Ed.* **2011**, *50*, 4680–4683.
- [2] Nagamoto, M.; Nishimura, T. Iridium-catalyzed asymmetric cyclization of alkenoic acids leading to  $\gamma$ -lactones, *Chem. Commun.* **2015**, *51*, 13466–13469.
- [3] Yu, K.; Lu, P.; Jackson, J. J.; Nguyen, T.-A. D.; Alvarado, J.; Stivala, C. E.; Ma, Y.; Mack, K. A.; Hayton, T. W.; Collum, D. B.; Zakarian, A. Lithium Enolates in the Enantioselective Construction of Tetrasubstituted Carbon Centers with Chiral Lithium Amides as Noncovalent Stereodirecting Auxiliaries. *J. Am. Chem. Soc.* **2017**, *139*, 527–533.
- [4] Takenaka, K.; Akita, M.; Tanigaki, Y.; Takizawa, S.; Sasai, H. Enantioselective Cyclization of 4-Alkenoic Acids via an Oxidative Allylic C-H Esterification *Org Lett.* **2011**, *13*, 3506–3509.
- [5] Ferrand, L.; Tang, Y.; Aubert, C.; Fensterbank, L.; Mouries-Mansuy, V.; Petit, M.; Amatore, M. Niobium-Catalyzed Intramolecular Addition of O-H and N-H Bonds to Alkenes: A Tool for Hydrofunctionalization, *Org Lett.* **2017**, *19*, 2062–2065.
- [6] Rudler, H.; Harris, P.; Parlier, P.; Cantagrel, F.; Denise, B.; Bellassoued, M.; Vaissermann, J. Transition-metal catalyzed synthesis of  $\delta$ -hydroxy- $\gamma$ -lactones from bis(trimethylsilyl) ketene acetals and allylic acetates via  $\gamma$ -unsaturated carboxylic acids. Comments on the formation of  $\alpha$ -cyclopropyl carboxylic acids, *J. Organo. Chem.* **2001**, *624*, 186–202.
- [7] Maust, M. C.; Croft, Z. L.; Sullivan, M. W.; Dove, R. L.; Hardy, E. E.; Brenzovich Jr., W. E. Aromatic substituent effects in palladium-catalyzed intramolecular olefin oxyarylation reactions. *Tetrahedron Lett.* **2020**, *61*, 151674–151678.
- [8] Nagamoto, N.; Yanagi, T.; Nishimura, T.; Yorimitsu, H. Asymmetric Cyclization of N-Sulfonyl Alkenyl Amides Catalyzed by Iridium/Chiral Diene Complexes, *Org. Lett.* **2016**, *18*, 4474–4477.
- [9] Idzik K. R.; Noedler K.; Licha T. Efficient Synthesis of Readily Water-Soluble Amides Containing Sulfonic Groups, *Synth. Commun.* **2014**, *44*, 133–140.
- [10] Li, J.; Wei, J.; Zhu, B.; Wang, T.; Jiao, N. Cu-catalyzed oxygenation of alkene-tethered amides with O<sub>2</sub> via unactivated C=C bond cleavage: a direct approach to cyclic imides *Chem. Sci.* **2019**, *10*, 9099–9103.
- [11] Gonzalez-de-Castro, A.; Robertson, M. C.; Xiao J. L. Dehydrogenative  $\alpha$ -Oxygenation of Ethers with an Iron Catalyst, *J. Am. Chem. Soc.* **2014**, *136*, 23, 8350–8360.
- [12] Yang, C. H.; Fan, W. W.; Liu, G. Q.; Duan, L. L.; Lia, L.; Li, Y. M. On the understanding of BF<sub>3</sub>·Et<sub>2</sub>O-promoted intra and intermolecular amination and oxygenation of unfunctionalized olefins, *RSC Adv* **2015**, *5*, 61081–61093.
- [13] Peña-López, M.; Neumann, H.; Beller, M. Iron(II) Pincer-Catalyzed Synthesis of Lactones and Lactams through a Versatile Dehydrogenative Domino Sequence. *ChemCatChem* **2015**, *7*, 865–871.
- [14] Adrio, L. A.; Quek, L. S.; Taylor, J. G.; Hii, K. K. (Mimi) Copper-catalysed intramolecular O–H addition to unactivated alkenes *Tetrahedron* **2009**, *65*, 10334–10338.
- [15] Nagamoto, M.; Nishimura, T.; Yorimitsu, H. Iridium-Catalyzed Intramolecular Oxidative Cyclization of Alkenyl Amides and Alkenoic Acids, *Synthesis* **2017**, *49*, 4272–4282.
- [16] Fischer, D. M.; Balkenhohl, M.; Carreira, E. M. Cobalt-Catalyzed Cyclization of Unsaturated N -Acyl Sulfonamides: A Diverted Mukaiyama Hydration Reaction. *JACS Au* **2022**, *2*, 1071–1077.
- [17] Sheldrick, G. M. SHELXS-97, Program for Crystal Structure Solution, University of Göttingen, Göttingen, Germany, **1997**.
- [18] Sheldrick, G. M. *Acta Crystallogr., Sect. A: Found. Crystallogr.* **2008**, *64*, 112–122.
- [19] Farrugia, L. J. *J. Appl. Cryst.* **1999**, *32*, 837.
